# Supplementary material
Source: PubMed Central journal article supplement (PMC5357143)
Supplement: NIHMS849704-supplement-Supporting_Information.pdf [file NIHMS849704-supplement-Supporting_Information.pdf]

## 11-Step Enantioselective Synthesis of (-)-Lomaiviticin Aglycon

Seth B. Herzon\*, Liang Lu,<sup>†</sup> Christina M. Woo,<sup>†</sup> and Shivajirao L. Gholap

Department of Chemistry, Yale University, 225 Prospect Street, New Haven, CT 06520-8107

*Journal of the American Chemical Society*

### Supporting Information

#### Index

|                                                                         |            |
|-------------------------------------------------------------------------|------------|
| <b>General Experimental Procedures</b> .....                            | <b>S2</b>  |
| <b>Materials</b> .....                                                  | <b>S2</b>  |
| <b>Instrumentation</b> .....                                            | <b>S2</b>  |
| <b>Synthetic Procedures</b> .....                                       | <b>S4</b>  |
| <b>Catalog of Nuclear Magnetic Resonance and Infrared Spectra</b> ..... | <b>S39</b> |
| <b>Bibliography</b> .....                                               | <b>S81</b> |

---

<sup>†</sup> These authors contributed equally to this work.

**General Experimental Procedures.** All reactions were performed in single-neck, flame-dried, round-bottomed flasks fitted with rubber septa under a positive pressure of argon, unless otherwise noted. Air- and moisture-sensitive liquids were transferred via syringe or stainless steel cannula, or were handled in a nitrogen-filled drybox (working oxygen level <1 ppm). Organic solutions were concentrated by rotary evaporation at 30–33 °C. Normal and reverse phase flash-column chromatography was performed as described by Still et al.<sup>1</sup> Normal phase purifications employ silica gel (60 Å, 40–63 µm particle size) purchased from Sorbent Technologies (Atlanta, GA). Reverse phase purifications employ C<sub>18</sub>-labeled silica gel (125 Å, 55–105 µm particle size) purchased from Waters Corporation (Milford, MA). Analytical thin-layered chromatography (TLC) was performed using glass plates pre-coated with silica gel (0.25 mm, 60 Å pore size) impregnated with a fluorescent indicator (254 nm). Preparative TLC (PTLC) was performed using glass plates pre-coated with silica gel (1.0 mm, 60 Å pore size) impregnated with a fluorescent indicator (254 nm). TLC plates were visualized by exposure to ultraviolet light (UV) and/or submersion in aqueous ceric ammonium molybdate solution (CAM), acidic *p*-anisaldehyde solution (PAA), or aqueous potassium permanganate solution (KMnO<sub>4</sub>), followed by brief heating on a hot plate (120 °C, 10–15 s).

**Materials.** Commercial solvents and reagents were used as received with the following exceptions. Benzene, dichloromethane, and toluene were purified according to the method of Pangborn et al.<sup>2</sup> Acetonitrile, *N,N*-di-*iso*-propylethylamine, and triethylamine were distilled from calcium hydride under an atmosphere of nitrogen immediately before use. Tetrahydrofuran was distilled from sodium/benzophenone under an atmosphere of nitrogen immediately before use. Methanol was distilled from magnesium methoxide under an atmosphere of nitrogen immediately before use. Chloromethyl methyl ether, hexamethylphosphoramide, and trimethylsilylchloride were distilled from calcium hydride and stored under nitrogen. 4-Å Molecular sieves were activated by heating overnight in vacuo (200 °C, 200 mTorr), stored in a gravity oven (120 °C), and were flame-dried in vacuo (100 mTorr) immediately before use. Tris(diethylamino)sulfonium difluorotrimethylsilicate [TASF(Et)] was prepared by a modification<sup>3</sup> of Middleton's procedure,<sup>4</sup> and was stored in a nitrogen-filled drybox at –20 °C. Polymer-bound triphenylphosphine (styrene-divinylbenzene copolymer, 20% cross-linked, 3.00 mmol triphenylphosphine/gram resin) was obtained from Strem Chemicals (Newburyport, MA) and was stored in a nitrogen-filled drybox. Manganese tris(hexafluoroacetylacetonate) was prepared according to the procedure of Mayer and co-workers<sup>5</sup> and was sublimed in vacuo (60–70 °C, 200 mTorr) immediately before use. Solutions of trifluoromethanesulfonyl azide in hexanes were prepared according to the procedure of Charette and co-workers.<sup>6</sup> The concentration of trifluoromethanesulfonyl azide was determined by <sup>19</sup>F NMR analysis using  $\alpha,\alpha,\alpha$ -trifluoroacetophenone as an internal standard (TfN<sub>3</sub>  $\delta$  = –76.34; PhCOCF<sub>3</sub>  $\delta$  = –72.11), as described by Wong and co-workers.<sup>7</sup> 2,3-Dibromo-5,6-dihydroxynaphthoquinone (**30**) was prepared according to the procedure of Huot and Brassard.<sup>8</sup> Mesitylaldehyde dimethyl acetal was prepared according to the procedure of Myers and co-workers.<sup>9</sup>

**Instrumentation.** Proton nuclear magnetic resonance spectra (<sup>1</sup>H NMR) were recorded at 400 or 500 MHz at 24 °C, unless otherwise noted. Chemical shifts are expressed in parts per million (ppm,  $\delta$  scale) downfield from tetramethylsilane and are referenced to residual protium in the NMR solvent ((CD<sub>3</sub>)<sub>2</sub>NCHO,  $\delta$  8.03; CHCl<sub>3</sub>,  $\delta$  7.26; C<sub>6</sub>HD<sub>5</sub>,  $\delta$  7.15; CHD<sub>2</sub>OD, 3.31). Data are represented as follows: chemical shift, multiplicity (s = singlet, d = doublet, t = triplet, q = quartet, m = multiplet and/or multiple resonances, br = broad, app = apparent), integration, coupling constant in Hertz, and assignment. Proton-decoupled carbon nuclear magnetic resonance spectra (<sup>13</sup>C NMR) were recorded at 100 or 125 MHz at 24 °C, unless otherwise noted. Chemical shifts are expressed in parts per million (ppm,  $\delta$  scale) downfield from tetramethylsilane and are referenced to the carbon resonances of the solvent [(CD<sub>3</sub>)<sub>2</sub>NCDO,  $\delta$  163.2; C<sub>6</sub>D<sub>6</sub>,  $\delta$  128.0; CDCl<sub>3</sub>,  $\delta$  77.0; CD<sub>3</sub>OD,  $\delta$  49.0]. Distortionless enhancement by polarization transfer spectra [DEPT (135)] were recorded at 100 or 125 MHz at 24 °C, unless otherwise noted. <sup>13</sup>C NMR and DEPT (135) data are combined and represented as follows: chemical shift, carbon type [obtained from DEPT (135) experiments]. Attenuated total reflectance Fourier transform infrared spectra (ATR-FTIR)

were obtained using a Thermo Electron Corporation Nicolet 6700 FTIR spectrometer referenced to a polystyrene standard. Data are represented as follows: frequency of absorption ( $\text{cm}^{-1}$ ), intensity of absorption (s = strong, m = medium, w = weak, br = broad). Analytical ultra high-performance liquid chromatography/mass spectrometry (UPLC/MS) was performed on a Waters UPLC/MS instrument equipped with a reverse-phase  $\text{C}_{18}$  column (1.7  $\mu\text{m}$  particle size, 2.1  $\times$  50 mm), dual atmospheric pressure chemical ionization (API)/electrospray (ESI) mass spectrometry detector, and photodiode array detector. Samples were eluted with a linear gradient of 20% acetonitrile–water containing 0.1% formic acid  $\rightarrow$  100% acetonitrile containing 0.1% formic acid over 3 min, followed by 100% acetonitrile containing 0.1% formic acid for 1 min, at a flow rate of 800  $\mu\text{L}/\text{min}$ . Analytical UPLC/MS data are represented as follows: retention time ( $t_{\text{R}}$ ) in minutes. Analytical chiral stationary phase HPLC was performed on an Agilent 1100 series HPLC instrument equipped with a CHIRALPAK® AD column and photodiode array detector. Samples were eluted with 0.5% ethanol–hexanes at a flow rate of 800  $\mu\text{L}/\text{min}$ . Analytical chiral stationary phase chromatographic data are represented as follows: retention time ( $t_{\text{R}}$ ) in minutes. High-resolution mass spectrometry (HRMS) were obtained at the W. M. Keck Foundation Biotechnology Resource Laboratory at Yale University or using a Waters UPLC/HRMS instrument equipped with a dual API/ESI high-resolution mass spectrometry detector and photodiode array detector. Unless otherwise noted, samples were eluted over a reverse-phase  $\text{C}_{18}$  column (1.7  $\mu\text{m}$  particle size, 2.1  $\times$  50 mm) with a linear gradient of 5% acetonitrile–water containing 0.1% formic acid  $\rightarrow$  95% acetonitrile–water containing 0.1% formic acid over 1.6 min, followed by 100% acetonitrile containing 0.1% formic acid for 1 min, at a flow rate of 600  $\mu\text{L}/\text{min}$ . Optical rotations were measured on a Perkin Elmer polarimeter equipped with a sodium (589 nm, D) lamp. Optical rotation data are represented as follows: specific rotation ( $[\alpha]_{\text{D}}^{\text{T}}$ ), concentration (mg/mL), and solvent.

## Synthetic Procedures.<sup>10</sup>

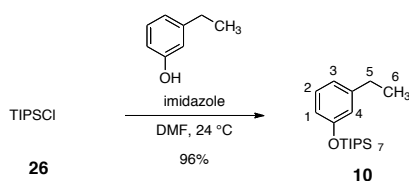

### Synthesis of *O*-(Tri-*iso*-propylsilyl)-3-ethylphenol (**10**):

3-Ethylphenol (149 mL, 1.22 mol, 1.15 equiv) and tri-*iso*-propylchlorosilane (**26**, 226 mL, 1.06 mol, 1 equiv) were added in sequence to a stirred solution of imidazole (145 g, 2.13 mol, 2.00 equiv) in *N,N*-dimethylformamide (500 mL) at 24 °C. The homogenous mixture gradually became biphasic, and the biphasic mixture was vigorously stirred for 20 h at 24 °C. The product mixture was poured into a separatory funnel that had been charged with 50% ether–hexanes (2 L) and 1 N aqueous sulfuric acid solution (3 L). The layers that formed were separated and the organic layer was washed sequentially with 1 N aqueous sodium hydroxide solution (3 × 1 L) and saturated aqueous sodium chloride solution (500 mL). The washed organic layer was dried over sodium sulfate, and the dried solution was filtered. The filtrate was concentrated to afford the silylether **10** as a clear, colorless liquid (293 g, 96%). The silyl ether was utilized without further purification.

$R_f = 0.62$  (1% ether–hexanes;  $\text{KMnO}_4$ ).  $^1\text{H NMR}$  (400 MHz,  $\text{CDCl}_3$ ),  $\delta$  7.12 (t, 1H,  $J = 8.0$  Hz,  $\text{H}_2$ ), 6.78 (d, 1H,  $J = 7.6$  Hz,  $\text{H}_1$ ), 6.74 (s, 1H,  $\text{H}_4$ ), 6.70 (dd, 1H,  $J = 8.0, 2.0$  Hz,  $\text{H}_3$ ), 2.60 (q, 2H,  $J = 8.0$  Hz,  $\text{H}_5$ ), 1.31–1.20 (m, 6H,  $\text{H}_6/\text{H}_7$ -methine), 1.12 (d, 18H,  $J = 8.0$  Hz,  $\text{H}_7$ -methyl).  $^{13}\text{C NMR}$  (100 MHz,  $\text{CDCl}_3$ ),  $\delta$  156.0 (C), 145.8 (C), 129.0 (CH), 120.5 (CH), 119.5 (CH), 117.0 (CH), 28.8 ( $\text{CH}_2$ ), 17.9 ( $6 \times \text{CH}_3$ ), 15.5 ( $\text{CH}_3$ ), 12.7 ( $3 \times \text{CH}$ ). IR (ATR-FTIR),  $\text{cm}^{-1}$ : 2944 (s), 2866 (s), 1603 (s), 1274 (s). HRMS-Cl( $m/z$ ):  $[\text{M}+\text{H}]^+$  calcd for  $\text{C}_{17}\text{H}_{31}\text{OSi}$ , 279.2139; found, 279.2138.



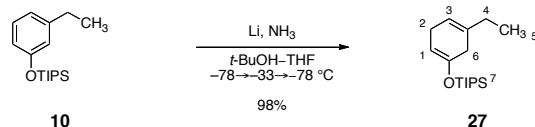

#### *Birch Reduction of the Enoxysilane 10:*

A 5-L 3-neck round-bottomed flask fitted with two septa and a dry-ice condenser was charged with tetrahydrofuran (900 mL) and *tert*-butyl alcohol (198 mL). The resulting mixture was cooled to  $-78$  °C. Dry ice and acetone were added to the reflux condenser, and then anhydrous ammonia (~1.6 L) was condensed into the cold reaction vessel. Finely divided lithium metal (13.6 g, 1.94 mol, 6.00 equiv) and the silyl ether **10** (90.0 g, 324 mmol, 1 equiv) were then added in sequence. Upon completion of the addition, the cooling bath was warmed to  $-30$  °C and the mixture was allowed to reflux. The reaction mixture was stirred for 50 min at reflux, and then was treated with additional *tert*-butyl alcohol (99 mL). The diluted mixture was stirred for 25 min at reflux and then was cooled to  $-78$  °C. The cooled mixture was treated with solid ammonium chloride (ca. 100 g) and was stirred at  $-78$  °C (external cooling) until the blue color discharged (ca. 10 min). The product mixture was warmed over 3 h to  $24$  °C (**Warning: Large quantities of ammonia gas are released on warming. This operation should be performed in a well-ventilated fume hood**). The warmed solution was diluted with water (600 mL), and the resulting biphasic mixture was transferred to a separatory funnel. The layers that formed were separated, and the aqueous layer was extracted with pentane ( $3 \times 600$  mL). The organic layers were combined and the combined organic layers were dried over sodium sulfate. The dried solution was filtered, and the filtrate was concentrated to afford the diene **27** as a clear, colorless oil (90.0 g, 98%).

$R_f = 0.58$  (1% ether–hexanes;  $\text{KMnO}_4$ ).  $^1\text{H}$  NMR (400 MHz,  $\text{CDCl}_3$ ),  $\delta$  5.40 (bs, 1H,  $\text{H}_3$ ), 4.89 (bs, 1H,  $\text{H}_1$ ), 2.76 (bs, 2H,  $\text{H}_2/\text{H}_6$ ), 2.66 (m, 2H,  $\text{H}_2/\text{H}_6$ ), 2.03 (q, 2H,  $J = 7.2$  Hz,  $\text{H}_4$ ), 1.21 (m, 3H,  $\text{H}_{7\text{-methine}}$ ), 1.17 (d, 18H,  $J = 6.8$  Hz,  $\text{H}_{7\text{-methyl}}$ ), 1.07 (t, 3H,  $J = 7.2$  Hz,  $\text{H}_5$ ).  $^{13}\text{C}$  NMR (100 MHz,  $\text{CDCl}_3$ ),  $\delta$  148.2 (C), 136.4 (C), 116.8 (CH), 100.1 (CH), 33.7 ( $\text{CH}_2$ ), 29.6 ( $\text{CH}_2$ ), 27.2 ( $\text{CH}_2$ ), 18.0 ( $6 \times \text{CH}_3$ ), 12.7 ( $3 \times \text{CH}$ ), 12.0 ( $\text{CH}_3$ ). IR (ATR-FTIR),  $\text{cm}^{-1}$ : 2944 (s), 2866 (s), 1697 (m), 1665 (m), 1216 (s). HRMS-Cl( $m/z$ ):  $[\text{M}+\text{H}]^+$  calcd for  $\text{C}_{17}\text{H}_{33}\text{OSi}$ , 281.2296; found, 281.2294.

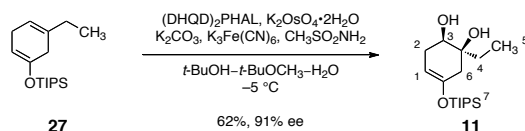

*Dihydroxylation of the Cyclohexadiene 27:*

(DHQD)<sub>2</sub>PHAL (1.67 g, 2.14 mmol, 0.01 equiv), potassium osmate dihydrate (788 mg, 2.14 mmol, 0.01 equiv), methanesulfonamide (20.4 g, 214 mmol, 1.00 equiv), potassium carbonate (88.8 g, 643 mmol, 3.01 equiv) and potassium ferricyanide (212 g, 644 mmol, 3.01 equiv) were added in sequence to a mixture of *tert*-butylmethyl ether (300 mL), *tert*-butyl alcohol (550 mL), and water (850 mL) at 24 °C. The resulting mixture stirred for 15 min at 24 °C and then was cooled to –5 °C. The cyclohexadiene **27** (60.0 g, 214 mmol, 1 equiv) was then added. The reaction mixture was stirred for 40 h at –5 °C. The product mixture was transferred to a separatory funnel that had been charged with ethyl acetate (1 L) and distilled water (2 L). The layers that formed were separated, and the aqueous layer was extracted with ethyl acetate (3 × 1 L). The organic layers were combined and the combined organic layers were washed sequentially with 10% aqueous sodium thiosulfate solution (w/v, 500 mL), saturated aqueous sodium bicarbonate solution (500 mL), and saturated aqueous sodium chloride solution (500 mL). The washed organic layer was dried over sodium sulfate, and the dried solution was filtered. The filtrate was concentrated and the residue obtained was purified by flash-column chromatography (eluting with 15% ethyl acetate–hexanes initially, grading to 50% ethyl acetate–hexanes, one step) to afford the diol **11** as a clear, colorless oil (42.0 g, 62%). The enantiomeric excess of the diol **11** was determined to be 91% by chiral stationary phase HPLC analysis of the enone **28** (vide infra).

$R_f = 0.35$  (30% ethyl acetate–hexanes;  $\text{KMnO}_4$ ).  $^1\text{H NMR}$  (400 MHz,  $\text{CDCl}_3$ ),  $\delta$  4.68 (t, 1H,  $J = 4.0$  Hz,  $\text{H}_1$ ), 3.63 (dd, 1H,  $J = 11.6, 6.0$  Hz,  $\text{H}_3$ ), 2.34 (m, 1H,  $\text{H}_2$ ), 2.20 (m, 3H,  $\text{H}_2/2 \times \text{H}_6$ ), 2.02 (s, 1H, OH), 1.89 (d, 1H,  $J = 6.8$  Hz, OH), 1.57 (m, 2H,  $\text{H}_4$ ), 1.13 (m, 3H,  $\text{H}_7$ -methine), 1.07 (d, 18H,  $J = 6.0$  Hz,  $\text{H}_7$ -methyl), 0.95 (t, 3H,  $J = 7.6$  Hz,  $\text{H}_5$ ).  $^{13}\text{C NMR}$  (125 MHz,  $\text{CDCl}_3$ ),  $\delta$  148.6 (C), 98.5 (CH), 74.2 (C), 71.2 (CH), 39.5 (CH<sub>2</sub>), 30.2 (CH<sub>2</sub>), 29.8 (CH<sub>2</sub>), 18.4 (6 × CH<sub>3</sub>), 13.0 (3 × CH), 7.7 (CH<sub>3</sub>). IR (ATR-FTIR),  $\text{cm}^{-1}$ : 3391 (s), 2942 (s), 2866 (s), 1673 (s), 1196 (s). HRMS-CI( $m/z$ ):  $[\text{M}+\text{H}]^+$  calcd for  $\text{C}_{17}\text{H}_{35}\text{O}_3\text{Si}$ , 315.2350; found, 315.2350.

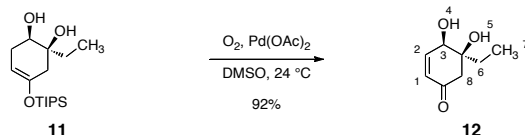

*Oxidation of the Diol 11:*

A 500-mL round-bottomed flask was charged sequentially with a Teflon-coated stirbar, the diol **11** (9.60 g, 30.6 mmol, 1 equiv), and dimethyl sulfoxide (15.3 mL). Palladium(II) acetate (685 mg, 3.06 mmol, 0.10 equiv) was then added. The headspace in the flask was purged with dioxygen by three sequential evacuation–refill cycles ( $P < 700$  mTorr for each evacuation; a balloon of dioxygen was used to fill the flask). The resulting mixture was stirred under a balloon of dioxygen for 10 h at 24 °C. The headspace in the flask was then purged again three times with dioxygen, and stirring was continued for an additional 7 h at 24 °C under a balloon of dioxygen. The product mixture was purified directly by flash-column chromatography (eluting with 45% acetone–hexanes) to afford the enone **12** as a viscous, colorless oil (4.41 g, 92%).

$R_f = 0.20$  (70% ethyl acetate–hexanes; UV, PAA).  $^1\text{H NMR}$  (500 MHz,  $\text{CDCl}_3$ ),  $\delta$  6.74 (dd, 1H,  $J = 10.0, 2.5$  Hz,  $\text{H}_2$ ), 6.04 (ddd, 1H,  $J = 11.0, 2.0, 1.0$  Hz,  $\text{H}_1$ ), 4.38 (dt, 1H,  $J = 9.0, 2.5$  Hz,  $\text{H}_3$ ), 2.76 (d, 1H,  $J = 8.5$  Hz,  $\text{H}_4$ ), 2.64 (dd, 1H,  $J = 16.5, 0.5$  Hz,  $\text{H}_8$ ), 2.48 (d, 1H,  $J = 16.5$  Hz,  $\text{H}_8$ ), 2.26 (s, 1H,  $\text{H}_5$ ), 1.72 (app q, 2H,  $J = 7.5$  Hz,  $\text{H}_6$ ), 0.97 (t, 3H,  $J = 8.0$  Hz,  $\text{H}_7$ ).  $^{13}\text{C NMR}$  (125 MHz,  $\text{CDCl}_3$ ),  $\delta$  198.3 (C), 149.8 (CH), 128.9 (CH), 76.8 (C), 70.1 (CH), 46.1 ( $\text{CH}_2$ ), 31.2 ( $\text{CH}_2$ ), 7.9 ( $\text{CH}_3$ ). IR (NaCl, thin film),  $\text{cm}^{-1}$ : 3407 (s), 1675 (m), 1463 (w), 1385 (w). HRMS-Cl ( $m/z$ ):  $[\text{M} + \text{H}]^+$  calcd for  $\text{C}_8\text{H}_{13}\text{O}_3$ , 157.0859; found, 157.0855.

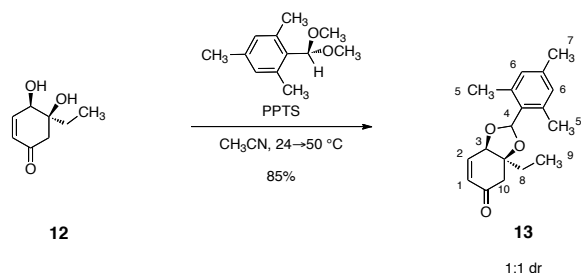

### Mesityl Protection of Enone **12**:

Mesityl dimethylacetal (11.0 g, 56.5 mmol, 2.01 equiv) and pyridinium *para*-toluenesulfonate (710 mg, 2.83 mmol, 0.10 equiv) were added in sequence to a stirred solution of the enone **12** (4.39 g, 28.1 mmol, 1 equiv) in acetonitrile (140 mL) at 24 °C. The resulting mixture was stirred for 1 h at 24 °C, and then was placed in an oil bath that had been preheated to 50 °C. The reaction mixture was stirred and heated for 45 min at 50 °C. The product solution was cooled over 10 min to 24 °C. Triethylamine (8.00 mL, 57.8 mmol, 2.06 eq) was then added to the cooled solution. The resulting mixture was poured into a separatory funnel that had been charged with saturated aqueous sodium bicarbonate solution (400 mL). The layers that formed were separated, and the aqueous layer was extracted with ethyl acetate (3 × 250 mL). The organic layers were combined and the combined organic layers were dried over sodium sulfate. The dried solution was filtered and the filtrate was concentrated. The residue obtained was purified by flash-column chromatography (eluting with 25% ether–hexanes) to afford the acetal **13** as a clear, colorless oil (6.82 g, 85%, 1:1 mixture of diastereomers).

$R_f$  = 0.76 (60% ethyl acetate–hexanes; UV, PAA).  $^1\text{H}$  NMR (500 MHz,  $\text{CDCl}_3$ ; 1:1 mixture of diastereomers, \* denotes second diastereomer),  $\delta$  6.90–6.86 (m, 2H,  $\text{H}_2/\text{H}_{2*}$ ), 6.82 (s, 2H,  $\text{H}_6$ ), 6.81 (s, 2H,  $\text{H}_{6*}$ ), 6.30–6.27 (m, 3H,  $\text{H}_4/\text{H}_{4*}/\text{H}_1$ ), 6.20 (d, 1H,  $J = 10.5$  Hz,  $\text{H}_{1*}$ ), 4.53 (d, 1H,  $J = 4.0$  Hz,  $\text{H}_3$ ), 4.46 (d, 1H,  $J = 4.0$  Hz,  $\text{H}_{3*}$ ), 3.01 (d, 1H,  $J = 17.0$  Hz,  $\text{H}_{10*}$ ), 2.93 (d, 1H,  $J = 16.5$  Hz,  $\text{H}_{10}$ ), 2.72 (d, 1H,  $J = 16.0$  Hz,  $\text{H}_{10}$ ), 2.70 (d, 2H,  $J = 16.5$  Hz,  $\text{H}_{10*}$ ), 2.42 (s, 6H,  $\text{H}_5$ ), 2.37 (s, 6H,  $\text{H}_{5*}$ ), 2.25 (s, 3H,  $\text{H}_7$ ), 2.24 (s, 3H,  $\text{H}_{7*}$ ), 2.04–1.91 (m, 2H,  $\text{H}_8/\text{H}_{8*}$ ), 1.89–1.81 (m, 1H,  $\text{H}_8$ ), 1.80–1.73 (m, 1H,  $\text{H}_{8*}$ ), 1.04–0.97 (m, 6H,  $\text{H}_9/\text{H}_{9*}$ ).  $^{13}\text{C}$  NMR (125 MHz,  $\text{CDCl}_3$ ; 1:1 mixture of diastereomers, \* denotes second diastereomer),  $\delta$  197.4 (C), 196.7 (C\*), 142.9 (CH), 142.6 (CH\*), 139.1 (C), 139.0 (C\*), 137.9 (1 × C, 1 × C\*), 131.6 (CH), 130.5 (CH\*), 130.3 (2 × CH), 130.2 (2 × CH\*), 127.5 (C), 126.9 (C\*), 100.2 (1 × CH, 1 × CH\*), 82.3 (2 × C), 81.1 (2 × C\*), 75.2 (CH), 74.9 (CH\*), 45.0 ( $\text{CH}_2$ ), 43.6 ( $\text{CH}_2^*$ ), 32.9 ( $\text{CH}_2$ ), 31.1 ( $\text{CH}_2^*$ ), 20.9 (2 ×  $\text{CH}_3$ ), 20.5 (2 ×  $\text{CH}_3^*$ ), 20.3 (1 ×  $\text{CH}_3$ , 1 ×  $\text{CH}_3^*$ ), 8.2 ( $\text{CH}_3$ ), 7.3 ( $\text{CH}_3^*$ ). IR (ATR-FTIR),  $\text{cm}^{-1}$ : 2970 (w), 1687 (s), 1448 (m). HRMS-ESI ( $m/z$ ):  $[\text{M} + \text{Na}]^+$  calcd for  $\text{C}_{18}\text{H}_{22}\text{O}_3\text{Na}$ , 309.1462; found, 309.1461.

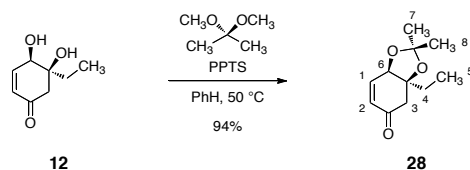

*Synthesis of the Acetonide 28:*

2,2-Dimethoxypropane (1.22 mL, 10.0 mmol, 5.00 equiv) and pyridinium *para*-toluenesulfonate (50.0 mg, 200  $\mu$ mol, 0.10 equiv) were added in sequence to a stirred solution of the enone **12** (312 mg, 2.00 mmol, 1 equiv) in benzene (20 mL) at 24 °C. The resulting mixture was stirred for 5 min at 24 °C and then was heated to 50 °C. The reaction mixture was stirred and heated for 1 h at 50 °C. The product mixture was cooled to 24 °C and the cooled solution was diluted with distilled water (20 mL). The diluted solution was transferred to a separatory funnel and the layers that formed were separated. The aqueous layer was extracted with ethyl acetate (6  $\times$  30 mL). The organic layers were combined and the combined organic layers were dried over sodium sulfate. The dried solution was filtered, and the filtrate was concentrated. The residue obtained was purified by flash-column chromatography (eluting with 70% ethyl acetate–hexanes) to furnish the acetonide **28** as a white crystalline solid (374 mg, 94%).

$R_f$  = 0.30 (20% ethyl acetate–hexanes; UV, PAA).  $^1\text{H}$  NMR (500 MHz,  $\text{CDCl}_3$ ),  $\delta$  6.78 (dd, 1H,  $J$  = 10.0, 3.5 Hz,  $\text{H}_1$ ), 6.11 (d, 1H,  $J$  = 10.5 Hz,  $\text{H}_2$ ), 4.46 (dd, 1H,  $J$  = 3.5, 0.5 Hz,  $\text{H}_6$ ), 2.88 (d, 1H,  $J$  = 16.5 Hz,  $\text{H}_3$ ), 2.51 (d, 1H,  $J$  = 16.5 Hz,  $\text{H}_3$ ), 1.85–1.74 (m, 1H,  $\text{H}_4$ ), 1.71–1.60 (m, 1H,  $\text{H}_4$ ), 1.44 (s, 3H,  $\text{H}_7/\text{H}_8$ ), 1.39 (s, 3H,  $\text{H}_7/\text{H}_8$ ), 0.97 (t, 3H,  $J$  = 7.5 Hz,  $\text{H}_5$ ).  $^{13}\text{C}$  NMR (125 MHz,  $\text{CDCl}_3$ ),  $\delta$  197.1 (C), 144.1 (CH), 130.6 (CH), 110.0 (C), 83.2 (CH), 74.7 (C), 44.7 (CH<sub>2</sub>), 31.4 (CH<sub>2</sub>), 28.4 (CH<sub>3</sub>), 28.3 (CH<sub>3</sub>), 7.7 (CH<sub>3</sub>). IR (NaCl, thin film),  $\text{cm}^{-1}$ : 2989 (s), 2880 (w), 1691 (s), 1389 (m), 1164 (w), 896 (w). HRMS-Cl ( $m/z$ ): [ $\text{M} + \text{H}$ ] $^+$  calcd for  $\text{C}_{11}\text{H}_{17}\text{O}_3$ , 197.1172; found, 197.1168.

The enantiomeric excess of the acetonide **28** was determined to be 91% by chiral stationary phase HPLC analysis ( $t_{\text{R}(\text{major})}$  = 31.249 min;  $t_{\text{R}(\text{minor})}$  = 10.700 min].

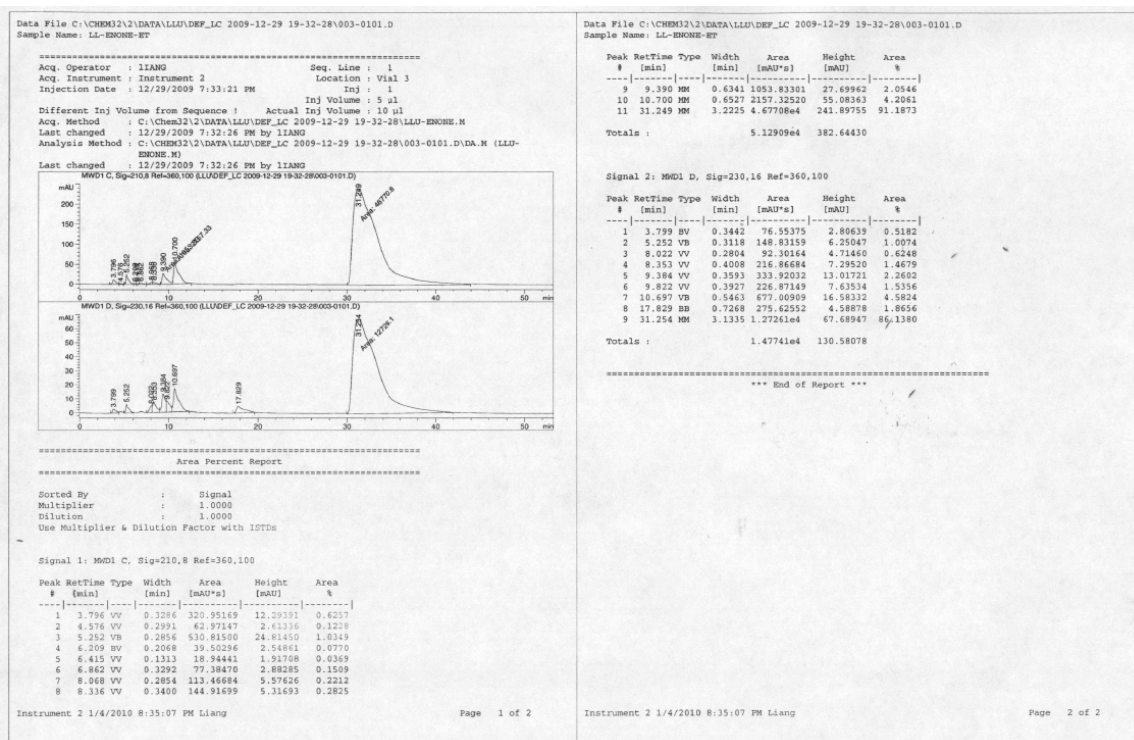

### HPLC analysis of authentic stereoisomer, synthesized from (+)-quinic acid.<sup>11</sup>

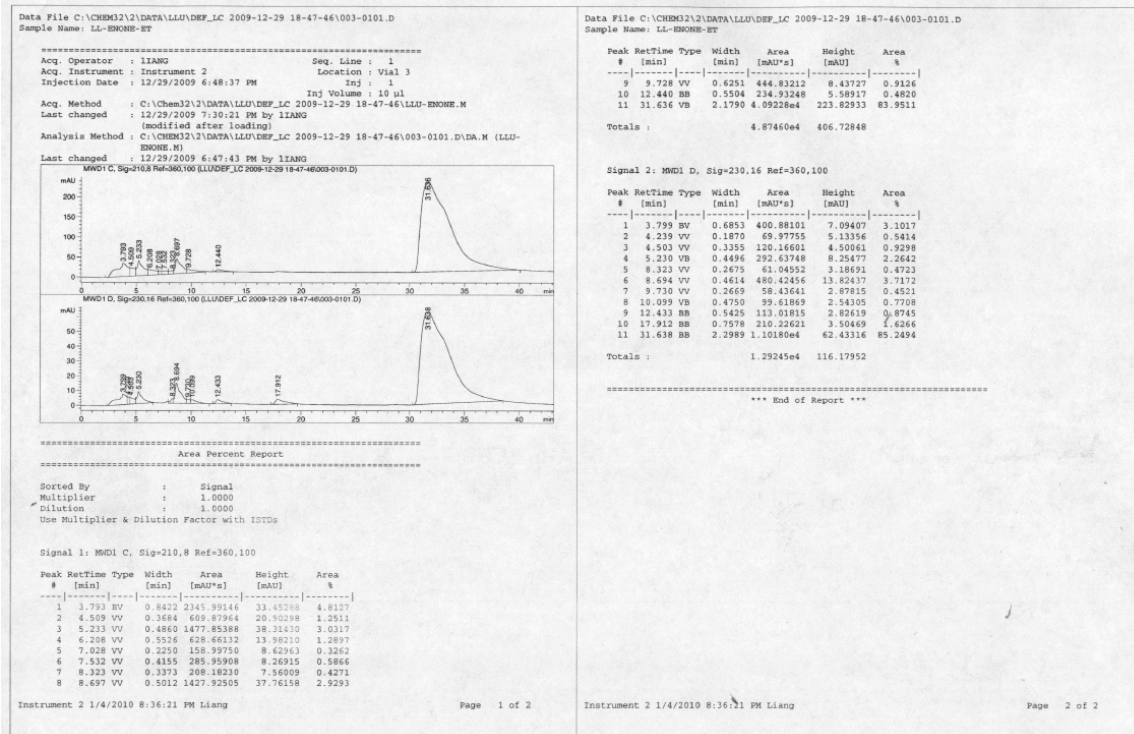



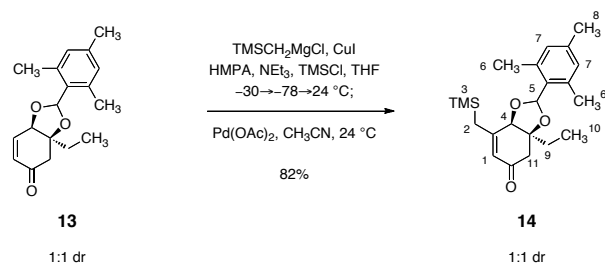

*Synthesis of the  $\beta$ -(Trimethylsilylmethyl)- $\alpha,\beta$ -unsaturated Ketone **14**:*

Cuprous iodide (101 mg, 534  $\mu\text{mol}$ , 0.10 equiv) was added to a stirred solution of trimethylsilylmethylmagnesium chloride in ether (1.00 M, 5.88 mL, 5.88 mmol, 1.10 equiv) at 24  $^\circ\text{C}$ . The resulting solution was cooled to  $-30 \text{ }^\circ\text{C}$ , to afford a cloudy suspension. A solution of the cyclohexenone **13** [1.53 g, 5.34 mmol, 1 equiv; dried by azeotropic distillation with benzene (2 mL)] in tetrahydrofuran (1.0 mL) was then added dropwise via cannula. The flask containing the cyclohexenone **13** was rinsed with tetrahydrofuran ( $2 \times 1.3 \text{ mL}$ ) and the rinses were added to the reaction vessel via cannula. The reaction mixture was cooled to  $-50 \text{ }^\circ\text{C}$  and then was stirred at this temperature for 30 min. The mixture was then was cooled to  $-60 \text{ }^\circ\text{C}$  and hexamethylphosphoramide (1.02 mL, 5.88 mmol, 1.10 equiv), triethylamine (1.48 mL, 10.7 mmol, 2.00 equiv), and trimethylsilyl chloride (982  $\mu\text{L}$ , 10.7 mmol, 2.00 equiv) were added in sequence to the cooled solution. The resulting mixture was further cooled to  $-78 \text{ }^\circ\text{C}$ , and was stirred at this temperature for 1 h. The product mixture was warmed over 10 min to 24  $^\circ\text{C}$ , and the warmed solution was stirred for 10 min at 24  $^\circ\text{C}$ . The product mixture was diluted with ether (100 mL) and the diluted solution was poured into a separatory funnel that had been charged with saturated aqueous sodium bicarbonate solution (80 mL). The layers that formed were separated, and the aqueous layer was extracted with ether (100 mL). Each organic layer was washed separately with saturated aqueous sodium bicarbonate solution ( $2 \times 50 \text{ mL}$ ) and saturated aqueous sodium chloride solution (50 mL). The organic layers were combined and the combined organic layers were dried over sodium sulfate. The dried solution was filtered and the filtrate was concentrated. The residue obtained was dissolved in ether (20 mL) and the resulting solution was eluted over a pad of silica gel ( $2 \times 5 \text{ cm}$ ). The pad of silica gel was washed with ether ( $3 \times 10 \text{ mL}$ ), and the filtrates were combined. The combined filtrates were concentrated to afford the enoxysilane **29** as a clear, colorless oil (2.39 g).

Palladium(II) acetate (1.32 g, 5.87 mmol, 1.10 equiv) was added to a stirred solution of the enoxysilane **29** (2.39 g, 5.34 mmol, 1 equiv) in acetonitrile (53 mL) at 24  $^\circ\text{C}$ . The resulting black mixture was stirred for 12 h at 24  $^\circ\text{C}$ . The product mixture was diluted with ether (100 mL) and the diluted solution was filtered through a pad of celite ( $5 \times 5 \text{ cm}$ ). The celite pad was washed with ether ( $3 \times 25 \text{ mL}$ ) and the filtrates were combined. The combined filtrates were concentrated to dryness, and the residue obtained was purified by flash-column chromatography (eluting with 20% ether–hexanes) to afford the  $\beta$ -(trimethylsilylmethyl)- $\alpha,\beta$ -unsaturated ketone **14** as a clear, colorless oil (1.63 g, 82%, 1:1 mixture of diastereomers).

$R_f = 0.33$  (20% ether–hexanes; UV, PAA).  $^1\text{H NMR}$  (400 MHz,  $\text{CDCl}_3$ ; 1:1 mixture of diastereomers, \* denotes second diastereomer),  $\delta$  6.83 (s, 2H,  $\text{H}_7$ ), 6.81 (s, 2H,  $\text{H}_7^*$ ), 6.32 (s, 1H,  $\text{H}_5$ ), 6.26 (s, 1H,  $\text{H}_5^*$ ), 5.95 (s, 1H,  $\text{H}_1$ ), 5.91 (s, 1H,  $\text{H}_1^*$ ), 4.27 (s, 1H,  $\text{H}_4$ ), 4.23 (s, 1H,  $\text{H}_4^*$ ), 2.94 (d, 1H,  $J = 16.8 \text{ Hz}$ ,  $\text{H}_2^*$ ), 2.85 (d, 1H,  $J = 16.0 \text{ Hz}$ ,  $\text{H}_2$ ), 2.68–2.63 (m, 2H,  $\text{H}_2/\text{H}_2^*$ ), 2.43 (s, 6H,  $\text{H}_6$ ), 2.38 (s, 6H,  $\text{H}_6^*$ ), 2.25 (s, 3H,  $\text{H}_8$ ), 2.24 (s, 3H,  $\text{H}_8^*$ ), 2.15–2.10 (m, 2H,  $\text{H}_{11}/\text{H}_{11}^*$ ), 2.00–1.81 (m, 5H,  $\text{H}_{11}/2 \times \text{H}_9/\text{H}_{11}^*/\text{H}_9^*$ ), 1.79–1.70 (m, 1H,  $\text{H}_9^*$ ), 1.00 (app t, 6H,  $J = 7.6 \text{ Hz}$ ,  $\text{H}_{10}/\text{H}_{10}^*$ ), 0.11 (bs, 18H,  $\text{H}_3/\text{H}_3^*$ ).  $^{13}\text{C NMR}$  (100 MHz,  $\text{CDCl}_3$ ; 1:1 mixture of diastereomers, \* denotes second diastereomer),  $\delta$  196.4 (C), 195.9 (C\*), 159.0 (C), 158.6 (C\*), 139.0 (C), 138.9 (C\*), 137.9 ( $2 \times \text{C}$ ), 137.8 ( $2 \times \text{C}^*$ ), 130.2 ( $2 \times \text{CH}$ ,  $2 \times \text{CH}^*$ ), 127.7 (C), 126.9 (C\*),



125.7 (CH), 125.3 (CH\*), 99.8 (CH), 99.7 (CH\*), 82.1 (C), 80.6 (C\*), 79.3 (CH), 79.0 (CH\*), 44.6 (CH<sub>2</sub>), 42.1 (CH<sub>2</sub>\*), 32.5 (CH<sub>2</sub>), 31.5 (CH<sub>2</sub>\*), 27.7 (CH<sub>2</sub>), 27.2 (CH<sub>2</sub>\*), 20.8 (1 × CH<sub>3</sub>, 1 × CH<sub>3</sub>\*), 20.2 (2 × CH<sub>3</sub>, 2 × CH<sub>3</sub>\*), 8.1 (CH<sub>3</sub>), 7.4 (CH<sub>3</sub>\*), -1.1 (3 × CH<sub>3</sub>, 3 × CH<sub>3</sub>\*). IR (ATR-FTIR), cm<sup>-1</sup>: 1663 (m), 1614 (w), 905 (s). HRMS-CI(m/z): [M+H]<sup>+</sup> calcd for C<sub>22</sub>H<sub>33</sub>O<sub>3</sub>Si, 373.2194; found, 373.2197.

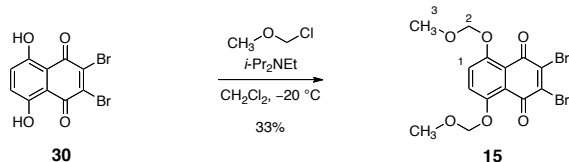

*Synthesis of 2,3-Dibromo-5,8-di(methoxymethoxy)naphthoquinone (15):*

Chloromethyl methyl ether (7.50 mL, 101 mmol, 4.83 equiv) was added to a solution of 2,3-dibromo-5,8-dihydroxynaphthoquinone (**30**, 7.00 g, 20.2 mmol, 1 equiv) in dichloromethane (290 mL) at  $-20\text{ }^\circ\text{C}$ . *N,N*-Di-*iso*-propylethylamine (25.4 mL, 144 mmol, 7.00 eq) was added dropwise via syringe pump over 4 h to the cold mixture. Upon completion of the addition, the reaction mixture was stirred for 8 h at  $-20\text{ }^\circ\text{C}$ . The product mixture was diluted with saturated aqueous sodium bicarbonate solution (200 mL) and the diluted solution was warmed over 20 min to  $24\text{ }^\circ\text{C}$ . The warmed biphasic mixture was transferred to a separatory funnel and the layers that formed were separated. The aqueous layer was extracted with dichloromethane ( $2 \times 50\text{ mL}$ ) and the organic layers were combined. The combined organic layers were dried over sodium sulfate and the dried solution was filtered. The filtrate was concentrated and the residue obtained was purified by flash-column chromatography on deactivated silica gel (6% w/w distilled water; eluting with 30% ethyl acetate–hexanes initially, grading to 7% ethyl acetate–dichloromethane, one step) to afford the quinone **15** as a red solid (2.90 g, 33%).

$R_f = 0.74$  (40% ethyl acetate–hexanes; UV, CAM).  $^1\text{H NMR}$  (500 MHz,  $\text{CDCl}_3$ ):  $\delta$  7.52 (s, 2H,  $\text{H}_1$ ), 5.29 (s, 4H,  $\text{H}_2$ ), 3.54 (s, 6H,  $\text{H}_3$ ).  $^{13}\text{C NMR}$  (125 MHz,  $\text{CDCl}_3$ ):  $\delta$  174.7 (C), 153.0 (C), 141.8 (C), 125.1 (CH), 120.7 (C), 95.8 ( $\text{CH}_2$ ), 56.7 ( $\text{CH}_3$ ). IR (ATR-FTIR),  $\text{cm}^{-1}$ : 2936 (w), 1665 (m), 1144 (m), 896 (m). HRMS-CI ( $m/z$ ):  $[\text{M} + \text{H}]^+$  calcd for  $\text{C}_{14}\text{H}_{13}^{79/79;79/81;81/81}\text{Br}_2\text{O}_6$ , 434.9079/436.9058/438.9038; found, 434.9071/436.9042/438.9020.

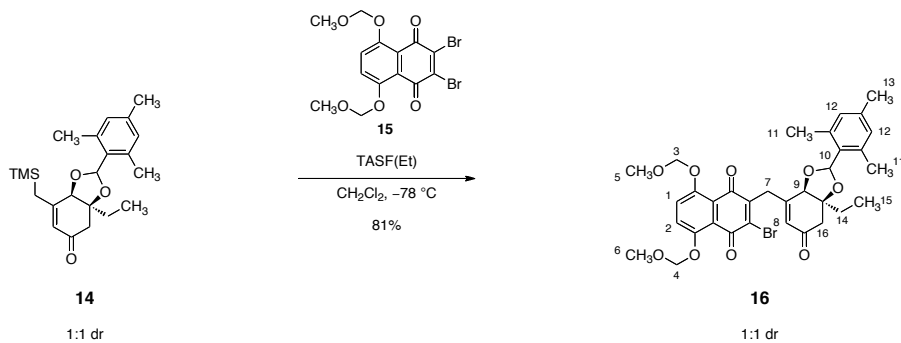

*Coupling of 2,3-Dibromo-5,8-di(methoxymethoxy)naphthoquinone (15) And The  $\beta$ -(Trimethylsilylmethyl)- $\alpha,\beta$ -unsaturated Ketone 14:*

A neat mixture of 2,3-dibromo-5,8-di(methoxymethoxy)naphthoquinone (**15**, 4.77 g, 10.9 mmol, 4.00 equiv) and the  $\beta$ -(trimethylsilylmethyl)- $\alpha,\beta$ -unsaturated ketone **14** (1.02 g, 2.74 mmol, 1 equiv) was prepared in a 1-L round-bottomed flask. The mixture was dried by azeotropic distillation with benzene (3  $\times$  20 mL). The dried mixture was dissolved in dichloromethane (690 mL) and was stirred at 24  $^{\circ}$ C until homogenous (ca. 10 min). The resulting red, homogenous mixture was cooled to  $-78^{\circ}$  C. A solution of TASF(Et) (1.48 g, 4.11 mmol, 1.50 equiv) in dichloromethane (9.0 mL) was added dropwise via cannula to the cold, stirred solution. The resulting black mixture was stirred for 15 min at  $-78^{\circ}$  C. The cold product mixture was diluted with 0.1 M aqueous sodium phosphate buffer solution (pH 7, 400 mL). The diluted solution was warmed over 45 min to 24  $^{\circ}$ C. The resulting biphasic mixture was transferred to a separatory funnel and the layers that formed were separated. The aqueous layer was extracted with dichloromethane (3  $\times$  100 mL). The organic layers were combined and the combined organic layers were dried over sodium sulfate. The dried solution was filtered and the filtrate was concentrated. The residue obtained was diluted with dichloromethane (100 mL) and the diluted solution was filtered to partially remove unreacted quinone **15**. The filtrate was concentrated and the residue obtained was purified by flash-column chromatography (eluting with 5% ethyl acetate–dichloromethane initially, grading to 40% ethyl acetate–dichloromethane, one step) to afford the coupled product **16** as a red solid (1.45 g, 81%, 1:1 mixture of diastereomers).

$R_f = 0.55$  (20% ethyl acetate–hexanes; UV, PAA).  $^1\text{H}$  NMR (400 MHz,  $\text{CDCl}_3$ ; 1:1 mixture of diastereomers, \* denotes second diastereomer),  $\delta$  7.40 (app s, 2H,  $\text{H}_1/\text{H}_2$ ), 7.39 (d, 1H,  $J = 9.2$  Hz,  $\text{H}_{1^*}/\text{H}_{2^*}$ ), 7.37 (d, 1H,  $J = 9.2$  Hz,  $\text{H}_{1^*}/\text{H}_{2^*}$ ), 6.74 (s, 2H,  $\text{H}_{12}$ ), 6.69 (s, 2H,  $\text{H}_{12^*}$ ), 6.20 (bs, 2H,  $\text{H}_{10}/\text{H}_{10^*}$ ), 5.93 (s, 1H,  $\text{H}_8$ ), 5.87 (s, 1H,  $\text{H}_{8^*}$ ), 5.24–5.15 (m, 8H,  $\text{H}_3/\text{H}_4/\text{H}_{3^*}/\text{H}_{4^*}$ ), 4.53 (s, 1H,  $\text{H}_9$ ), 4.45 (s, 1H,  $\text{H}_{9^*}$ ), 4.04–3.96 (m, 2H,  $\text{H}_7/\text{H}_{7^*}$ ), 3.71–3.65 (m, 2H,  $\text{H}_7/\text{H}_{7^*}$ ), 3.50 (bs, 6H,  $\text{H}_6/\text{H}_5/\text{H}_{6^*}/\text{H}_{5^*}$ ), 3.47 (s, 3H,  $\text{H}_{6^*}/\text{H}_{5^*}$ ), 3.46 (s, 3H,  $\text{H}_6/\text{H}_5$ ), 2.90 (d, 1H,  $J = 16.8$  Hz,  $\text{H}_{16^*}$ ), 2.85 (d, 1H,  $J = 16.4$  Hz,  $\text{H}_{16}$ ), 2.63–2.59 (m, 2H,  $\text{H}_{16}/\text{H}_{16^*}$ ), 2.35 (s, 6H,  $\text{H}_{11}$ ), 2.27 (s, 6H,  $\text{H}_{11^*}$ ), 2.19 (s, 3H,  $\text{H}_{13}$ ), 2.17 (s, 3H,  $\text{H}_{13^*}$ ), 2.00–1.91 (m, 2H,  $\text{H}_{14}/\text{H}_{14^*}$ ), 1.87–1.79 (m, 1H,  $\text{H}_{14}$ ), 1.78–1.69 (m, 1H,  $\text{H}_{14^*}$ ), 0.95 (t, 3H,  $J = 7.2$  Hz,  $\text{H}_{15^*}$ ), 0.93 (t, 3H,  $J = 7.6$  Hz,  $\text{H}_{15}$ ).  $^{13}\text{C}$  NMR (100 MHz,  $\text{CDCl}_3$ ; 1:1 mixture of diastereomers, \* denotes second diastereomer),  $\delta$  196.5 (C), 196.1 (C\*), 180.1 (C), 180.0 (C\*), 175.9 (1  $\times$  C, 1  $\times$  C\*), 152.8 (C), 152.7 (C\*), 152.3 (2  $\times$  C), 152.2 (C\*), 152.1 (C\*), 146.5 (C), 146.4 (C\*), 139.9 (2  $\times$  C), 138.7 (2  $\times$  C\*), 137.7 (2  $\times$  C), 137.6 (2  $\times$  C\*), 129.9 (2  $\times$  CH, 2  $\times$  CH\*), 127.8 (CH), 127.1 (CH\*), 127.0 (C), 126.7 (C\*), 124.6 (2  $\times$  CH), 124.5 (2  $\times$  CH\*), 121.1 (C), 120.9 (C\*), 120.8 (1  $\times$  C, 1  $\times$  C\*), 100.0 (CH), 99.9 (CH\*), 95.6 (CH<sub>2</sub>), 95.5 (CH<sub>2</sub>\*), 95.4 (1  $\times$  CH<sub>2</sub>, 1  $\times$  CH<sub>2</sub>\*), 82.1 (C), 81.1 (C\*), 78.4 (CH), 78.3 (CH\*), 56.4 (2  $\times$  CH<sub>3</sub>), 56.3 (2  $\times$  CH<sub>3</sub>\*), 44.5 (CH<sub>2</sub>), 43.0 (CH<sub>2</sub>\*), 36.3 (CH<sub>2</sub>), 36.0 (CH<sub>2</sub>\*), 33.0 (CH<sub>2</sub>), 30.9 (CH<sub>2</sub>\*), 20.7 (1  $\times$  CH<sub>3</sub>, 1  $\times$  CH<sub>3</sub>\*), 20.2 (2  $\times$  CH<sub>3</sub>), 20.1 (2  $\times$  CH<sub>3</sub>\*), 8.0 (CH<sub>3</sub>), 7.2 (CH<sub>3</sub>\*). IR (ATR-FTIR),  $\text{cm}^{-1}$ : 1670 (s), 1467 (s), 1255 (s), 1151 (s). HRMS-CI( $m/z$ ):  $[\text{M} + \text{Na}]^+$  calcd for  $\text{C}_{33}\text{H}_{35}\text{Br}^{79/81}\text{O}_9\text{Na}$ , 677.1357/679.1337; found, 677.1359/679.1356.

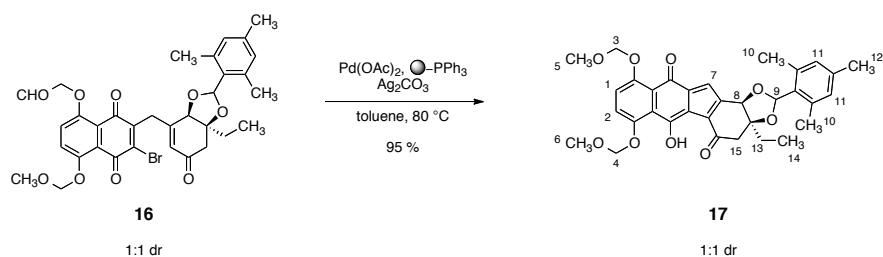

### Cyclization of the Coupled Product **16**:

A mixture of palladium(II) acetate (485 mg, 2.17 mmol, 1.00 equiv), polymer-supported triphenylphosphine (1.08 g, 3.25 mmol triphenylphosphine, 1.50 equiv), and silver(I) carbonate (1.19 g, 4.33 mmol, 2.00 equiv) were added to a stirred solution of the coupled product **16** [1.42 g, 2.17 mmol, 1 equiv; dried by azeotropic distillation with benzene (5 mL)] in toluene (110 mL) at 24 °C. The resulting mixture was placed in an oil bath that had been preheated to 80 °C. The reaction mixture was stirred and heated for 2 h at 80 °C. The product solution was cooled over 10 min to 24 °C and the cooled solution was filtered over a celite pad (6 × 8 cm). The celite pad was washed with ethyl acetate (4 × 50 mL) and dichloromethane (2 × 50 mL). The filtrates were combined and the combined filtrates were concentrated to dryness. The residue obtained was purified by flash-column chromatography (eluting with 25% acetone–hexanes initially, grading to 3% methanol–dichloromethane, one step) to afford the cyclized product **17** as a dark purple solid (1.17 g, 95%, 1:1 mixture of diastereomers).

$R_f$  = 0.70 (2% methanol–dichloromethane; UV, CAM).  $^1\text{H}$  NMR (500 MHz,  $\text{CDCl}_3$ ; 1:1 mixture of diastereomers, \* denotes second diastereomer),  $\delta$  7.47–7.40 (m, 4H,  $\text{H}_1/\text{H}_2/\text{H}_{11}^*/\text{H}_{12}^*$ ), 7.07 (s, 1H,  $\text{H}_7^*$ ), 7.05 (s, 1H,  $\text{H}_7$ ), 6.82 (s, 2H,  $\text{H}_{11}$ ), 6.77 (s, 2H,  $\text{H}_{11}^*$ ), 6.38 (s, 1H,  $\text{H}_9$ ), 6.35 (s, 1H,  $\text{H}_{9^*}$ ), 5.32 (app d, 4H,  $J$  = 1.5 Hz,  $\text{H}_3/\text{H}_4/\text{H}_3^*/\text{H}_4^*$ ), 5.27 (bs, 4H,  $\text{H}_3/\text{H}_4/\text{H}_3^*/\text{H}_4^*$ ), 5.04 (s, 1H,  $\text{H}_8$ ), 5.01 (s, 1H,  $\text{H}_{8^*}$ ), 3.59 (s, 6H,  $\text{H}_5/\text{H}_6/\text{H}_5^*/\text{H}_6^*$ ), 3.56 (s, 6H,  $\text{H}_5/\text{H}_6/\text{H}_5^*/\text{H}_6^*$ ), 3.34 (d, 1H,  $J$  = 19.0 Hz,  $\text{H}_{15}^*$ ), 3.25 (d, 1H,  $J$  = 18.5 Hz,  $\text{H}_{15}$ ), 3.04–2.99 (m, 2H,  $\text{H}_{15}/\text{H}_{15}^*$ ), 2.44 (s, 6H,  $\text{H}_{10}$ ), 2.31 (s, 6H,  $\text{H}_{10}^*$ ), 2.25 (s, 3H,  $\text{H}_{12}$ ), 2.21 (s, 3H,  $\text{H}_{12}^*$ ), 2.09–2.01 (m, 2H,  $\text{H}_{13}/\text{H}_{13}^*$ ), 2.00–1.92 (m, 1H,  $\text{H}_{13}$ ), 1.92–1.84 (m, 1H,  $\text{H}_{13}^*$ ), 1.02 (t, 3H,  $J$  = 7.5 Hz,  $\text{H}_{14}^*$ ), 0.98 (t, 3H,  $J$  = 7.5 Hz,  $\text{H}_{14}$ ).  $^{13}\text{C}$  NMR (125 MHz,  $\text{CDCl}_3$ ; 1:1 mixture of diastereomers, \* denotes second diastereomer),  $\delta$  190.6 (C), 190.1 (C\*), 180.7 (1 × C, 1 × C\*), 175.5 (C), 175.4 (C\*), 154.5 (2 × C), 154.3 (2 × C\*), 144.2 (C), 144.0 (C\*), 139.0 (C), 138.9 (C\*), 137.9 (2 × C), 137.8 (2 × C\*), 130.2 (2 × CH, 2 × CH\*), 128.1 (2 × C), 127.4 (2 × CH), 127.0 (2 × C\*), 125.1 (2 × CH\*), 124.4 (C), 124.3 (C\*), 122.8 (C), 122.5 (1 × CH, 1 × CH\*, 1 × C\*), 122.3 (C), 122.2 (C\*), 121.6 (C), 121.3 (C\*), 101.1 (CH), 100.5 (CH\*), 96.4 (2 ×  $\text{CH}_2$ ), 96.3 ( $\text{CH}_2^*$ ), 96.2 ( $\text{CH}_2^*$ ), 85.2 (C), 83.2 (C\*), 75.5 (CH), 74.8 (CH\*), 56.7 (2 ×  $\text{CH}_3$ ), 56.7 ( $\text{CH}_3^*$ ), 56.6 ( $\text{CH}_3^*$ ), 43.3 ( $\text{CH}_2$ ), 40.2 ( $\text{CH}_2^*$ ), 32.3 ( $\text{CH}_2$ ), 31.8 ( $\text{CH}_2^*$ ), 20.9 (1 ×  $\text{CH}_3$ , 1 ×  $\text{CH}_3^*$ ), 20.4 (2 ×  $\text{CH}_3$ ), 20.3 (2 ×  $\text{CH}_3^*$ ), 8.6 ( $\text{CH}_3$ ), 7.8 ( $\text{CH}_3^*$ ). IR (ATR-FTIR),  $\text{cm}^{-1}$ : 2966 (b), 1595 (s), 1562 (s), 1462 (m). HRMS-CI( $m/z$ ):  $[\text{M} + \text{H}]^+$  calcd for  $\text{C}_{33}\text{H}_{35}\text{O}_9$ , 575.2281; found, 575.2295.



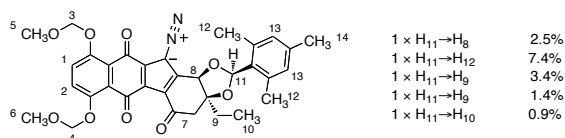

**19**

**Endo-Mesityl Diazofluorene 19:**

$R_f = 0.64$  (90% ethyl acetate–hexanes; UV).  $t_R = 1.97$ .  $^1\text{H NMR}$  (500 MHz,  $\text{CDCl}_3$ ):  $\delta$  7.49 (d, 1H,  $J = 9.5$  Hz, H<sub>1</sub>/H<sub>2</sub>), 7.44 (d, 1H,  $J = 9.5$  Hz, H<sub>1</sub>/H<sub>2</sub>), 6.77 (s, 2H, H<sub>13</sub>), 6.37 (s, 1H, H<sub>11</sub>), 5.32–5.26 (m, 4H, H<sub>3</sub>/H<sub>4</sub>), 5.09 (s, 1H, H<sub>8</sub>), 3.57 (s, 3H, H<sub>5</sub>/H<sub>6</sub>), 3.55 (s, 3H, H<sub>5</sub>/H<sub>6</sub>), 3.22 (d, 1H,  $J = 16.0$  Hz, H<sub>7</sub>), 2.89 (d, 1H,  $J = 16.0$  Hz, H<sub>7</sub>), 2.24 (s, 6H, H<sub>12</sub>), 2.21 (s, 3H, H<sub>14</sub>), 2.15–2.11 (m, 1H, H<sub>9</sub>), 1.88–1.84 (m, 1H, H<sub>9</sub>), 1.07 (t, 3H,  $J = 7.5$  Hz, H<sub>10</sub>).  $^{13}\text{C NMR}$  (125 MHz,  $\text{CDCl}_3$ ):  $\delta$  188.0 (C), 179.2 (C), 178.0 (C), 153.1 (C), 153.0 (C), 144.8 (C), 139.3 (C), 138.0 (2 × C), 133.8 (C), 130.2 (2 × CH), 129.3 (C), 127.3 (CH), 126.5 (C), 125.8 (C), 124.9 (C), 123.4 (CH), 122.0 (C), 100.8 (CH), 96.8 (CH<sub>2</sub>), 95.7 (CH<sub>2</sub>), 84.3 (C), 76.1 (C), 72.8 (CH), 56.6 (CH<sub>3</sub>), 56.6 (CH<sub>3</sub>), 47.2 (CH<sub>2</sub>), 30.6 (CH<sub>2</sub>), 20.8 (CH<sub>3</sub>), 20.2 (2 × CH<sub>3</sub>), 7.5 (CH<sub>3</sub>). IR (ATR-FTIR),  $\text{cm}^{-1}$ : 2926 (m), 2137 (s), 1686 (s), 1443 (s). HRMS-Cl ( $m/z$ ):  $[\text{M} + \text{H}]^+$  calcd for  $\text{C}_{33}\text{H}_{33}\text{N}_2\text{O}_9$ , 601.2181; found, 601.2186.

Either diazofluorene **18** or **19** could be fully deprotected to afford the monomeric lomaiviticin aglycon **31**. A representative procedure follows.

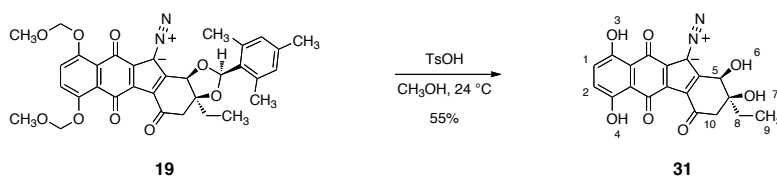

*Deprotection of the Endo-Mesityl Diazofluorene 19:*

A solution of *para*-toluenesulfonic acid in methanol (10.0 mM, 833  $\mu$ L, 8.33  $\mu$ mol, 0.25 equiv) was added to a stirred solution of the *endo*-mesityl diazofluorene **19** (20.0 mg, 33.3  $\mu$ mol, 1 equiv) in methanol (3.4 mL) at 24  $^{\circ}$ C. The resulting mixture was stirred for 3 h 20 min at 24  $^{\circ}$ C. The product mixture was diluted sequentially with distilled water (2.0 mL) and *N,N*-dimethylformamide (1.0 mL). The diluted reaction mixture was loaded directly onto a column of reverse phase silica gel. The mixture was eluted with acetonitrile–water (10% acetonitrile–water initially, grading to 30% acetonitrile–water, one step) to afford the lomaiviticin monomer aglycon **31** as a purple solid (7.0 mg, 55%).  $^1$ H NMR data (THF- $d_8$ ) were in agreement with those previously reported.<sup>12</sup> The purified monomer aglycon **31** was found to be stable for at least 3 d at 24  $^{\circ}$ C in  $d_7$ -DMF.

$R_f$  = 0.37 (5% methanol–dichloromethane; UV, CAM).  $t_R$  = 0.86.  $^1$ H NMR (500 MHz,  $d_7$ -DMF):  $\delta$  13.41 (s, 1H, H<sub>3</sub>/H<sub>4</sub>), 12.54 (s, 1H, H<sub>3</sub>/H<sub>4</sub>), 7.37 (d, 1H,  $J$  = 9.5 Hz, H<sub>1</sub>/H<sub>2</sub>), 7.33 (d, 1H,  $J$  = 9.5 Hz, H<sub>1</sub>/H<sub>2</sub>), 6.27 (d, 1H,  $J$  = 8.5 Hz, H<sub>6</sub>), 5.26 (d, 1H,  $J$  = 8.5 Hz, H<sub>5</sub>), 4.78 (s, 1H, H<sub>7</sub>), 2.82 (d, 1H,  $J$  = 17.0 Hz, H<sub>10</sub>), 2.59 (d, 1H,  $J$  = 15.5 Hz, H<sub>10</sub>), 1.83–1.79 (m, 2H, H<sub>8</sub>), 1.00 (t, 3H,  $J$  = 7.5 Hz, H<sub>9</sub>).  $^{13}$ C NMR (125 MHz, DMF- $d_7$ ):  $\delta$  189.7 (C), 183.8 (C), 183.5 (C), 159.1 (C), 158.5 (C), 155.3 (C), 131.9 (C), 131.0 (C), 129.2 (CH), 128.9 (CH), 125.7 (C), 114.4 (C), 113.6 (C), 81.2 (C), 79.1 (C), 72.1 (CH), 50.2 (CH<sub>2</sub>), 31.6 (CH<sub>2</sub>), 8.8 (CH<sub>3</sub>). IR (ATR-FTIR),  $\text{cm}^{-1}$ : 3647 (m), 2956 (s), 2173 (m), 1441 (s).  $[\alpha]_D^{20}$   $-20$  ( $c$  0.01, THF). HRMS- $\text{CI}$  ( $m/z$ ):  $[\text{M} + \text{H}]^+$  calcd for C<sub>19</sub>H<sub>15</sub>N<sub>2</sub>O<sub>7</sub>, 383.0879; found, 383.0875.

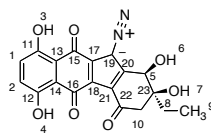

31

Table of NMR Data and C–H couplings ( $d_7$ -DMF):

| Position | $\delta$ H | Multiplicity,<br>Integration, $J$ -Value | $\delta$ C | HMBC ( $H-C$ )                     |
|----------|------------|------------------------------------------|------------|------------------------------------|
| 1        | 7.37       | d, 1H, $J = 9.5$ Hz                      | 129.2      | $C_{11}, C_{13}$                   |
| 2        | 7.33       | d, 1H, $J = 9.5$ Hz                      | 128.9      | $C_{12}, C_{13}$                   |
| 3        | 13.41      | s, 1H                                    | –          | $C_1, C_{13}, C_{11}$              |
| 4        | 12.54      | s, 1H                                    | –          | $C_2, C_{12}, C_{14}$              |
| 5        | 5.26       | d, 1H, $J = 8.5$ Hz                      | 72.1       | $C_8, C_{19}, C_{20}, C_{21}$      |
| 6        | 6.27       | d, 1H, $J = 8.5$ Hz                      | –          | –                                  |
| 7        | 4.78       | s, 1H                                    | –          | –                                  |
| 8        | 1.83–1.79  | m, 2H                                    | 31.6       | $C_5, C_9, C_{10}, C_{23}$         |
| 9        | 1.00       | t, 3H, $J = 7.5$ Hz                      | 8.8        | $C_8, C_{23}$                      |
| 10       | 2.82       | d, 1H, $J = 17.0$ Hz                     | 50.2       | $C_5, C_8, C_{21}, C_{22}, C_{23}$ |
|          | 2.59       | d, 2H, $J = 15.5$ Hz                     | 50.2       | $C_5, C_8, C_{21}, C_{22}, C_{23}$ |
| 11       | –          | –                                        | 158.5      |                                    |
| 12       | –          | –                                        | 159.1      |                                    |
| 13       | –          | –                                        | 114.4      |                                    |
| 14       | –          | –                                        | 113.6      |                                    |
| 15       | –          | –                                        | 183.8      |                                    |
| 16       | –          | –                                        | 183.5      |                                    |
| 17       | –          | –                                        | 131.9      |                                    |
| 18       | –          | –                                        | 131.0      |                                    |
| 19       | –          | –                                        | 81.2       |                                    |
| 20       | –          | –                                        | 155.3      |                                    |
| 21       | –          | –                                        | 125.7      |                                    |
| 22       | –          | –                                        | 189.7      |                                    |
| 23       | –          | –                                        | 79.1       |                                    |

\*  $C_1, C_3, C_{11}, C_{13}, C_{15}$ , and  $C_{17}$  are interchangeable with  $C_2, C_4, C_{12}, C_{14}, C_{16}$ , and  $C_{18}$ , respectively.



### Oxidative Dimerization of the *Exo*-Mesityl Diazofluorene **18**:

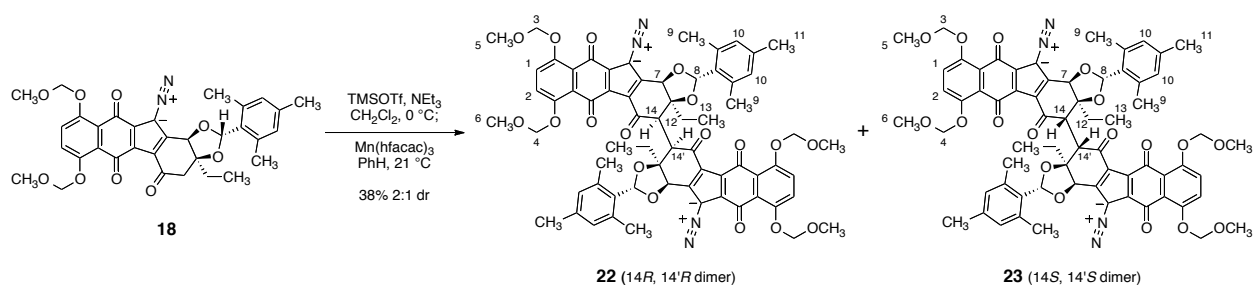

### Dimerization of Diazofluorene **18**:

Triethylamine (115  $\mu\text{L}$ , 831  $\mu\text{mol}$ , 5.00 equiv) and trimethylsilyl trifluoromethanesulfonate (75.3  $\mu\text{L}$ , 417  $\mu\text{mol}$ , 2.50 equiv) were added in sequence to a stirred solution of the *exo*-mesityl diazofluorene **18** [100 mg, 167  $\mu\text{mol}$ , 1 equiv; dried by azeotropic distillation with benzene ( $2 \times 5.0$  mL)] in dichloromethane (8.4 mL) at 0  $^{\circ}\text{C}$ . The resulting mixture was stirred for 20 min at 0  $^{\circ}\text{C}$ . The red product mixture was diluted with methanol (600  $\mu\text{L}$ ) and the diluted solution was transferred to a separatory funnel that had been charged with 0.1 M aqueous sodium phosphate buffer solution (pH 7, 50 mL) and dichloromethane (100 mL). The layers that formed were separated and the aqueous layer was extracted with dichloromethane ( $2 \times 15$  mL). The organic layers were combined and the combined organic layers were dried over sodium sulfate. The dried solution was filtered and the filtrate was concentrated to afford the trimethylsilyl enoxysilane of **18** (**20**) as a red oil.

A solution of manganese tris(hexafluoroacetylacetonate) in benzene (80.0 mM, 2.50 mL, 200  $\mu\text{mol}$ , 1.20 equiv) was added rapidly via syringe to a vigorously stirred solution of the enoxysilane **20** [167  $\mu\text{mol}$ , 1 equiv; dried by azeotropic distillation with benzene ( $2 \times 2$  mL)] in benzene (3.0 mL) at 24  $^{\circ}\text{C}$ . The reaction mixture was stirred for 2.5 min at 24  $^{\circ}\text{C}$  and then was diluted with methanol (2.0 mL). The diluted solution was transferred to a separatory funnel that had been charged with 50% ethyl acetate–hexanes (200 mL) and 1 N aqueous sodium hydroxide solution (30 mL). The separatory funnel was sealed and the sealed funnel was vigorously shaken. The layers that formed were separated and the organic layer was washed sequentially with 1 N aqueous sodium hydroxide solution ( $3 \times 30$  mL), saturated aqueous sodium bicarbonate solution (50 mL), distilled water (50 mL) and saturated aqueous sodium chloride solution (50 mL). The organic layer was dried over sodium sulfate and the dried solution was filtered. The filtrate was concentrated and the residue obtained was purified by flash-column chromatography (eluting with 30% acetone–hexanes) to afford separately the (14*R*,14'*R*)-dimeric diazofluorene **22** (orange solid, 26.4 mg, 26%), the (14*S*,14'*S*)-dimeric diazofluorene **23** (orange solid, 12.0 mg, 12%) and recovered diazofluorene **18** (yellow solid, 30.1 mg, 30%).

### (14*R*,14'*R*)-Dimeric Diazofluorene **22**:

*Note:*  $^1\text{H}$  and  $^{13}\text{C}$  NMR data are normalized to the monomeric structure.

$R_f$  = 0.41 (40% acetone–hexanes; UV, ANIS).  $t_R$  = 2.77.  $^1\text{H}$  NMR [500 MHz, 10%  $\text{CDCl}_3$ – $\text{CD}_3\text{OD}$  (v/v)]:  $\delta$  7.37 (s, 1H,  $\text{H}_8$ ), 7.26 (app s, 2H,  $\text{H}_1/\text{H}_2$ ), 6.86 (s, 2H,  $\text{H}_{10}$ ), 5.41 (s, 1H,  $\text{H}_7$ ), 5.25 (d, 2H,  $J = 7.0$  Hz,  $\text{H}_3/\text{H}_4$ ), 5.18 (d, 1H,  $J = 7.0$  Hz,  $\text{H}_3/\text{H}_4$ ), 5.14 (d, 1H,  $J = 7.0$  Hz,  $\text{H}_3/\text{H}_4$ ), 5.00 (d, 1H,  $J = 7.0$  Hz,  $\text{H}_3/\text{H}_4$ ), 3.85 (s, 1H,  $\text{H}_{14}$ ), 3.52 (s, 3H,  $\text{H}_5/\text{H}_6$ ), 3.42 (s, 3H,  $\text{H}_5/\text{H}_6$ ), 2.62 (s, 6H,  $\text{H}_9$ ), 2.27 (s, 3H,  $\text{H}_{11}$ ), 2.08–1.98 (m, 2H,  $\text{H}_{12}$ ), 1.05 (t, 3H,  $J = 7.5$  Hz,  $\text{H}_{13}$ ).  $^{13}\text{C}$  NMR [125 MHz,  $\text{CDCl}_3$ – $\text{CD}_3\text{OD}$  (10% v/v)]: 192.2 (C), 180.4 (C), 179.0 (C), 154.2 (C), 153.8 (C), 147.3 (C), 140.3 (C), 140.0 (C), 135.9 (C), 131.2 ( $2 \times \text{CH}$ ), 129.7 (C), 129.6 (C), 126.8 (CH), 126.3 (C), 125.5 (C), 125.1 (CH), 123.0 (C), 105.0 (CH), 97.1 ( $\text{CH}_2$ ), 97.0 ( $\text{CH}_2$ ), 86.7 (C), 78.9 (C), 75.6 (CH), 57.2 ( $\text{CH}_3$ ), 56.9 ( $\text{CH}_3$ ), 55.1 (CH), 37.3 ( $\text{CH}_2$ ), 21.2 (3

× CH<sub>3</sub>), 9.2 (CH<sub>3</sub>). IR (ATR-FTIR), cm<sup>-1</sup>: 2957 (m), 2161 (s), 2029 (s), 1686 (s), 1443 (s). HRMS-CI (*m/z*): [M + H]<sup>+</sup> calcd for C<sub>66</sub>H<sub>63</sub>N<sub>4</sub>O<sub>18</sub>, 1199.4137; found, 1199.4136.

(14*S*,14'*S*)-Dimeric Diazofluorene **23**:

*Note: <sup>1</sup>H and <sup>13</sup>C NMR data are normalized to the monomeric structure.*

R<sub>f</sub> = 0.58 (40% acetone–hexanes; UV, ANIS). t<sub>R</sub> = 3.03. <sup>1</sup>H NMR (500 MHz, CDCl<sub>3</sub>): δ 7.54 (d, 1H, J = 9.5 Hz, H<sub>1</sub>/H<sub>2</sub>), 7.34 (d, 1H, J = 9.5 Hz, H<sub>1</sub>/H<sub>2</sub>), 6.75 (s, 2H, H<sub>10</sub>), 5.67 (s, 1H, H<sub>8</sub>), 5.57 (s, 1H, H<sub>7</sub>), 5.38 (d, 1H, J = 7.5 Hz, H<sub>3</sub>/H<sub>4</sub>), 5.27 (d, 1H, J = 7.0 Hz, H<sub>3</sub>/H<sub>4</sub>), 5.08 (d, 1H, J = 7.0 Hz, H<sub>3</sub>/H<sub>4</sub>), 5.04 (d, 1H, J = 6.5 Hz, H<sub>3</sub>/H<sub>4</sub>), 3.62 (s, 1H, H<sub>14</sub>), 3.60 (s, 3H, H<sub>5</sub>/H<sub>6</sub>), 3.48 (s, 3H, H<sub>5</sub>/H<sub>6</sub>), 2.82–2.77 (m, 1H, H<sub>12</sub>), 2.28 (s, 6H, H<sub>9</sub>), 2.25–2.19 (m, 4H, H<sub>11</sub>/H<sub>12</sub>), 1.07 (t, 3H, J = 7.0 Hz, H<sub>13</sub>). <sup>13</sup>C NMR (125 MHz, CDCl<sub>3</sub>): 191.0 (C), 178.0 (C), 177.9 (C), 153.7 (C), 152.7 (C), 142.0 (C), 138.5 (C), 137.5 (2 × C), 133.8 (C), 130.1 (2 × CH), 129.0 (C), 127.6 (C), 126.5 (C), 126.3 (CH), 124.5 (CH), 124.4 (C), 121.7 (C), 101.2 (CH), 96.1 (2 × CH<sub>2</sub>), 86.7 (C), 76.8 (C, determined indirectly by HMBC), 73.0 (CH), 56.5 (CH<sub>3</sub>), 56.4 (CH<sub>3</sub>), 55.7 (CH), 28.8 (CH<sub>2</sub>), 20.8 (3 × CH<sub>3</sub>), 7.2 (CH<sub>3</sub>). IR (ATR-FTIR), cm<sup>-1</sup>: 2966 (m), 2160 (s), 2030 (m), 1688 (s). HRMS-CI (*m/z*): [M + H]<sup>+</sup> calcd for C<sub>66</sub>H<sub>63</sub>N<sub>4</sub>O<sub>18</sub>, 1199.4137; found, 1199.4120.

**(14*R*,14'*R*)-Dimeric Diazofluorene 22:**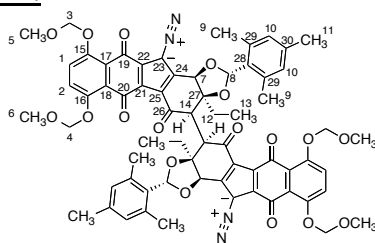**22** (14*R*, 14'*R* dimer)Table of NMR Data and C–H couplings (10% CD<sub>3</sub>OD–CDCl<sub>3</sub>):

| Position | $\delta$ H | Multiplicity,<br>Integration, <i>J</i> -Value | $\delta$ C | HMBC ( <sub>H-C</sub> )                                                                                                    |
|----------|------------|-----------------------------------------------|------------|----------------------------------------------------------------------------------------------------------------------------|
| 1        | 7.26       | app s, 1H                                     | 126.8      | C <sub>15</sub> , C <sub>17</sub> , C <sub>19</sub>                                                                        |
| 2        | 7.26       | app s, 1H                                     | 125.1      | C <sub>16</sub> , C <sub>18</sub> , C <sub>20</sub>                                                                        |
| 3        | 5.25       | d, 1H, <i>J</i> = 7.0 Hz                      | 97.1       | C <sub>5</sub> , C <sub>15</sub>                                                                                           |
|          | 5.18       | d, 1H, <i>J</i> = 7.0 Hz                      | 97.1       | C <sub>5</sub> , C <sub>15</sub>                                                                                           |
| 4        | 5.14       | d, 1H, <i>J</i> = 7.0 Hz                      | 97.0       | C <sub>6</sub> , C <sub>16</sub>                                                                                           |
|          | 5.00       | d, 1H, <i>J</i> = 7.0 Hz                      | 97.0       | C <sub>6</sub> , C <sub>16</sub>                                                                                           |
| 5        | 3.52       | s, 3H                                         | 57.2       | C <sub>3</sub>                                                                                                             |
| 6        | 3.42       | s, 3H                                         | 56.9       | C <sub>4</sub>                                                                                                             |
| 7        | 5.41       | s, 1H                                         | 75.6       | C <sub>8</sub> , C <sub>12</sub> , C <sub>14</sub> , C <sub>23</sub> , C <sub>24</sub> , C <sub>25</sub> , C <sub>27</sub> |
| 8        | 7.37       | s, 1H                                         | 105.0      | C <sub>28</sub> , C <sub>29</sub>                                                                                          |
| 9        | 2.62       | s, 3H                                         | 21.2       | C <sub>10</sub> , C <sub>28</sub> , C <sub>29</sub>                                                                        |
| 10       | 6.86       | s, 1H                                         | 131.2      | C <sub>9</sub> /C <sub>11</sub> , C <sub>10</sub> , C <sub>28</sub> , C <sub>29</sub>                                      |
| 11       | 2.27       | s, 3H                                         | 21.2       | C <sub>10</sub> , C <sub>30</sub>                                                                                          |
| 12       | 2.08–1.98  | m, 2H                                         | 37.3       | C <sub>7</sub> , C <sub>13</sub> , C <sub>14</sub> , C <sub>27</sub>                                                       |
| 13       | 1.05       | t, 3H, <i>J</i> = 7.5 Hz                      | 9.2        | C <sub>12</sub> , C <sub>27</sub>                                                                                          |
| 14       | 3.85       | s, 1H                                         | 55.2       | C <sub>7</sub> , C <sub>12</sub> , C <sub>14</sub> , C <sub>25</sub> , C <sub>26</sub> , C <sub>27</sub>                   |
| 15       | –          | –                                             | 153.9      |                                                                                                                            |
| 16       | –          | –                                             | 154.2      |                                                                                                                            |
| 17       | –          | –                                             | 125.5      |                                                                                                                            |
| 18       | –          | –                                             | 123.0      |                                                                                                                            |
| 19       | –          | –                                             | 179.0      |                                                                                                                            |
| 20       | –          | –                                             | 180.4      |                                                                                                                            |
| 21       | –          | –                                             | 129.7      |                                                                                                                            |
| 22       | –          | –                                             | 135.9      |                                                                                                                            |
| 23       | –          | –                                             | 78.6       |                                                                                                                            |
| 24       | –          | –                                             | 147.3      |                                                                                                                            |
| 25       | –          | –                                             | 126.3      |                                                                                                                            |
| 26       | –          | –                                             | 192.2      |                                                                                                                            |
| 27       | –          | –                                             | 86.7       |                                                                                                                            |
| 28       | –          | –                                             | 129.6      |                                                                                                                            |
| 29       | –          | –                                             | 140.0      |                                                                                                                            |
| 30       | –          | –                                             | 140.3      |                                                                                                                            |

\* C<sub>1</sub>, C<sub>3</sub>, C<sub>5</sub>, C<sub>15</sub>, C<sub>17</sub>, C<sub>19</sub>, and C<sub>22</sub> are interchangeable with C<sub>2</sub>, C<sub>4</sub>, C<sub>6</sub>, C<sub>16</sub>, C<sub>18</sub>, C<sub>20</sub>, and C<sub>21</sub>, respectively.

**(14*S*,14'*S*)-Dimeric Diazofluorene 23:**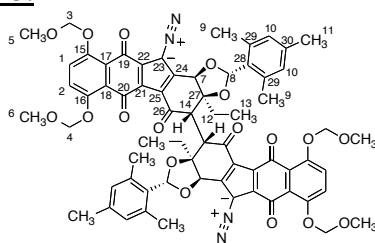**23** (14*S*, 14'*S* dimer)Table of NMR Data and C–H couplings (CDCl<sub>3</sub>):

| Position | $\delta$ H | Mult, J-Value     | $\delta$ C | HMBC ( <sub>H-C</sub> )                                                                                |
|----------|------------|-------------------|------------|--------------------------------------------------------------------------------------------------------|
| 1        | 7.54       | d, 1H, J = 9.5 Hz | 126.3      | C <sub>15</sub> , C <sub>17</sub> , C <sub>19</sub>                                                    |
| 2        | 7.34       | d, 1H, J = 9.5 Hz | 124.4      | C <sub>16</sub> , C <sub>18</sub> , C <sub>20</sub>                                                    |
| 3        | 5.38       | d, 1H, J = 7.5 Hz | 96.1       | C <sub>5</sub> , C <sub>15</sub>                                                                       |
| 3*       | 5.27       | d, 1H, J = 7.0 Hz | 96.1       | C <sub>5</sub> , C <sub>15</sub>                                                                       |
| 4        | 5.08       | d, 1H, J = 7.0 Hz | 96.1       | C <sub>6</sub> , C <sub>16</sub>                                                                       |
| 4*       | 5.04       | d, 1H, J = 6.5 Hz | 96.1       | C <sub>6</sub> , C <sub>16</sub>                                                                       |
| 5        | 3.60       | s, 3H             | 56.5       | C <sub>3</sub>                                                                                         |
| 6        | 3.48       | s, 3H             | 56.4       | C <sub>4</sub>                                                                                         |
| 7        | 5.57       | s, 1H             | 73.0       | C <sub>8</sub> , C <sub>12</sub> , C <sub>23</sub> , C <sub>24</sub> , C <sub>25</sub>                 |
| 8        | 5.67       | s, 1H             | 101.2      | C <sub>28</sub> , C <sub>29</sub>                                                                      |
| 9        | 2.28       | s, 3H             | 20.8       | C <sub>10</sub> , C <sub>28</sub> , C <sub>29</sub>                                                    |
| 10       | 6.75       | s, 1H             | 130.1      | C <sub>8</sub> , C <sub>9</sub> /C <sub>11</sub> , C <sub>10</sub> , C <sub>28</sub> , C <sub>29</sub> |
| 11       | 2.20       | s, 3H             | 20.8       | C <sub>10</sub> , C <sub>30</sub>                                                                      |
| 12       | 2.82–2.77  | m, 2H             | 28.8       | C <sub>7</sub> , C <sub>13</sub> , C <sub>14</sub> , C <sub>27</sub>                                   |
| 13       | 1.07       | t, 3H, J = 7.0 Hz | 7.2        | C <sub>12</sub> , C <sub>27</sub>                                                                      |
| 14       | 3.62       | s, 1H             | 55.7       | C <sub>7</sub> , C <sub>14</sub> , C <sub>25</sub> , C <sub>26</sub> , C <sub>27</sub>                 |
| 15       | –          | –                 | 152.7      |                                                                                                        |
| 16       | –          | –                 | 153.7      |                                                                                                        |
| 17       | –          | –                 | 124.4      |                                                                                                        |
| 18       | –          | –                 | 121.7      |                                                                                                        |
| 19       | –          | –                 | 177.9      |                                                                                                        |
| 20       | –          | –                 | 178.0      |                                                                                                        |
| 21       | –          | –                 | 133.8      |                                                                                                        |
| 22       | –          | –                 | 126.5      |                                                                                                        |
| 23       | –          | –                 | 76.8       |                                                                                                        |
| 24       | –          | –                 | 142.0      |                                                                                                        |
| 25       | –          | –                 | 129.0      |                                                                                                        |
| 26       | –          | –                 | 191.0      |                                                                                                        |
| 27       | –          | –                 | 86.7       |                                                                                                        |
| 28       | –          | –                 | 127.6      |                                                                                                        |
| 29       | –          | –                 | 137.5      |                                                                                                        |
| 30       | –          | –                 | 138.5      |                                                                                                        |

\* C<sub>1</sub>, C<sub>3</sub>, C<sub>5</sub>, C<sub>15</sub>, C<sub>17</sub>, C<sub>19</sub>, C<sub>22</sub> are interchangeable with C<sub>2</sub>, C<sub>4</sub>, C<sub>6</sub>, C<sub>16</sub>, C<sub>18</sub>, C<sub>20</sub>, C<sub>21</sub> respectively.

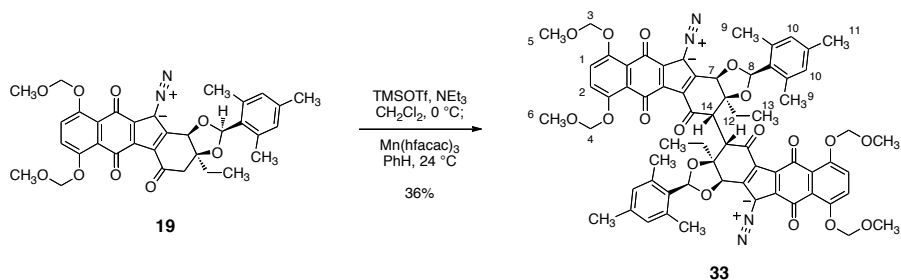

#### Dimerization of The Endo-Mesityl Diazofluorene **19**:

Triethylamine (69.0  $\mu\text{L}$ , 500  $\mu\text{mol}$ , 5.00 equiv) and trimethylsilyl trifluoromethanesulfonate (45.0  $\mu\text{L}$ , 250  $\mu\text{mol}$ , 2.50 equiv) were added in sequence to a stirred solution of the *endo*-mesityl diazofluorene **19** (60.0 mg, 100  $\mu\text{mol}$ , 1 equiv) in dichloromethane (5.0 mL) at 0  $^\circ\text{C}$ . The resulting mixture was stirred for 5 min at 0  $^\circ\text{C}$ . The product mixture was diluted sequentially with methanol (390  $\mu\text{L}$ ) and 0.1 M aqueous sodium phosphate buffer solution (pH 7, 5 mL). The diluted solution was transferred to a separatory funnel and the layers that formed were separated. The aqueous layer was extracted with dichloromethane (2  $\times$  5 mL). The organic layers were combined and the combined organic layers were dried over sodium sulfate. The dried solution was filtered and the filtrate was concentrated to afford the trimethylsilyl enoxysilane of **19** (**32**) as a red oil.

A solution of manganese tris(hexafluoroacetylacetonate) in benzene (80.0 mM, 1.50 mL, 120  $\mu\text{mol}$ , 1.20 equiv) was added rapidly via syringe to a vigorously stirred solution of the enoxysilane **32** [100  $\mu\text{mol}$ , 1 equiv; dried by azeotropic distillation with benzene (2  $\times$  500  $\mu\text{L}$ )] in benzene (1.8 mL) at 24  $^\circ\text{C}$ . The reaction mixture was stirred for 1.0 min at 24  $^\circ\text{C}$  and then was diluted with methanol (780  $\mu\text{L}$ ). The diluted solution was transferred to a separatory funnel that had been charged with 25% ethyl acetate–hexanes (150 mL) and 1 N aqueous sodium hydroxide solution (100 mL). The separatory funnel was sealed and the sealed funnel was vigorously shaken. The layers that formed were separated and the organic layer was washed sequentially with 1 N aqueous sodium hydroxide solution (2  $\times$  100 mL), saturated aqueous sodium bicarbonate solution (100 mL), distilled water (100 mL) and saturated aqueous sodium chloride solution (100 mL). The organic layer was dried over sodium sulfate and the dried solution was filtered. The filtrate was concentrated and the residue obtained was purified by flash-column chromatography (eluting with 30% acetone–hexanes) to afford the (14*S*,14'*S*)-dimeric diazofluorene **33** as an orange solid (21.6 mg, 36%).

Note:  $^1\text{H}$  and  $^{13}\text{C}$  NMR data are normalized to the monomeric structure.

$R_f$  = 0.28 (70% ethyl acetate–hexanes; UV).  $t_R$  = 2.90.  $^1\text{H}$  NMR (500 MHz,  $\text{CDCl}_3$ ):  $\delta$  7.42 (d, 1H,  $J$  = 9.0 Hz,  $\text{H}_1/\text{H}_2$ ), 7.22 (d, 1H,  $J$  = 9.0 Hz,  $\text{H}_1/\text{H}_2$ ), 6.60 (s, 2H,  $\text{H}_{10}$ ), 6.30 (s, 1H,  $\text{H}_8$ ), 5.27 (d, 1H,  $J$  = 7.0 Hz,  $\text{H}_3/\text{H}_4$ ), 5.24 (s, 1H,  $\text{H}_7$ ), 5.15 (d, 1H,  $J$  = 7.0 Hz,  $\text{H}_3/\text{H}_4$ ), 4.97–4.93 (m, 2H,  $\text{H}_3/\text{H}_4$ ), 3.71 (s, 1H,  $\text{H}_{14}$ ), 3.51 (s, 3H,  $\text{H}_5/\text{H}_6$ ), 3.39 (s, 3H,  $\text{H}_5/\text{H}_6$ ), 2.97–2.92 (m, 1H,  $\text{H}_{12}$ ), 2.39–2.35 (m, 1H,  $\text{H}_{12}$ ), 2.08 (s, 3H,  $\text{H}_{11}$ ), 1.99 (s, 6H,  $\text{H}_9$ ), 1.13 (t, 3H,  $J$  = 7.5 Hz,  $\text{H}_{13}$ ).  $^{13}\text{C}$  NMR (125 MHz,  $\text{CDCl}_3$ ): 190.4 (C), 178.4 (C), 177.9 (C), 154.1 (C), 153.0 (C), 146.4 (C), 139.3 (C), 138.3 (2  $\times$  C), 133.7 (C), 130.6 (2  $\times$  C), 127.5 (C), 127.1 (C), 126.8 (C), 125.7 (C), 125.0 (C), 124.8 (C), 122.2 (C), 100.4 (C), 96.7 (C), 96.6 (C), 88.8 (C), 78.2 (C), 71.5 (C), 56.9 (C), 56.8 (C), 54.5 (C), 23.3 (C), 21.2 (C), 20.7 (2  $\times$  C), 6.8 (C). IR (ATR-FTIR),  $\text{cm}^{-1}$ : 2967 (s), 2141 (m), 1686 (m), 1443 (m). HRMS-Cl ( $m/z$ ):  $[\text{M} + \text{H}]^+$  calcd for  $\text{C}_{66}\text{H}_{63}\text{N}_4\text{O}_{18}$ , 1199.4137; found, 1199.4136.

**(14*S*,14'*S*)-Dimeric Diazofluorene 33:**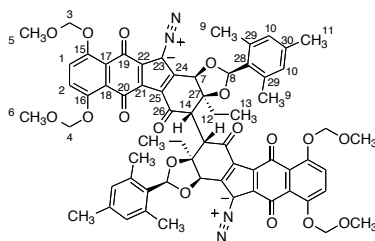**33** (14*S*, 14'*S* dimer)Table of NMR Data and C–H couplings (CDCl<sub>3</sub>):

| Position | $\delta$ H              | Mult, J-Value     | $\delta$ C | HMBC (H-C)                                                                             |
|----------|-------------------------|-------------------|------------|----------------------------------------------------------------------------------------|
| 1        | 7.42                    | d, 1H, J = 9.0 Hz | 126.8      | C <sub>15</sub> , C <sub>17</sub>                                                      |
| 2        | 7.22                    | d, 1H, J = 9.0 Hz | 124.8      | C <sub>16</sub> , C <sub>18</sub> , C <sub>20</sub>                                    |
| 3        | 4.97–4.93               | m, 2H             | 96.6       | C <sub>5</sub> , C <sub>15</sub>                                                       |
| 4        | 5.27                    | d, 1H, J = 7.0 Hz | 96.7       | C <sub>6</sub> , C <sub>16</sub>                                                       |
| 4*       | 5.15                    | d, 1H, J = 7.0 Hz | 96.7       | C <sub>6</sub> , C <sub>16</sub>                                                       |
| 5        | 3.51                    | s, 3H             | 56.9       | C <sub>3</sub>                                                                         |
| 6        | 3.39                    | s, 3H             | 56.8       | C <sub>4</sub>                                                                         |
| 7        | 5.24                    | s, 1H             | 71.5       | C <sub>8</sub> , C <sub>12</sub> , C <sub>23</sub> , C <sub>24</sub> , C <sub>25</sub> |
| 8        | 6.30                    | s, 1H             | 100.4      | C <sub>28</sub> , C <sub>29</sub>                                                      |
| 9        | 1.99                    | s, 3H             | 20.7       | C <sub>10</sub> /C <sub>12</sub> , C <sub>30</sub> , C <sub>31</sub> /C <sub>33</sub>  |
| 10       | 6.60                    | s, 1H             | 130.6      | C <sub>9</sub> /C <sub>13</sub> , C <sub>31</sub> /C <sub>33</sub>                     |
| 11       | 2.08                    | s, 3H             | 21.2       | C <sub>10</sub> /C <sub>12</sub> , C <sub>32</sub>                                     |
| 12       | 2.97–2.22,<br>2.39–2.35 | m, 2H             | 23.3       | C <sub>7</sub> , C <sub>15</sub> , C <sub>16</sub> , C <sub>29</sub>                   |
| 13       | 1.13                    | t, 3H, J = 7.5 Hz | 6.8        | C <sub>14</sub> , C <sub>29</sub>                                                      |
| 14       | 3.71                    | s, 1H             | 54.5       | C <sub>7</sub> , C <sub>16</sub> , C <sub>27</sub> , C <sub>28</sub> , C <sub>29</sub> |
| 15       | –                       | –                 | 153.9      |                                                                                        |
| 16       | –                       | –                 | 153.0      |                                                                                        |
| 17       | –                       | –                 | 125.7      |                                                                                        |
| 18       | –                       | –                 | 122.2      |                                                                                        |
| 19       | –                       | –                 | 177.9      |                                                                                        |
| 20       | –                       | –                 | 178.4      |                                                                                        |
| 21       | –                       | –                 | 138.3      |                                                                                        |
| 22       | –                       | –                 | 133.7      |                                                                                        |
| 23       | –                       | –                 | 78.2       |                                                                                        |
| 24       | –                       | –                 | 146.4      |                                                                                        |
| 25       | –                       | –                 | 125.7      |                                                                                        |
| 26       | –                       | –                 | 190.4      |                                                                                        |
| 27       | –                       | –                 | 88.6       |                                                                                        |
| 28       | –                       | –                 | 127.1      |                                                                                        |
| 29       | –                       | –                 | 127.5      |                                                                                        |
| 30       | –                       | –                 | 139.2      |                                                                                        |

\* C<sub>1</sub>, C<sub>3</sub>, C<sub>5</sub>, C<sub>15</sub>, C<sub>17</sub>, C<sub>19</sub>, and C<sub>22</sub> are interchangeable with C<sub>2</sub>, C<sub>4</sub>, C<sub>6</sub>, C<sub>16</sub>, C<sub>18</sub>, C<sub>20</sub>, and C<sub>21</sub>, respectively.

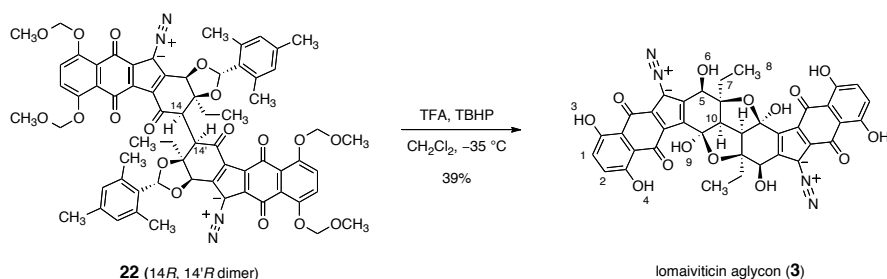

#### Deprotection of The (14*R*,14'*R*)-Dimeric Diazofluorene **22**:

A 100-mL round-bottomed flask was charged with a solution of the (14*R*, 14'*R*)-dimeric diazofluorene **22** (10.0 mg, 8.34  $\mu\text{mol}$ , 1 equiv) in 20% dichloromethane–benzene (v/v, 2.0 mL). The solution was concentrated to dryness at 24 °C. The residue obtained was dissolved in dichloromethane (1.2 mL) and solution of anhydrous *tert*-butylhydroperoxide in decane (5.5 M, 400  $\mu\text{L}$ , 2.20 mmol, 264 equiv) was added. The resulting orange, homogeneous mixture was cooled to –35 °C. Trifluoroacetic acid (400  $\mu\text{L}$ , 5.23 mmol, 627 equiv) was then added dropwise over 1 min via syringe to the cold mixture. The reaction mixture was stirred for 13 h at –35 °C. The purple product mixture was cooled to –78 °C (mixture freezes on cooling). Dichloromethane (33 mL) and 0.1 M aqueous sodium phosphate buffer solution (pH 7, 50 mL) were then added in sequence via syringe pump at a rate of 1 mL/min. Upon completion of the addition, the cooling bath was removed and the biphasic mixture was allowed to warm to 21 °C over 1.5 h. The resulting biphasic solution was transferred to a separatory funnel and the layers that formed were separated. The aqueous layer was extracted with dichloromethane (10 mL). The organic layers were combined and the combined organic layers were dried over sodium sulfate. The dried solution was filtered and the filtrate was concentrated. The residue obtained was purified by PTLC (pre-developed with 100% ethyl acetate, eluting with 100% ethyl acetate followed by 5% methanol–dichloromethane) to afford the lomaiviticin aglycon **3** as a purple solid (2.5 mg, 39%). **Note:** The ketone tautomer of lomaiviticin aglycon (**25**) was detected as the major species in solution (LC/MS analysis,  $t_{\text{R}}$  = 1.55), but was observed to cyclize upon purification by preparative TLC. A procedure to isolate mixtures containing **25** is described below.

$R_f$  = 0.15 (100% ethyl acetate; UV, ANIS).  $t_{\text{R}}$  = 1.26. IR (ATR-FTIR),  $\text{cm}^{-1}$ : 2922 (s), 2146 (s), 1591 (s), 1445 (s).  $[\alpha]_{\text{D}}^{20}$  = –177° ( $c$  0.022,  $\text{CHCl}_3$ ). HRMS-CI ( $m/z$ ):  $[\text{M} - \text{OH}]^+$  calcd for  $\text{C}_{38}\text{H}_{26}\text{N}_4\text{O}_{13}$ , 745.1418; found, 745.1418. The aglycon **3** is only sparingly soluble in methanol- $d_4$ . NMR spectral data in chloroform- $d$ , *N,N*-dimethylformamide- $d_7$ , and 30% *N,N*-dimethylformamide- $d_7$ –methanol- $d_4$  are provided below.

$^1\text{H}$  NMR (400 MHz,  $\text{CDCl}_3$ ):  $\delta$  12.77 (s, 1H,  $\text{H}_3/\text{H}_4$ ), 12.62 (s, 1H,  $\text{H}_3/\text{H}_4$ ), 7.19 (d, 1H,  $J$  = 9.2 Hz,  $\text{H}_1/\text{H}_2$ ), 7.15 (d, 1H,  $J$  = 9.2 Hz,  $\text{H}_1/\text{H}_2$ ), 5.59 (s, 1H,  $\text{H}_9$ ), 4.98 (d, 1H,  $J$  = 10.4 Hz,  $\text{H}_5$ ), 3.67 (s, 1H,  $\text{H}_{10}$ ), 2.83 (d, 1H,  $J$  = 11.2 Hz,  $\text{H}_6$ ), 2.42–2.36 (m, 1H,  $\text{H}_7$ ), 2.25–2.17 (m, 1H,  $\text{H}_7$ ), 1.20 (t, 3H,  $J$  = 7.6 Hz,  $\text{H}_8$ ).  $^{13}\text{C}$  NMR (125 MHz,  $\text{CDCl}_3$ ): 184.5 (C), 181.5 (C), 158.5 (C), 158.3 (C), 136.7 (C), 132.3 (C), 129.6 (CH), 129.3 (CH), 127.6 (C), 126.9 (C), 112.9 (C), 112.5 (C), 99.4 (C), 88.6 (C), 68.5 (CH), 61.9 (CH), 32.1 ( $\text{CH}_2$ ), 9.8 ( $\text{CH}_3$ ). \*The diazo carbon was not observed due to co-resonance with the residual chloroform peak; this carbon atom was observed at 78.9 in  $d_7$ -DMF (vide infra).

The following NOEs were observed on irradiation of H-10 ( $\text{CDCl}_3$ ):

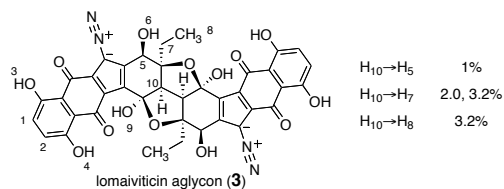

<sup>1</sup>H NMR (400 MHz, *d*<sub>7</sub>-DMF): δ 13.27 (s, 1H, H<sub>3</sub>/H<sub>4</sub>), 12.27 (s, 1H, H<sub>3</sub>/H<sub>4</sub>), 7.25 (d, 1H, J = 7.2 Hz, H<sub>1</sub>/H<sub>2</sub>), 7.18 (d, 1H, J = 7.6 Hz, H<sub>1</sub>/H<sub>2</sub>), 6.46 (s, 1H, H<sub>9</sub>), 4.94 (d, 1H, J = 7.6 Hz, H<sub>6</sub>), 4.69 (d, 1H, J = 7.6 Hz, H<sub>5</sub>), 3.30 (s, 1H, H<sub>10</sub>), 2.04–1.97 (m, 1H, H<sub>7</sub>), 1.93–1.89 (m, 1H, H<sub>7</sub>), 1.03 (t, 3H, J = 6.0 Hz, H<sub>8</sub>).  
<sup>13</sup>C NMR (125 MHz, *d*<sub>7</sub>-DMF): 184.3 (C), 181.9 (C), 159.1 (C), 158.6 (C), 142.0 (C), 131.4 (C), 130.9 (CH), 130.7 (CH), 129.6 (C), 127.9 (C), 114.2 (C), 113.4 (C), 102.7 (C), 90.1 (C), 78.9 (C), 70.3 (CH), 61.9 (CH), 31.4 (determined indirectly by HMBC, CH<sub>2</sub>), 10.1 (CH<sub>3</sub>).

<sup>1</sup>H NMR [500 MHz, 30% *d*<sub>7</sub>-DMF-CD<sub>3</sub>OD (v/v)]: δ 7.30 (d, 1H, J = 9.5 Hz, H<sub>1</sub>/H<sub>2</sub>), 7.27 (d, 1H, J = 9.5 Hz, H<sub>1</sub>/H<sub>2</sub>), 4.81 (s, 1H, H<sub>5</sub>), 3.41 (s, 1H, H<sub>10</sub>), 2.16–2.05 (m, 2H, H<sub>7</sub>), 1.20 (t, 3H, J = 7.5 Hz, H<sub>8</sub>).  
<sup>13</sup>C NMR [125 MHz, 30% *d*<sub>7</sub>-DMF-CD<sub>3</sub>OD (v/v)]: 184.8 (C), 182.4 (C), 159.1 (C), 158.7 (C), 141.8 (C), 132.2 (C), 130.6 (CH), 130.4 (C), 129.6 (CH), 128.1 (C), 114.6 (C), 113.7 (C), 102.9 (C), 90.6 (C), 70.4 (CH), 62.1 (CH), 31.5 (determined indirectly by HMQC, CH<sub>2</sub>), 10.0 (CH<sub>3</sub>).



### Lomaiviticin Aglycon (3):

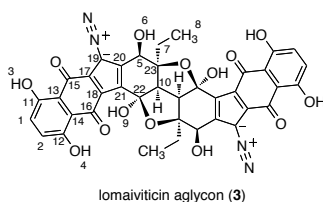

Table of NMR Data and C–H couplings (CDCl<sub>3</sub>):

| Position | $\delta$ H | Mult, J-Value      | $\delta$ C | HMBC (H-C)                                                          |
|----------|------------|--------------------|------------|---------------------------------------------------------------------|
| 1        | 7.19       | d, 1H, J = 9.2 Hz  | 129.6      | C <sub>11</sub> , C <sub>13</sub>                                   |
| 2        | 7.15       | d, 1H, J = 9.2 Hz  | 129.3      | C <sub>12</sub> , C <sub>14</sub>                                   |
| 3        | 12.77      | s, 1H              | –          | C <sub>1</sub> , C <sub>11</sub> , C <sub>13</sub>                  |
| 4        | 12.62      | s, 1H              | –          | C <sub>2</sub> , C <sub>12</sub> , C <sub>14</sub>                  |
| 5        | 4.98       | d, 1H, J = 11.2 Hz | 68.5       | –                                                                   |
| 6        | 2.83       | d, 1H, J = 10.4 Hz | –          | –                                                                   |
| 7        | 2.42–2.36  | m, 1H              | 32.1       | C <sub>5</sub> , C <sub>8</sub> , C <sub>10</sub> , C <sub>23</sub> |
| 7*       | 2.25–2.17  | m, 1H              | 32.1       | C <sub>5</sub> , C <sub>8</sub> , C <sub>10</sub> , C <sub>23</sub> |
| 8        | 1.20       | t, 3H, J = 7.6 Hz  | 9.8        | C <sub>7</sub> , C <sub>23</sub>                                    |
| 9        | 5.59       | s, 1H              | –          | C <sub>10</sub> , C <sub>22</sub>                                   |
| 10       | 3.67       | s, 1H              | 61.9       | C <sub>10</sub> , C <sub>22</sub>                                   |
| 11       | –          | –                  | 158.5      |                                                                     |
| 12       | –          | –                  | 158.3      |                                                                     |
| 13       | –          | –                  | 112.9      |                                                                     |
| 14       | –          | –                  | 112.5      |                                                                     |
| 15       | –          | –                  | 184.5      |                                                                     |
| 16       | –          | –                  | 181.5      |                                                                     |
| 17       | –          | –                  | 132.3      |                                                                     |
| 18       | –          | –                  | 127.6      |                                                                     |
| 19       | –          | –                  | –          |                                                                     |
| 20       | –          | –                  | 136.7      |                                                                     |
| 21       | –          | –                  | 126.9      |                                                                     |
| 22       | –          | –                  | 99.4       |                                                                     |
| 23       | –          | –                  | 88.6       |                                                                     |

### Lomaiviticin Aglycon (3):



Table of NMR Data and C–H couplings ( $d_7$ -DMF):

| Position | $\delta$ H | Mult, J-Value     | $\delta$ C | HMBC ( $_{H-C}$ )                                                    |
|----------|------------|-------------------|------------|----------------------------------------------------------------------|
| 1        | 7.25       | d, 1H, J = 7.2 Hz | 129.6      | C <sub>11</sub> , C <sub>13</sub>                                    |
| 2        | 7.18       | d, 1H, J = 7.6 Hz | 127.9      | C <sub>12</sub> , C <sub>14</sub>                                    |
| 3        | 13.27      | s, 1H             | –          | C <sub>1</sub> , C <sub>11</sub> , C <sub>13</sub>                   |
| 4        | 12.27      | s, 1H             | –          | C <sub>2</sub> , C <sub>12</sub> , C <sub>14</sub>                   |
| 5        | 4.69       | d, 1H, J = 7.6 Hz | 70.3       | C <sub>20</sub> , C <sub>21</sub>                                    |
| 6        | 4.94       | d, 1H, J = 7.6 Hz | –          | C <sub>5</sub> , C <sub>23</sub> , C <sub>20</sub>                   |
| 7        | 2.04–1.97  | m, 1H             | 31.4       | C <sub>8</sub> , C <sub>23</sub>                                     |
| 7*       | 1.93–1.89  | m, 1H             | 31.4       | C <sub>8</sub> , C <sub>23</sub>                                     |
| 8        | 1.03       | t, 3H, J = 6.0 Hz | 10.1       | C <sub>7</sub> , C <sub>23</sub>                                     |
| 9        | 6.46       | s, 1H             | –          | C <sub>10</sub> , C <sub>21</sub> , C <sub>22</sub>                  |
| 10       | 3.30       | s, 1H             | 61.9       | C <sub>7</sub> , C <sub>10</sub> , C <sub>21</sub> , C <sub>22</sub> |
| 11       | –          | –                 | 159.1      | –                                                                    |
| 12       | –          | –                 | 158.6      | –                                                                    |
| 13       | –          | –                 | 114.2      | –                                                                    |
| 14       | –          | –                 | 113.4      | –                                                                    |
| 15       | –          | –                 | 184.3      | –                                                                    |
| 16       | –          | –                 | 181.9      | –                                                                    |
| 17       | –          | –                 | 130.9      | –                                                                    |
| 18       | –          | –                 | 130.7      | –                                                                    |
| 19       | –          | –                 | 78.9       | –                                                                    |
| 20       | –          | –                 | 142.0      | –                                                                    |
| 21       | –          | –                 | 131.4      | –                                                                    |
| 22       | –          | –                 | 102.7      | –                                                                    |
| 23       | –          | –                 | 90.1       | –                                                                    |

### Lomaiviticin Aglycon (3):



Table of NMR Data and C–H couplings (30% *d*<sub>7</sub>-DMF–CD<sub>3</sub>OD):

| Position | $\delta$ H | Mult, J-Value     | $\delta$ C | HMBC (H-C)                                                           |
|----------|------------|-------------------|------------|----------------------------------------------------------------------|
| 1        | 7.30       | d, 1H, J = 9.5 Hz | 130.6      | C <sub>11</sub> , C <sub>13</sub>                                    |
| 2        | 7.27       | d, 1H, J = 9.5 Hz | 129.6      | C <sub>12</sub> , C <sub>14</sub>                                    |
| 3        | –          | s, 1H             | –          | –                                                                    |
| 4        | –          | s, 1H             | –          | –                                                                    |
| 5        | 4.81       | s, 1H             | 70.4       | C <sub>20</sub> , C <sub>21</sub>                                    |
| 6        | –          | –                 | –          | –                                                                    |
| 7        | 2.16–2.05  | m, 2H             | 31.5       | –                                                                    |
| 8        | 1.20       | t, 3H, J = 7.5 Hz | 10.0       | C <sub>7</sub> , C <sub>23</sub>                                     |
| 9        | –          | –                 | –          | –                                                                    |
| 10       | 3.41       | s, 1H             | 62.1       | C <sub>7</sub> , C <sub>10</sub> , C <sub>21</sub> , C <sub>22</sub> |
| 11       | –          | –                 | 159.1      | –                                                                    |
| 12       | –          | –                 | 158.7      | –                                                                    |
| 13       | –          | –                 | 114.6      | –                                                                    |
| 14       | –          | –                 | 113.7      | –                                                                    |
| 15       | –          | –                 | 184.8      | –                                                                    |
| 16       | –          | –                 | 182.4      | –                                                                    |
| 17       | –          | –                 | 130.4      | –                                                                    |
| 18       | –          | –                 | 128.1      | –                                                                    |
| 19       | –          | –                 | –          | –                                                                    |
| 20       | –          | –                 | 141.8      | –                                                                    |
| 21       | –          | –                 | 132.2      | –                                                                    |
| 22       | –          | –                 | 102.9      | –                                                                    |
| 23       | –          | –                 | 90.6       | –                                                                    |

Comparison of lomaiviticin aglycon (**3**) and lomaiviticin B (**2**). Data for **2** taken from ref. 13. Note: The aglycon **3** is only sparingly soluble in methanol-*d*<sub>4</sub>.

Comparison  
of <sup>1</sup>H NMR  
Data

| Posn<br>(this work) | Posn<br>(ref. 13) | Lomaiv B<br>(CD <sub>3</sub> OD) | <b>3</b> ( <i>d</i> <sub>7</sub> -DMF) | <b>3</b> (CDCl <sub>3</sub> ) | <b>3</b> (30% <i>d</i> <sub>7</sub> -DMF-<br>CD <sub>3</sub> OD) |
|---------------------|-------------------|----------------------------------|----------------------------------------|-------------------------------|------------------------------------------------------------------|
| 10                  | 2                 | 2.64 (br s)                      | 3.3 (s)                                | 3.67 (s)                      | 3.41 (s)                                                         |
| 5                   | 4                 | 4.99 (br s)                      | 4.69 (s)                               | 4.98 (s)                      | 4.81 (s)                                                         |
| 1                   | 8                 | 7.23 (br s)                      | 7.25 (d, 7.2)                          | 7.19 (d, 9.2)                 | 7.3 (d, 9.5)                                                     |
| 2                   | 9                 | 7.22 (br s)                      | 7.18 (d, 7.6)                          | 7.15 (d, 9.2)                 | 7.27 (d, 9.5)                                                    |
| 7                   | 12                | 1.82 (m)                         | 2.04–1.97 (m)                          | 2.42–2.36 (m)                 | 2.16–2.05 (m)                                                    |
| 7*                  | 12                | 1.70 (m)                         | 1.93–1.89 (m)                          | 2.25–2.17 (m)                 | 2.16–2.05 (m)                                                    |
| 8                   | 13                | 0.93 (t, 7)                      | 1.03 (t, 6.0)                          | 1.2 (t, 7.6)                  | 1.2 (t, 7.5)                                                     |

Comparison  
of <sup>13</sup>C NMR  
Data

| Posn<br>(this work) | Posn<br>(ref. 13) | Lomaiv B<br>(CD <sub>3</sub> OD) | <b>3</b> ( <i>d</i> <sub>7</sub> -DMF) | <b>3</b> (CDCl <sub>3</sub> ) | <b>3</b> (30% <i>d</i> <sub>7</sub> -DMF-<br>CD <sub>3</sub> OD) |
|---------------------|-------------------|----------------------------------|----------------------------------------|-------------------------------|------------------------------------------------------------------|
| 22                  | 1                 | 96.5                             | 102.7                                  | 99.4                          | 102.9                                                            |
| 10                  | 2                 | 44                               | 61.9                                   | 61.9                          | 62.1                                                             |
| 23                  | 3                 | 78                               | 90.1                                   | 88.6                          | 90.6                                                             |
| 5                   | 4                 | 78.1                             | 70.3                                   | 68.5                          | 70.4                                                             |
| 20                  | 4a                | 141.7                            | 142                                    | 136.7                         | 141.8                                                            |
| 19                  | 5                 | 76.1                             | 78.9                                   | not obs.                      | not obs.                                                         |
| 17                  | 5a                | 133.4                            | 130.9                                  | 132.3                         | 130.4                                                            |
| 15                  | 6                 | 186.2                            | 184.3                                  | 184.5                         | 184.8                                                            |
| 13                  | 6a                | 114.3                            | 114.2                                  | 112.9                         | 114.6                                                            |
| 11                  | 7                 | 159.3                            | 159.1                                  | 158.5                         | 159.1                                                            |
| 1                   | 8                 | 130.1                            | 129.6                                  | 129.6                         | 130.6                                                            |
| 2                   | 9                 | 130.4                            | 127.9                                  | 129.3                         | 129.6                                                            |
| 12                  | 10                | 159.2                            | 158.6                                  | 158.3                         | 158.7                                                            |
| 14                  | 10a               | 114.5                            | 113.4                                  | 112.5                         | 113.7                                                            |
| 16                  | 11                | 183.6                            | 181.9                                  | 181.5                         | 182.4                                                            |
| 18                  | 11a               | 130.3                            | 130.7                                  | 127.6                         | 128.1                                                            |
| 21                  | 11b               | 125.1                            | 131.4                                  | 126.9                         | 132.2                                                            |
| 7                   | 12                | 25.5                             | 31.4                                   | 32.1                          | 31.5                                                             |
| 8                   | 13                | 7.5                              | 10.1                                   | 9.8                           | 10                                                               |

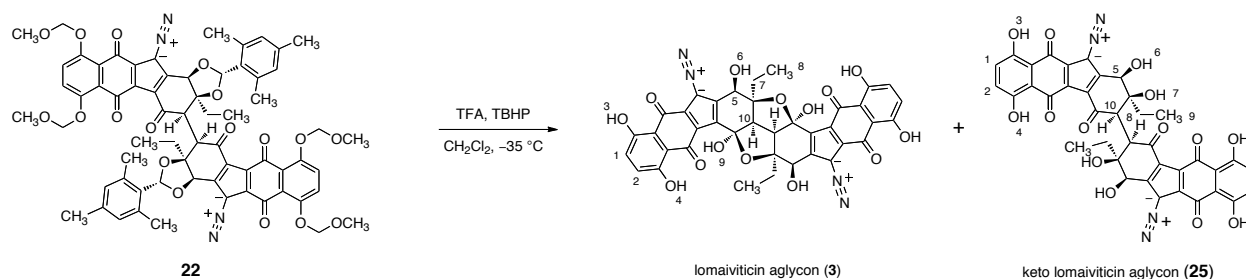

*Procedure To Obtain Mixtures of Lomaiviticin Aglycon (3) And The Ketone Tautomer 25:*

Mixtures of lomaiviticin aglycon (**3**) and the ketone tautomer **25** were isolated when the reaction mixture, obtained as described above, was purified in the following manner:

The unpurified reaction mixture was redissolved in dichloromethane (500  $\mu$ L) and loaded onto a 4-g cartridge of silica gel (SiliaSep® HP flash cartridge, 15–40  $\mu$ m, 60 Å, purchased from Silicycle, Inc, Quebec, CA). The sample was purified using a Biotage Isolera purification system, eluting with a linear gradient of 1% methanol–dichloromethane→10% methanol–dichloromethane over 14 column volumes at a flow rate of 12 mL/min. Samples purified in this manner contained a mixture of **25:3** in variable ratios (10:1–2:1). The ketone tautomer of lomaiviticin aglycon (**25**) was observed to convert to lomaiviticin aglycon (**3**) on standing in chloroform-*d* at 24 °C. Selected NMR data are shown below. Analytically pure samples of **25** could not be obtained owing to its facile conversion to **3**.

**Ketone Tautomer of Lomaiviticin Aglycon (25):**

$t_R = 1.55$ .  $^1\text{H NMR}$  (500 MHz,  $\text{CDCl}_3$ ):  $\delta$  12.94 (s, 1H, H<sub>3</sub>/H<sub>4</sub>), 12.43 (s, 1H, H<sub>3</sub>/H<sub>4</sub>), 7.15–7.12 (m, 2H, H<sub>1</sub>/H<sub>2</sub>), 6.09 (s, 1H, H<sub>7</sub>), 5.11 (d, 1H,  $J = 11.0$  Hz, H<sub>5</sub>), 3.35 (s, 1H, H<sub>10</sub>), 2.26–2.21 (m, 1H, H<sub>8</sub>), 2.09–2.02 (m, 1H, H<sub>8</sub>), 1.13 (t, 3H,  $J = 7.5$  Hz, H<sub>9</sub>). HRMS-Cl ( $m/z$ ):  $[\text{M} + \text{H}]^+$  calcd for  $\text{C}_{38}\text{H}_{27}\text{N}_4\text{O}_{14}$ , 763.1524; found, 763.1526.

### Ketone Tautomer of Lomaiviticin Aglycon (25):

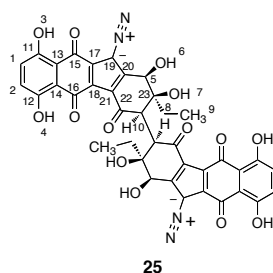

Table of NMR Data and C–H couplings (CDCl<sub>3</sub>):

| Position | $\delta$ H | Mult, J-Value      | $\delta$ C (determined indirectly via HMBC and HMQC experiments) | HMBC (H-C)                                          |
|----------|------------|--------------------|------------------------------------------------------------------|-----------------------------------------------------|
| 1        | 7.15–7.12  | m, 1H              | 130.4                                                            | C <sub>11</sub>                                     |
| 2        | 7.15–7.12  | m, 1H              | 130.4                                                            | C <sub>12</sub>                                     |
| 3        | 12.94      | s, 1H              | –                                                                | C <sub>1</sub> , C <sub>11</sub> , C <sub>13</sub>  |
| 4        | 12.43      | s, 1H              | –                                                                | C <sub>2</sub> , C <sub>12</sub> , C <sub>14</sub>  |
| 5        | 5.11       | d, 1H, J = 11.0 Hz | 68.4                                                             | –                                                   |
| 6        | –          | –                  | –                                                                | –                                                   |
| 7        | 6.09       | s, 1H              | –                                                                | –                                                   |
| 8        | 2.26–2.21  | m, 1H              | 33.3                                                             | C <sub>9</sub> , C <sub>10</sub> , C <sub>23</sub>  |
| 8*       | 2.09–2.02  | m, 1H              | 33.3                                                             | C <sub>9</sub> , C <sub>10</sub> , C <sub>23</sub>  |
| 9        | 1.13       | t, 3H, J = 7.5 Hz  | 9.3                                                              | C <sub>8</sub> , C <sub>23</sub>                    |
| 10       | 3.35       | s, 1H              | 52.7                                                             | C <sub>10</sub> , C <sub>22</sub> , C <sub>23</sub> |
| 11       | –          | –                  | 158.4                                                            |                                                     |
| 12       | –          | –                  | 158.4                                                            |                                                     |
| 13       | –          | –                  | 112.7                                                            |                                                     |
| 14       | –          | –                  | 112.7                                                            |                                                     |
| 22       | –          | –                  | 191.7                                                            |                                                     |
| 23       | –          | –                  | 77.1                                                             |                                                     |

\* C<sub>1</sub>, C<sub>3</sub>, C<sub>11</sub>, C<sub>13</sub> are interchangeable with C<sub>2</sub>, C<sub>4</sub>, C<sub>12</sub>, C<sub>14</sub> respectively.

Comparison of the ketone tautomer of lomaiviticin aglycon (**25**) and lomaiviticin A (**1**). Data for **1** taken from ref. 13. Partial  $^{13}\text{C}$  NMR data was obtained for the ketone tautomer of lomaiviticin aglycon (**25**) by HMBC and HMQC experiments.

Comparison  
of  $^1\text{H}$  NMR  
Data

| Posn<br>(this work) | Posn<br>(ref. 13) | Lomaiv A ( <b>1</b> )<br>( $\text{CD}_3\text{OD}$ ) | <b>25</b> ( $\text{CDCl}_3$ ) |
|---------------------|-------------------|-----------------------------------------------------|-------------------------------|
| 10                  | 2                 | 4.00 (br s)                                         | 3.35 (s)                      |
| 5                   | 4                 | 5.33 (br s)                                         | 5.11 (s)                      |
|                     | 8                 | 7.24 (d, 9.4)                                       | 7.15–7.12<br>(m)              |
| 1                   | 9                 | 7.16 (d, 9.4)                                       | 7.15–7.12<br>(m)              |
| 2                   | 12                | 2.21 (m)                                            | 2.26–2.21<br>(m)              |
| 8                   | 12                | 2.12 (m)                                            | 2.09–2.02<br>(m)              |
| 8*                  | 12                | 2.12 (m)                                            | 2.09–2.02<br>(m)              |
| 9                   | 13                | 1.24 (t, 7)                                         | 1.3 (t, 7.5)                  |

Comparison  
of  $^{13}\text{C}$   
NMR Data

| Posn<br>(this work) | Posn<br>(ref. 13) | Lomaiv A ( <b>1</b> )<br>( $\text{CD}_3\text{OD}$ ) | <b>25</b> ( $\text{CDCl}_3$ ) |
|---------------------|-------------------|-----------------------------------------------------|-------------------------------|
| 22                  | 1                 | 198.4                                               | 191.7                         |
| 10                  | 2                 | 47.6                                                | 52.7                          |
| 23                  | 3                 | 83.6                                                | 77.1                          |
| 5                   | 4                 | 67.3                                                | 68.4                          |
| 13                  | 6a                | 113.4                                               | 112.7                         |
| 11                  | 7                 | 160.4                                               | 158.4                         |
| 1                   | 8                 | 131.1                                               | 130.4                         |
| 2                   | 9                 | 131.3                                               | 130.4                         |
| 12                  | 10                | 159.4                                               | 158.4                         |
| 14                  | 10a               | 114.4                                               | 112.7                         |
| 8                   | 12                | 29.9                                                | 33.3                          |
| 9                   | 13                | 9.6                                                 | 9.3                           |

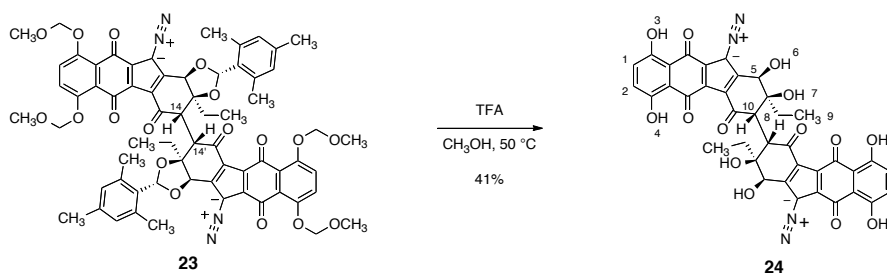

*Deprotection of The (14S,14'S)-Dimeric Diazofluorene 23:*

Trifluoroacetic acid (300  $\mu$ L, 20% v/v) was added to a stirred solution of the (14S,14'S)-dimeric diazofluorene **23** (15.0 mg, 12.5  $\mu$ mol, 1 equiv) in methanol (1.6 mL) at 24  $^{\circ}$ C. The resulting mixture was placed in an oil bath that had been preheated to 50  $^{\circ}$ C. The reaction mixture was stirred and heated for 2 h at 50  $^{\circ}$ C. The product mixture was cooled to 24  $^{\circ}$ C, and the cooled solution was concentrated to dryness under a stream of nitrogen. The residue obtained was dissolved in methanol (2 mL) and *N,N*-dimethylformamide (1 mL). The diluted reaction mixture was loaded directly onto a column of reverse phase silica gel. The mixture was eluted using acetonitrile–water (10% acetonitrile–water initially, grading to 50% acetonitrile–water, one step) to afford the (10S, 10'S)-lomaiviticin aglycon diastereomer **24** as a purple solid (3.9 mg, 41%).

*Note:  $^1$ H and  $^{13}$ C NMR data are normalized to the monomeric structure.*

$R_f$  = 0.43 (5% methanol–dichloromethane; UV).  $t_R$  = 0.98.  $^1$ H NMR (500 MHz,  $d_7$ -DMF):  $\delta$  13.22 (s, 1H, H<sub>3</sub>/H<sub>4</sub>), 12.10 (s, 1H, H<sub>3</sub>/H<sub>4</sub>), 7.25 (d, 1H,  $J$  = 9.5 Hz, H<sub>1</sub>/H<sub>2</sub>), 7.13 (d, 1H,  $J$  = 9.5 Hz, H<sub>1</sub>/H<sub>2</sub>), 6.19 (d, 1H,  $J$  = 9.0 Hz, H<sub>6</sub>), 5.26 (d, 1H,  $J$  = 9.0 Hz, H<sub>5</sub>), 4.91 (s, 1H, H<sub>7</sub>), 3.12 (s, 1H, H<sub>10</sub>), 2.27–2.22 (m, 1H, H<sub>14</sub>), 2.02–1.97 (m, 1H, H<sub>14</sub>), 1.09 (t, 3H,  $J$  = 7.5 Hz, H<sub>9</sub>).  $^{13}$ C NMR (125 MHz, CDCl<sub>3</sub>): 193.4 (C), 183.2 (C), 182.2 (C), 159.3 (C), 158.5 (C), 151.2 (C), 132.9 (C), 130.9 (CH), 129.8 (CH), 127.9 (C), 127.4 (C), 113.8 (C), 112.7 (C), 81.4 (C), 80.2 (C), 69.6 (CH), 60.1 (CH), 28.1 (CH<sub>2</sub>), 7.8 (CH<sub>3</sub>). IR (ATR-FTIR),  $\text{cm}^{-1}$ : 2922 (s), 2152 (m), 1661 (m), 1445 (m). HRMS-CI ( $m/z$ ): [M + H]<sup>+</sup> calcd for C<sub>38</sub>H<sub>27</sub>N<sub>4</sub>O<sub>14</sub>, 763.1524; found, 763.1522.



**(10*S*, 10'*S*)-Lomaiviticin Aglycon Diastereomer 24:**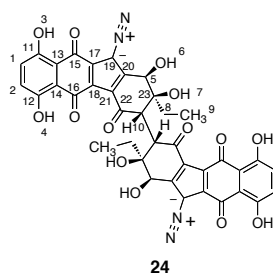Table of NMR Data and C–H couplings (*d*<sub>7</sub>-DMF):

| Position | $\delta$ H | Mult, J-Value     | $\delta$ C | HMBC (H-C)                                                                             |
|----------|------------|-------------------|------------|----------------------------------------------------------------------------------------|
| 1        | 7.25       | d, 1H, J = 9.5 Hz | 130.9      | C <sub>11</sub> , C <sub>13</sub>                                                      |
| 2        | 7.13       | d, 1H, J = 9.5 Hz | 129.8      | C <sub>12</sub> , C <sub>14</sub>                                                      |
| 3        | 13.22      | s, 1H             | –          | C <sub>1</sub> , C <sub>11</sub> , C <sub>13</sub>                                     |
| 4        | 12.10      | s, 1H             | –          | C <sub>2</sub> , C <sub>12</sub> , C <sub>14</sub>                                     |
| 5        | 5.26       | d, 1H, J = 9.0 Hz | 69.6       | C <sub>20</sub> , C <sub>21</sub>                                                      |
| 6        | 6.19       | d, 1H, J = 9.0 Hz | –          | C <sub>5</sub> , C <sub>20</sub>                                                       |
| 7        | 4.91       | s, 1H             | –          | C <sub>5</sub> , C <sub>10</sub> , C <sub>23</sub>                                     |
| 8        | 2.27–2.22  | m, 1H             | 28.1       | C <sub>5</sub> , C <sub>9</sub> , C <sub>10</sub> , C <sub>23</sub>                    |
| 8*       | 2.02–1.97  | m, 1H             | 28.1       | C <sub>5</sub> , C <sub>9</sub> , C <sub>10</sub> , C <sub>23</sub>                    |
| 9        | 1.09       | t, 3H, J = 7.5 Hz | 7.8        | C <sub>8</sub> , C <sub>19</sub>                                                       |
| 10       | 3.12       | s, 1H             | 60.1       | C <sub>5</sub> , C <sub>10</sub> , C <sub>19</sub> , C <sub>21</sub> , C <sub>22</sub> |
| 11       | –          | –                 | 159.5      |                                                                                        |
| 12       | –          | –                 | 158.5      |                                                                                        |
| 13       | –          | –                 | 113.8      |                                                                                        |
| 14       | –          | –                 | 112.7      |                                                                                        |
| 15       | –          | –                 | 183.2      |                                                                                        |
| 16       | –          | –                 | 182.2      |                                                                                        |
| 17       | –          | –                 | 132.9      |                                                                                        |
| 18       | –          | –                 | 127.9      |                                                                                        |
| 19       | –          | –                 | 80.2       |                                                                                        |
| 20       | –          | –                 | 151.2      |                                                                                        |
| 21       | –          | –                 | 127.4      |                                                                                        |
| 22       | –          | –                 | 193.4      |                                                                                        |
| 23       | –          | –                 | 81.4       |                                                                                        |

\* C<sub>1</sub>, C<sub>3</sub>, C<sub>11</sub>, C<sub>13</sub>, C<sub>15</sub>, C<sub>17</sub> are interchangeable with C<sub>2</sub>, C<sub>4</sub>, C<sub>12</sub>, C<sub>14</sub>, C<sub>16</sub>, C<sub>18</sub> respectively.

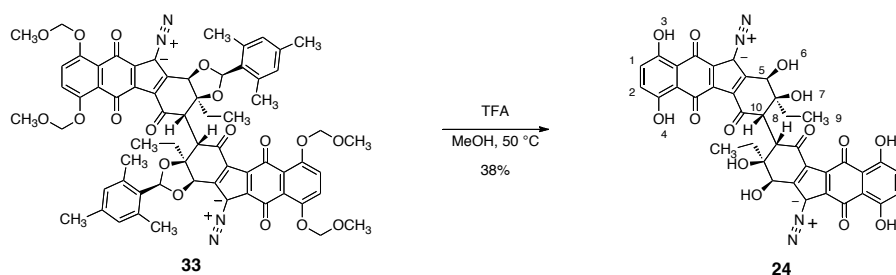

*Deprotection of The (14S,14'S)-Endo-mesityl-dimeric Diazofluorene 33:*

Trifluoroacetic acid (360  $\mu\text{L}$ , 20% v/v) was added to a stirred solution of the (14S,14'S)-*endo*-mesityl-dimeric diazofluorene **33** (21.6 mg, 18.0  $\mu\text{mol}$ , 1 equiv) in methanol (1.8 mL) at 24  $^\circ\text{C}$ . The resulting mixture was placed in an oil bath that had been preheated to 50  $^\circ\text{C}$ . The reaction mixture was stirred and heated for 4 h at 50  $^\circ\text{C}$ . The product mixture was cooled to 24  $^\circ\text{C}$  and the cooled solution was concentrated to dryness under a stream of nitrogen. The residue obtained was dissolved in a mixture of methanol-, and was purified by elution over a column of reverse phase silica gel (eluting with 10% acetonitrile–water initially, grading to 50% acetonitrile–water, one step) to afford the (10S, 10'S)-lomaiviticin aglycon diastereomer **24** as a purple solid (5.2 mg, 38%).  $^1\text{H}$  NMR and UPLC/MS data of **24** obtained in this manner were indistinguishable from the product obtained by deprotection of the (14S,14'S)-dimeric diazofluorene **23** (vide supra).

## Catalog of Nuclear Magnetic Resonance and Infrared Spectra

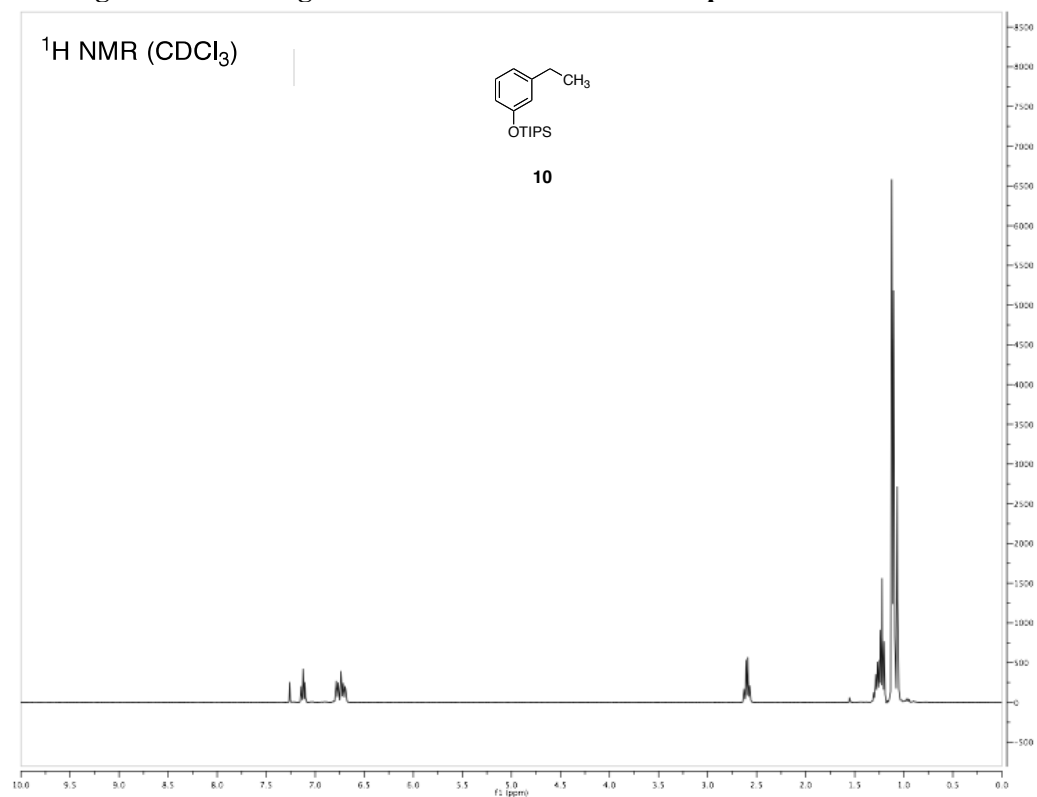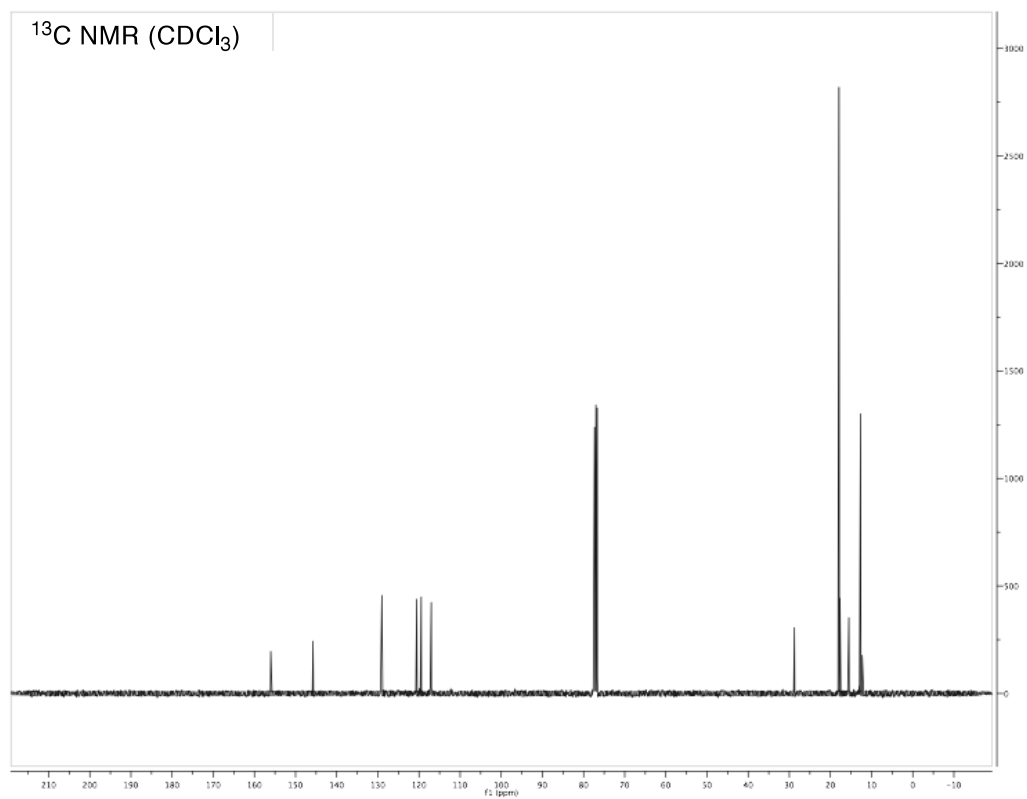

# IR

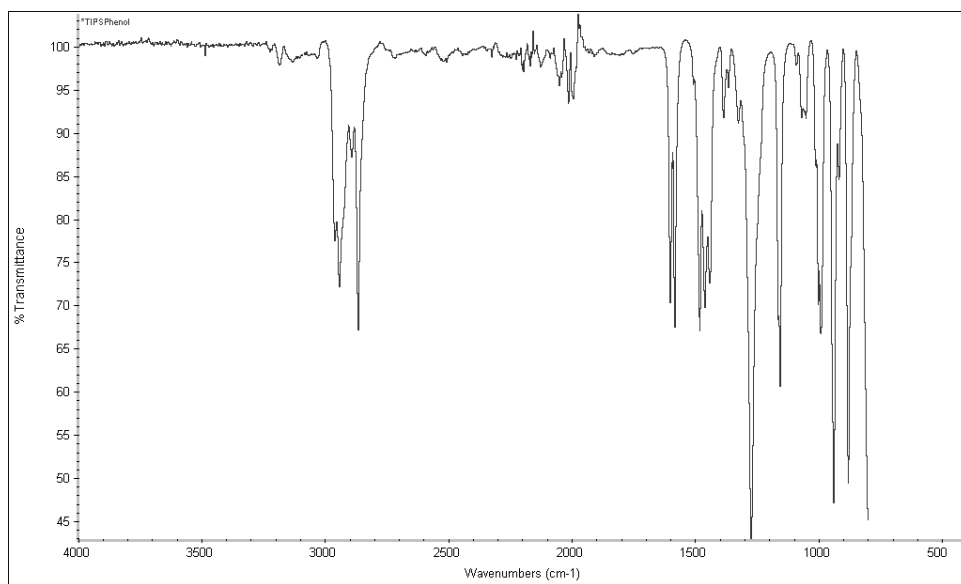

$^1\text{H}$  NMR ( $\text{CDCl}_3$ )

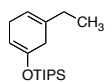

**27**

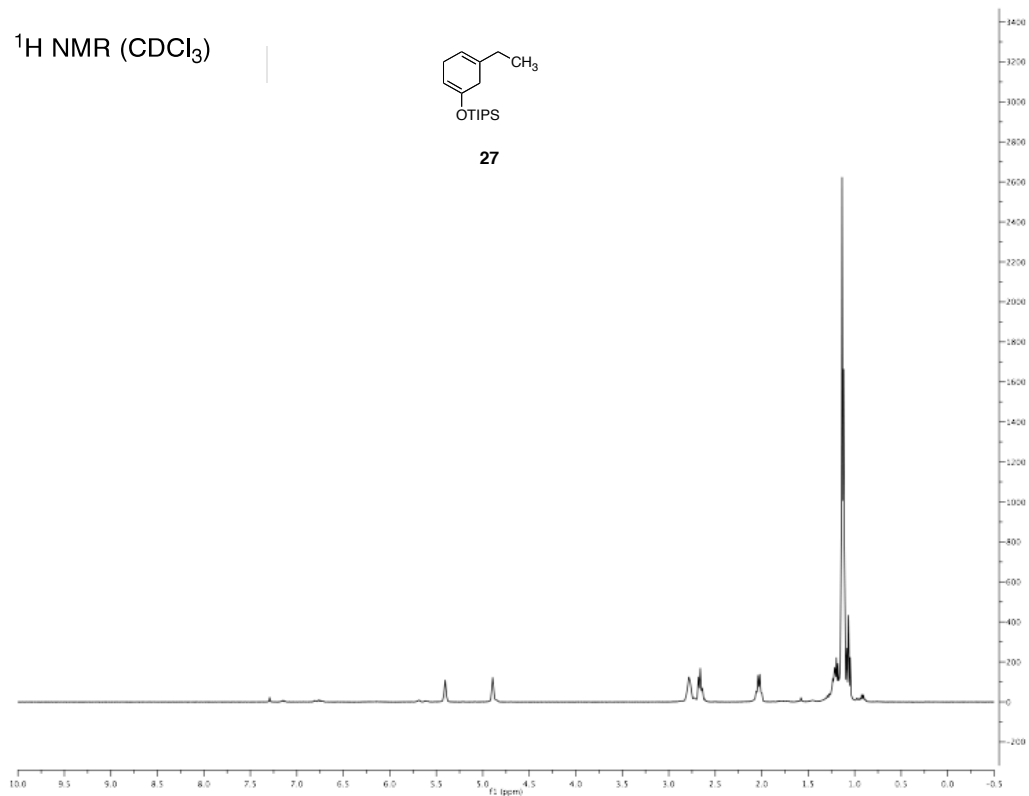

$^{13}\text{C}$  NMR ( $\text{CDCl}_3$ )

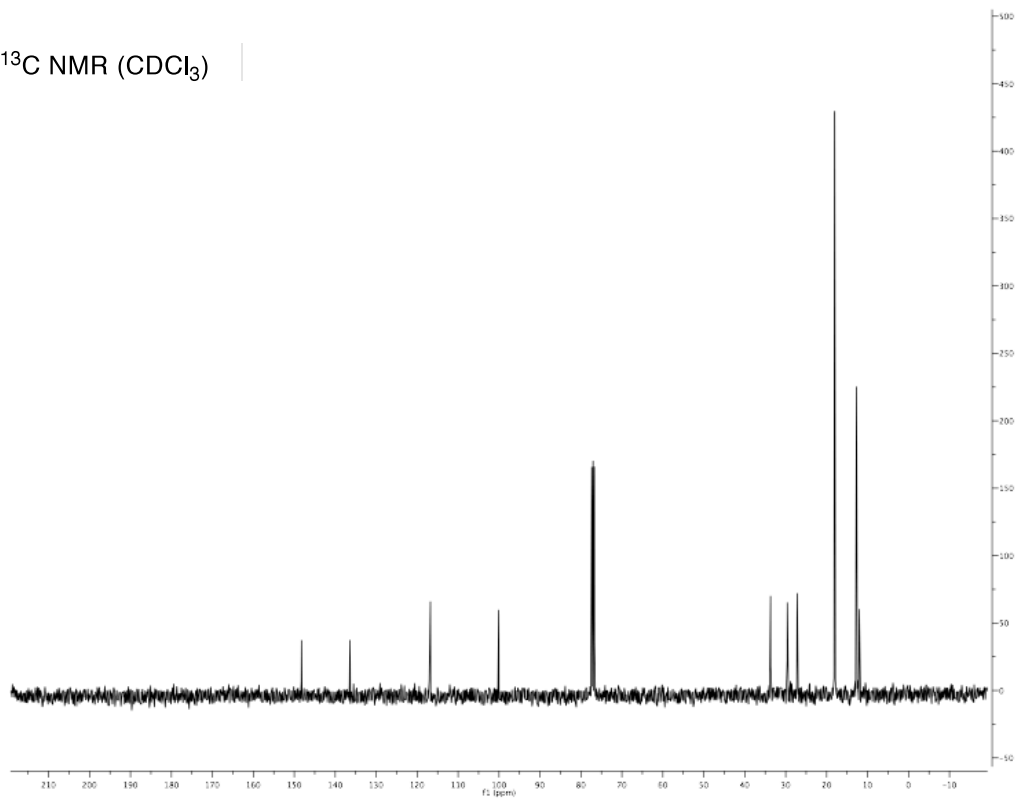

IR

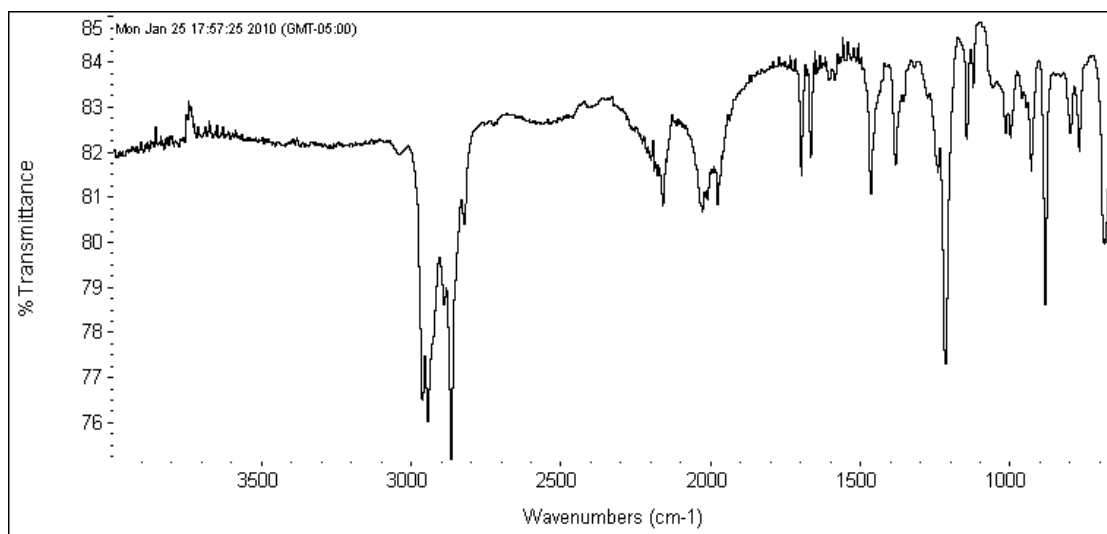

$^1\text{H}$  NMR ( $\text{CDCl}_3$ )

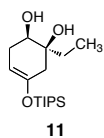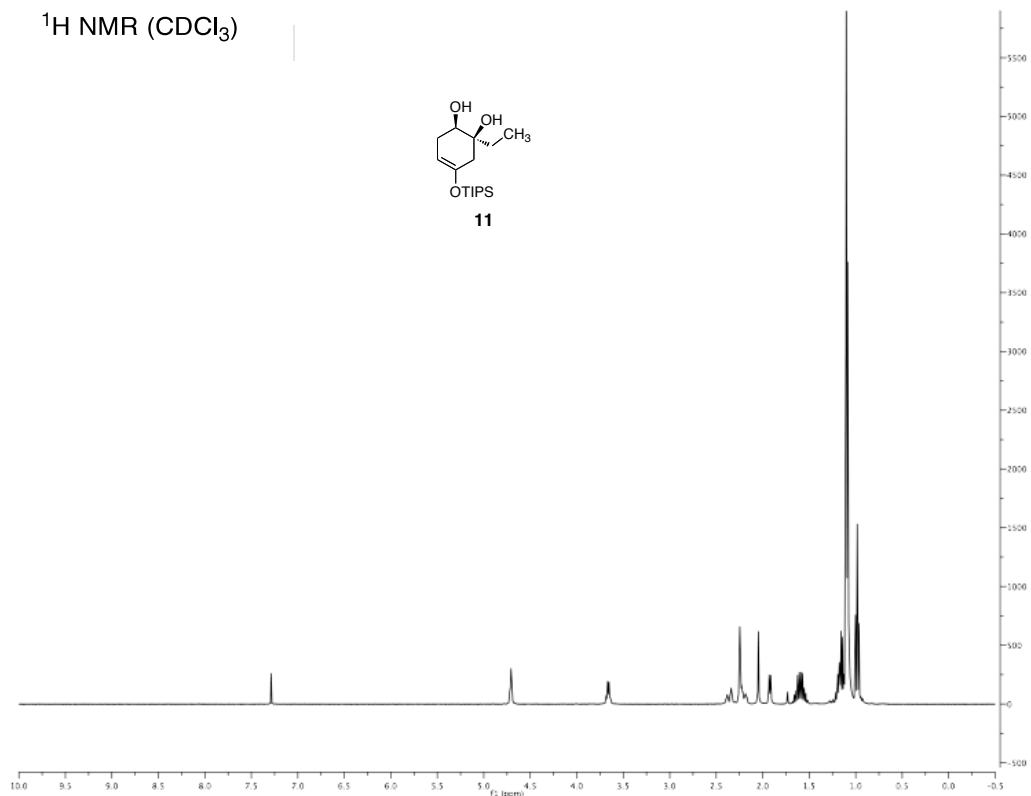

$^{13}\text{C}$  NMR ( $\text{CDCl}_3$ )

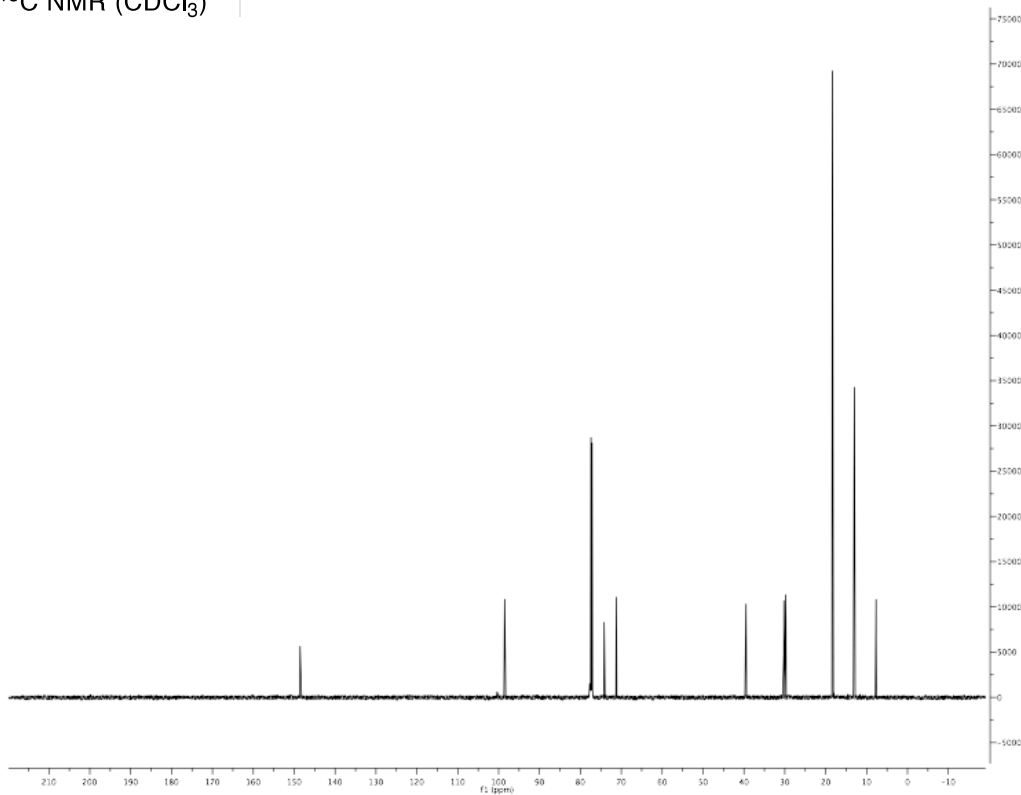

IR

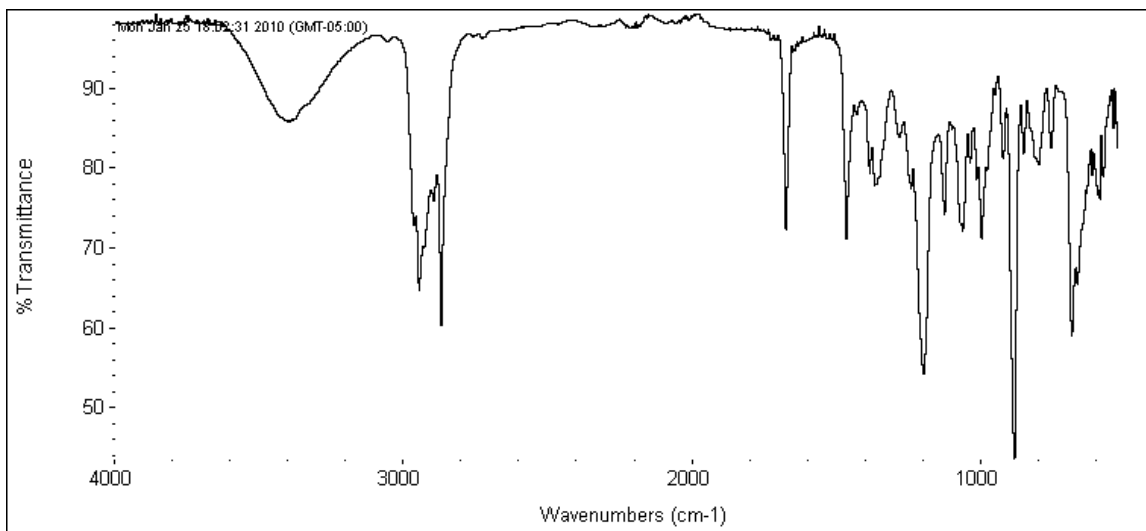



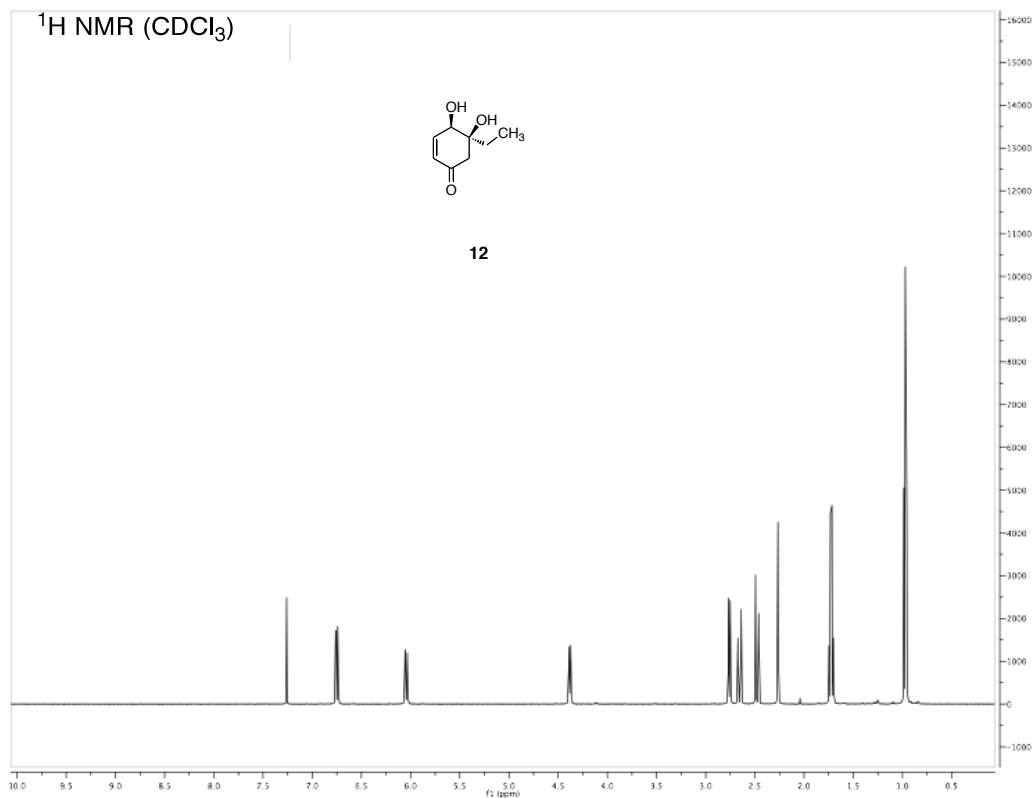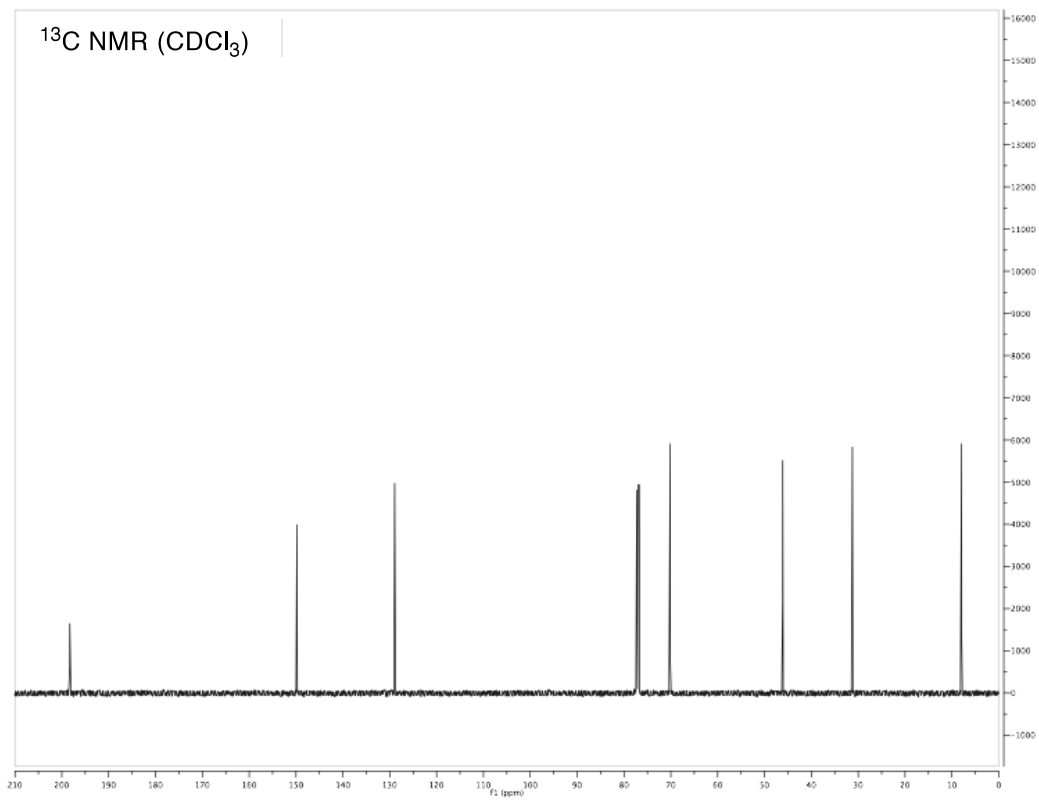

IR

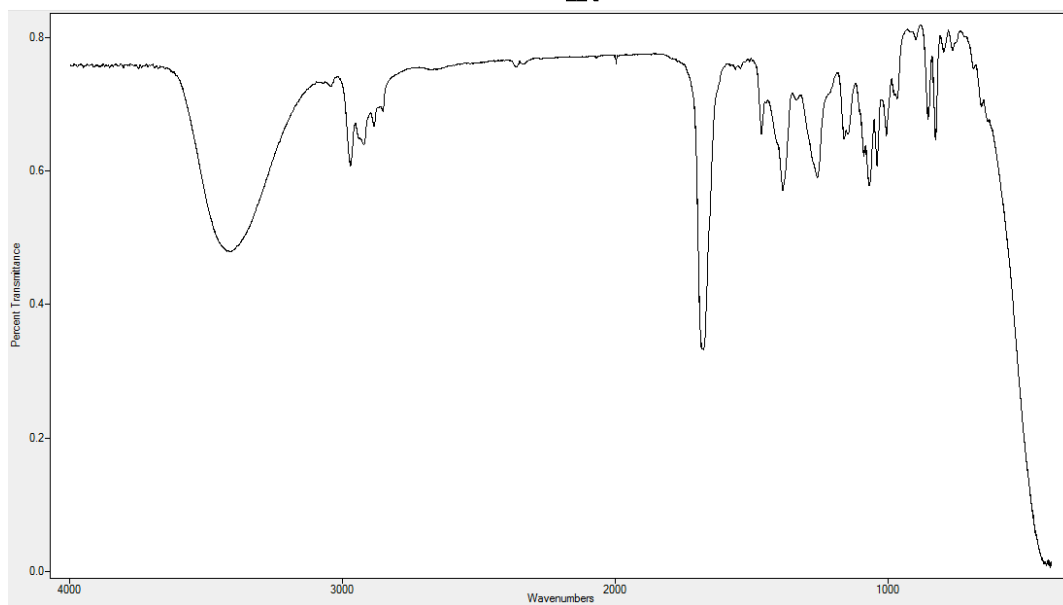

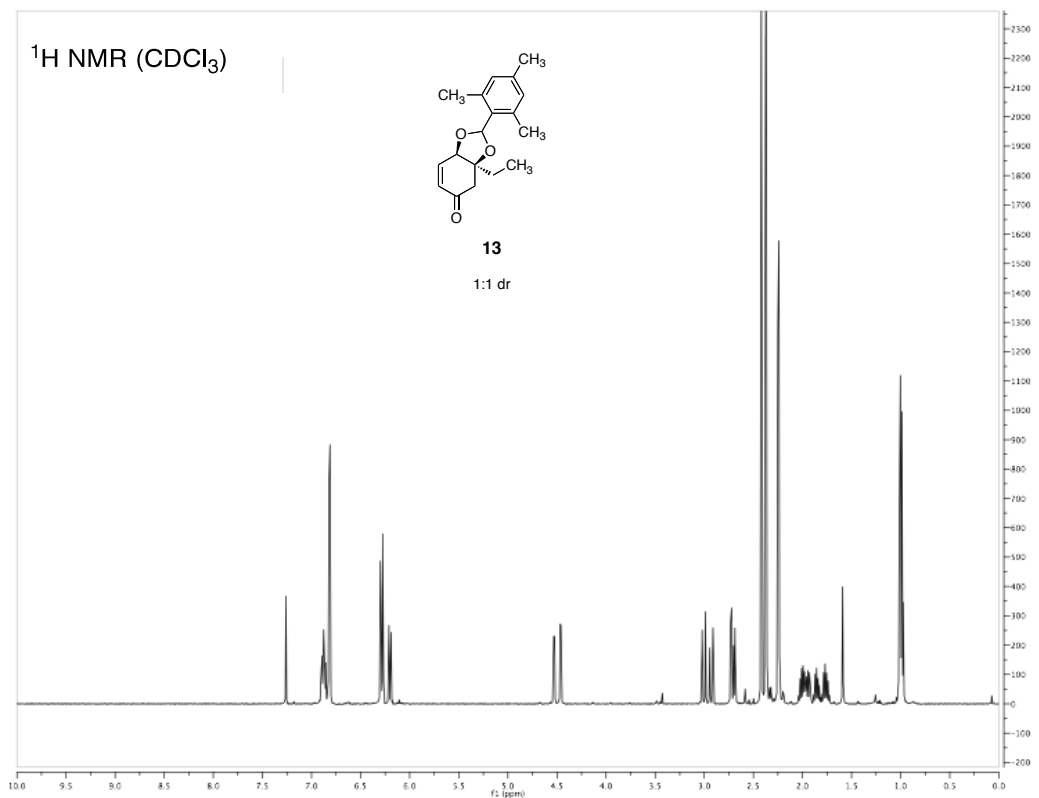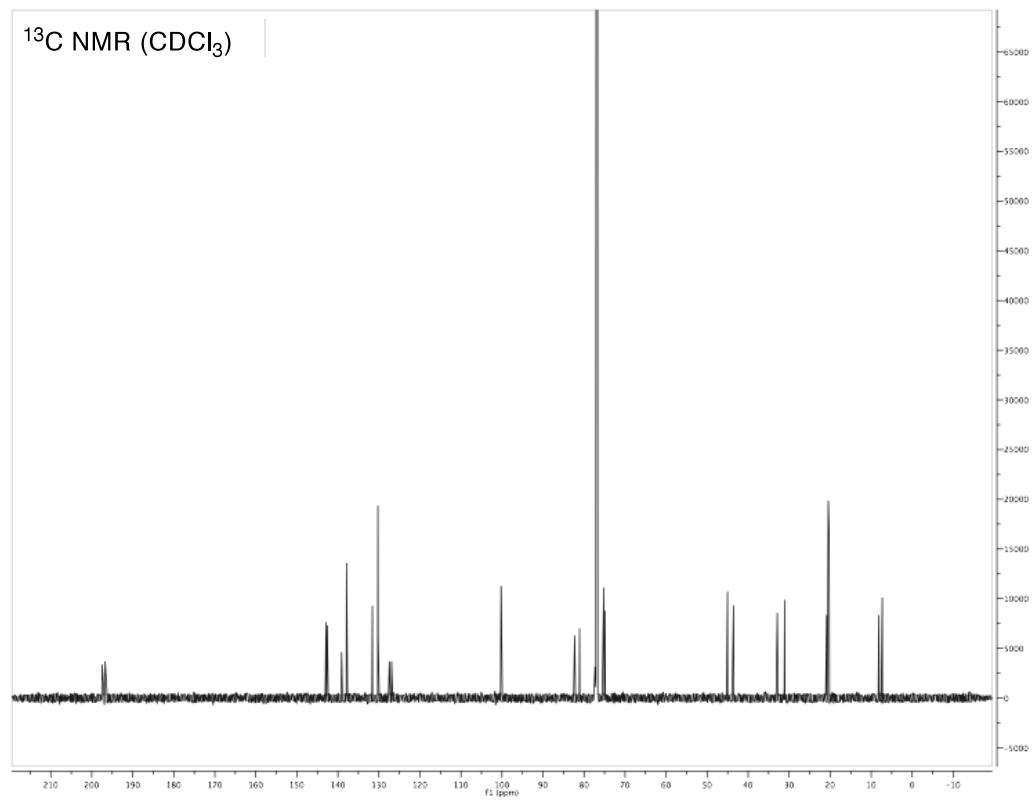

# IR

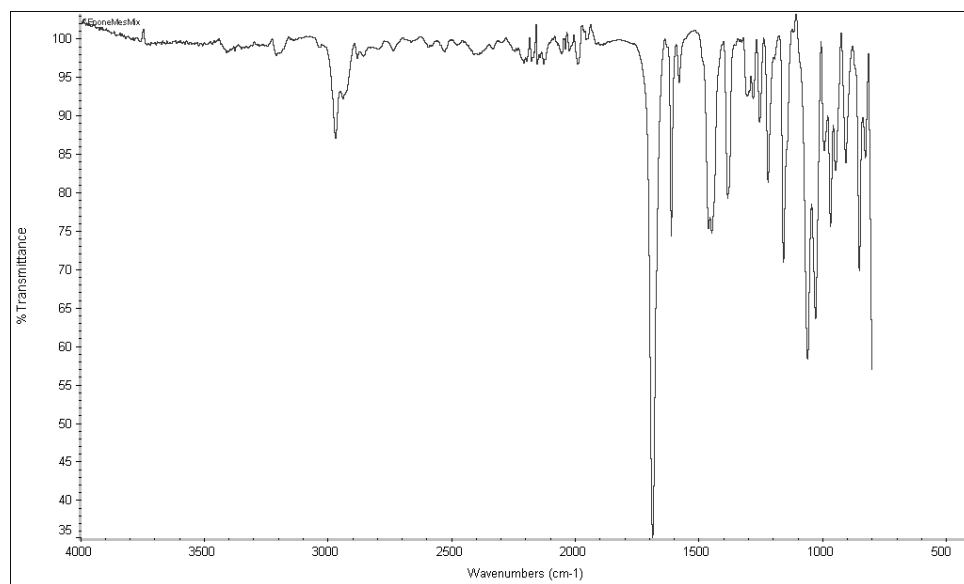

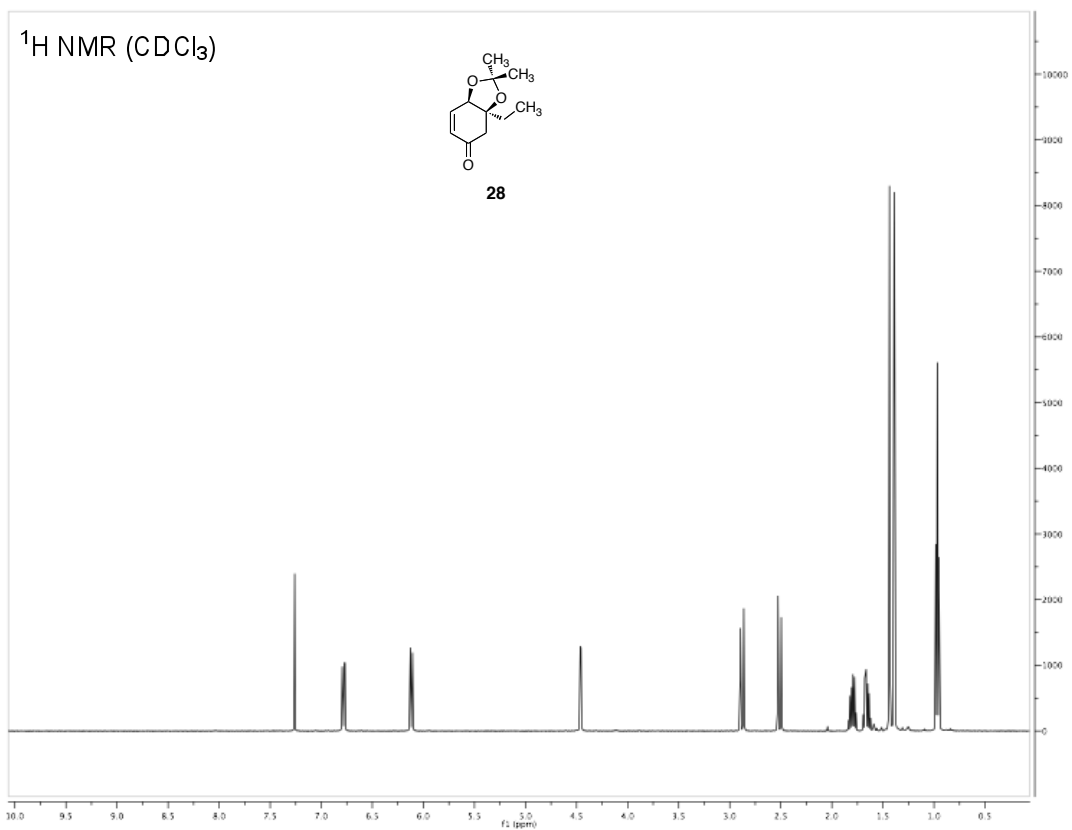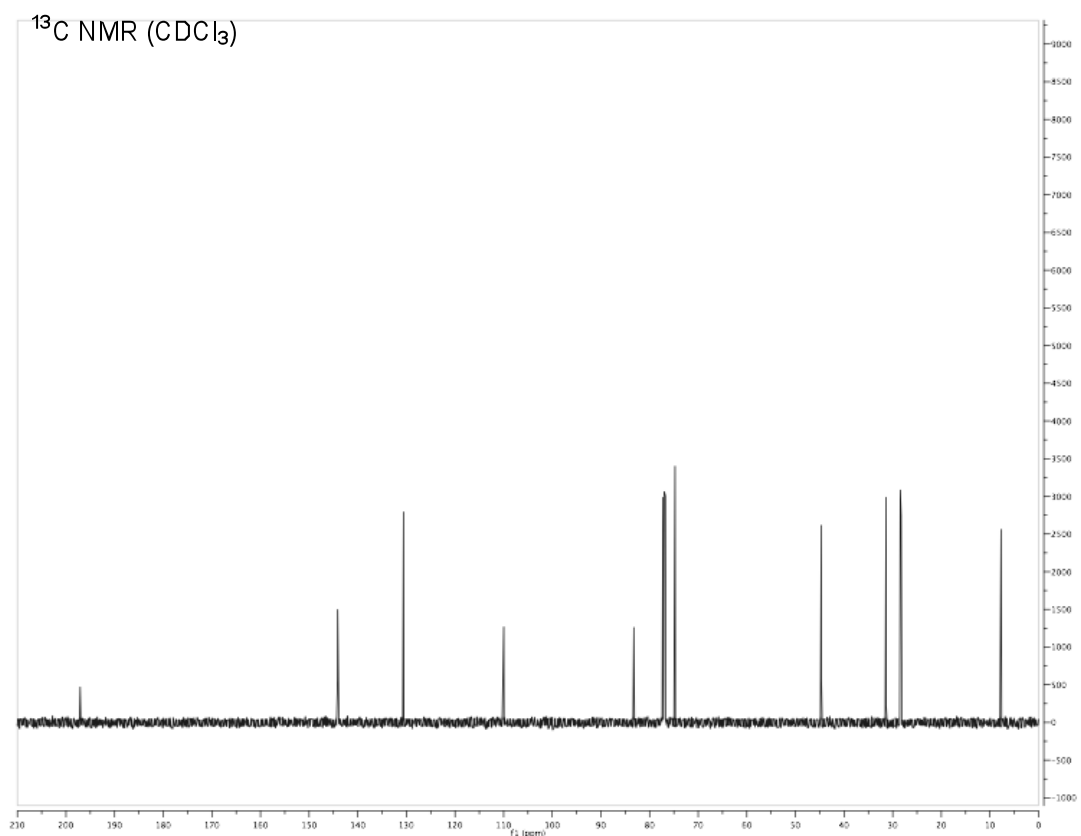

IR

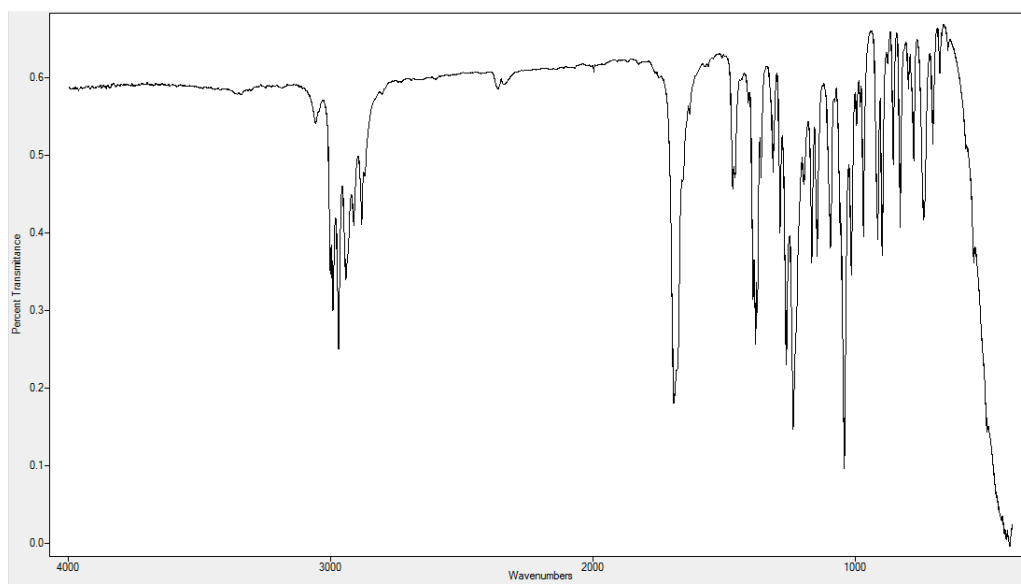

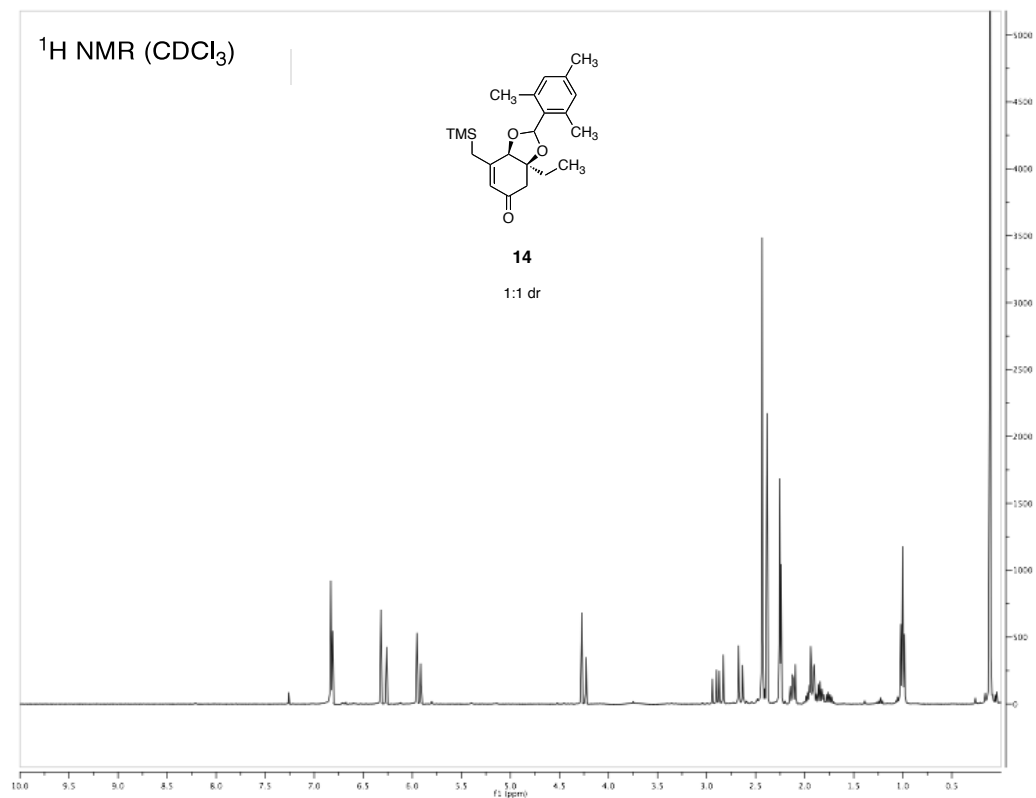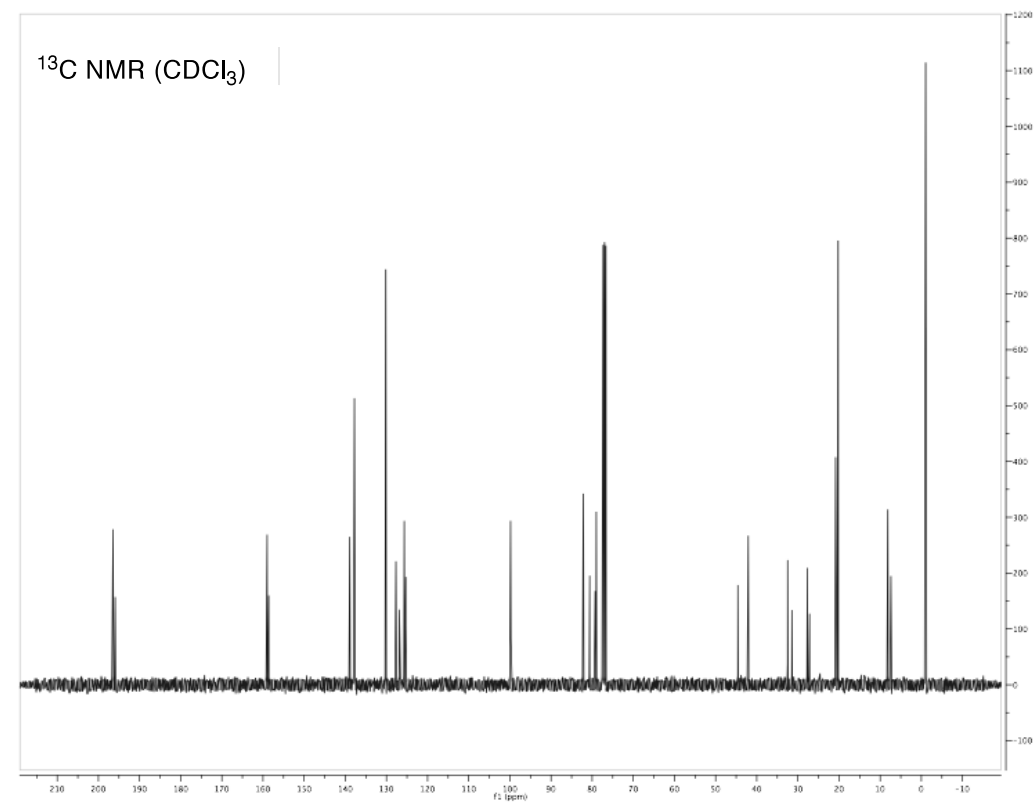

# IR

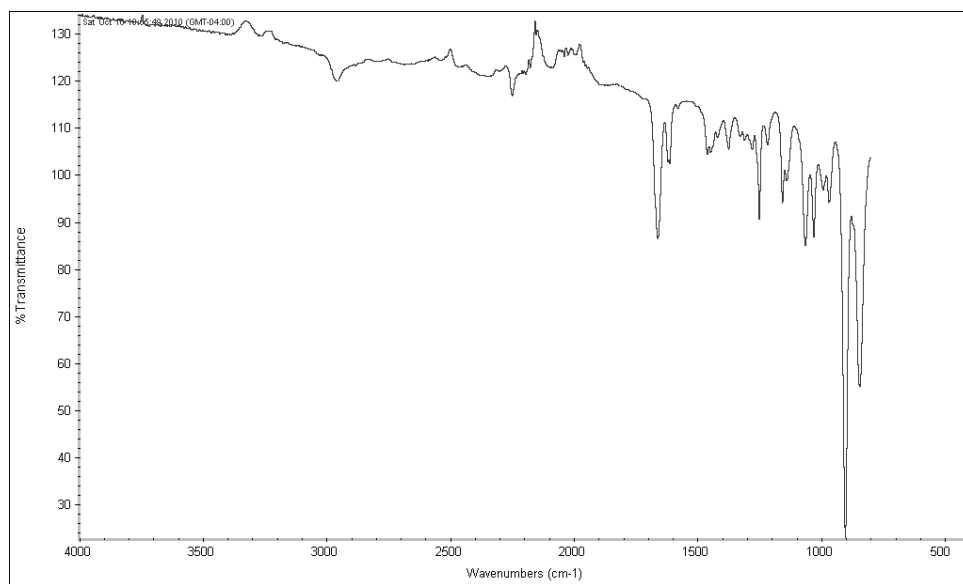



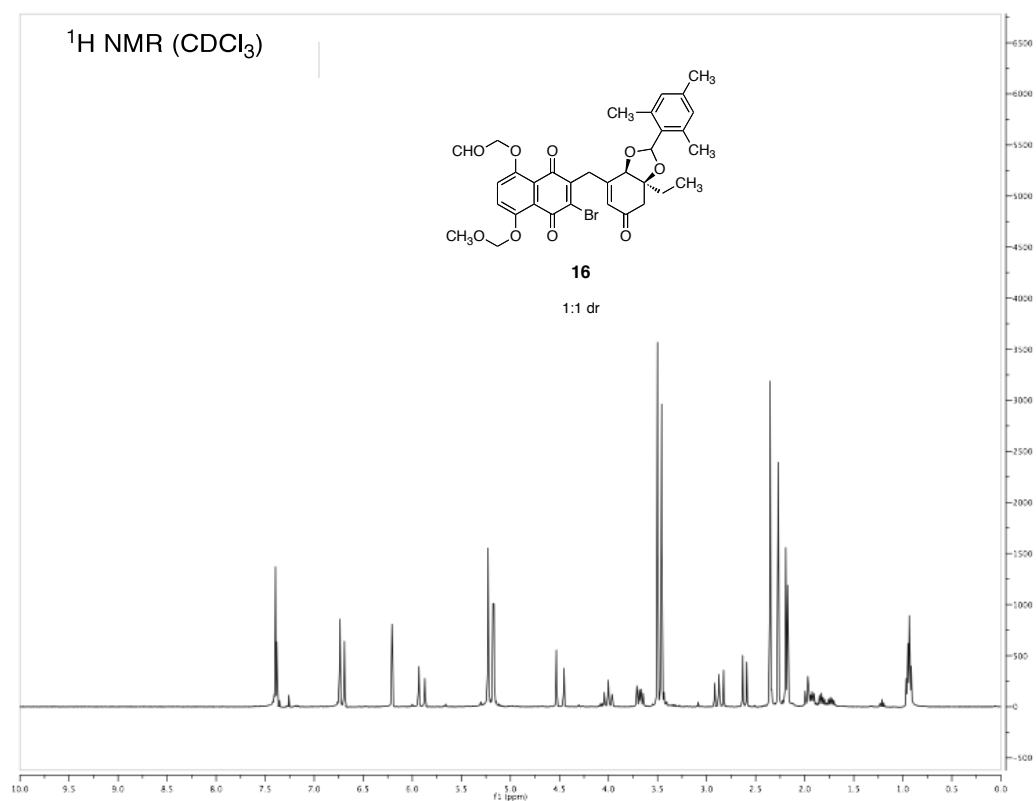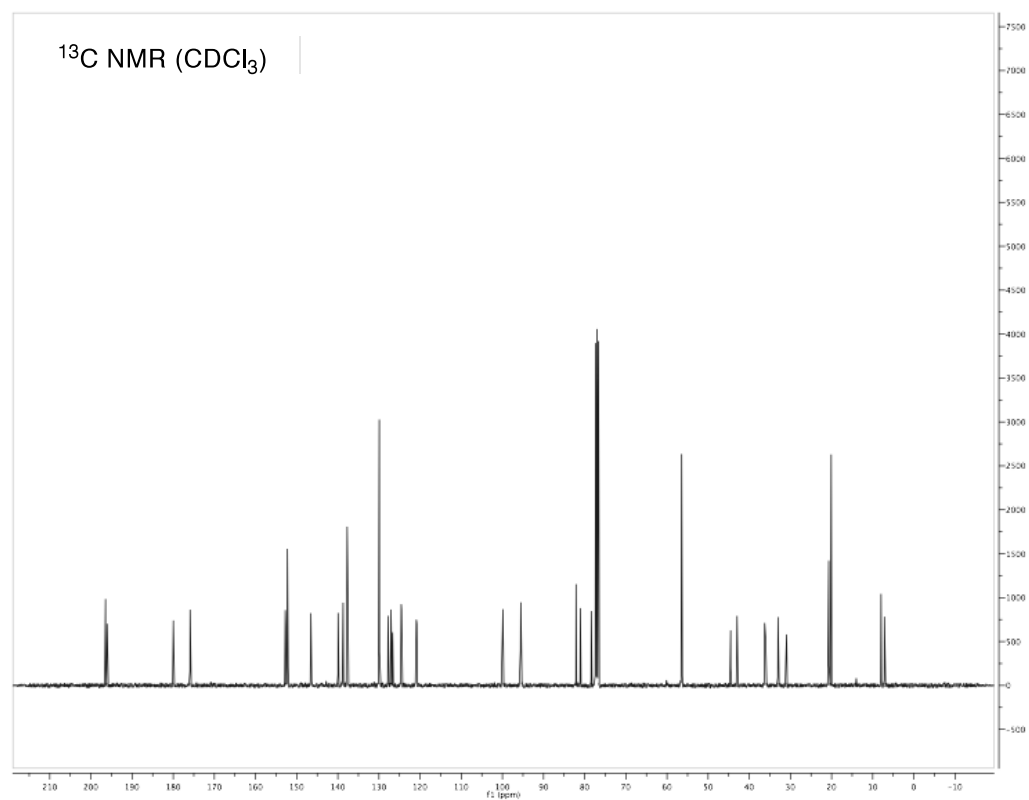

# IR

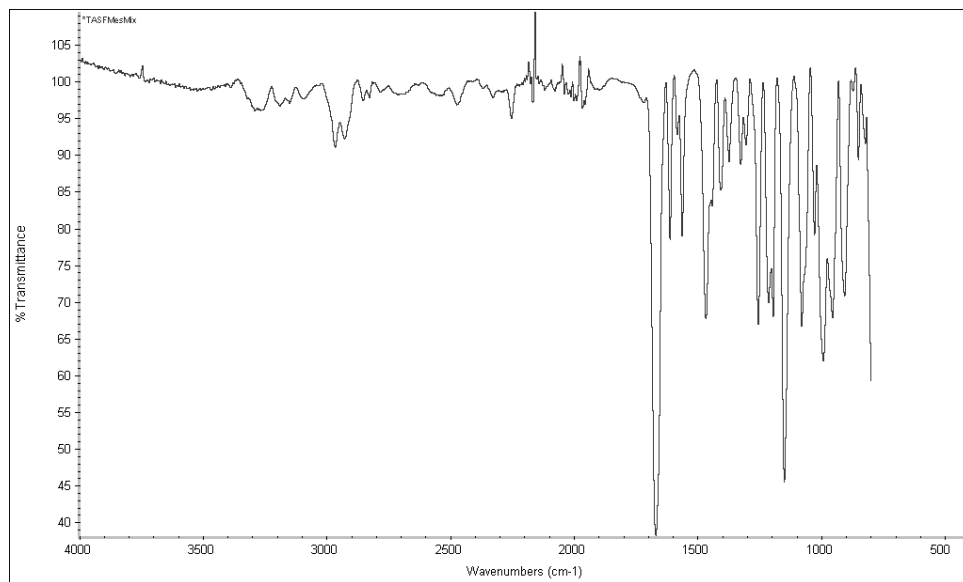

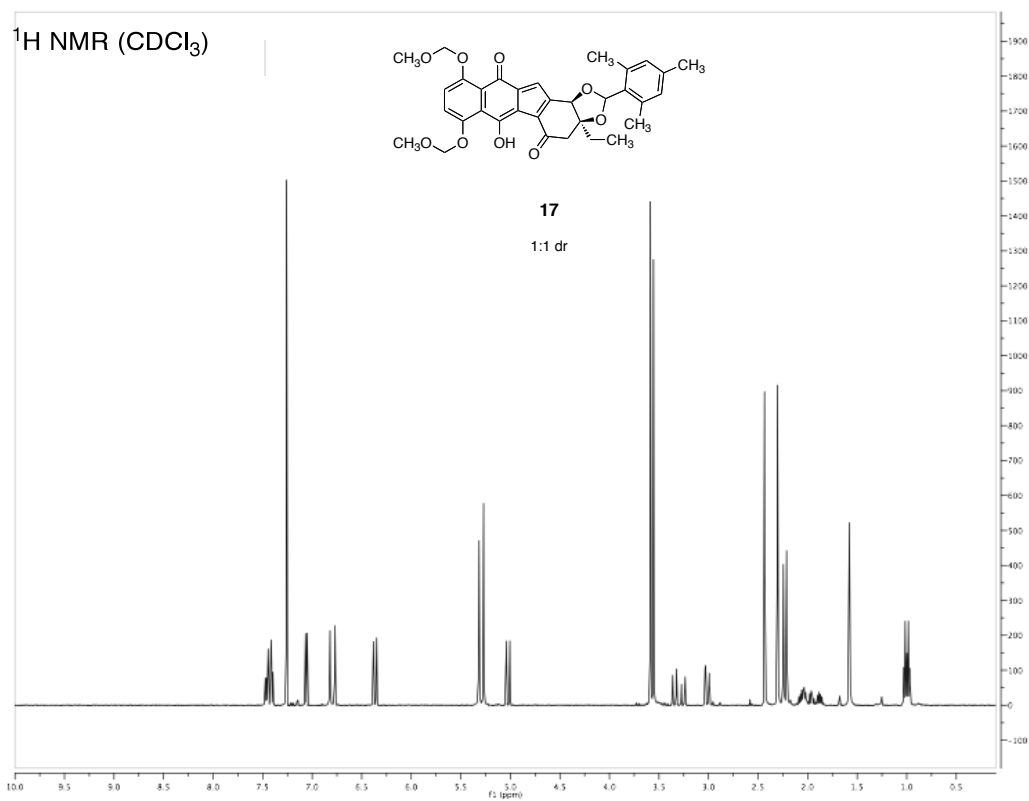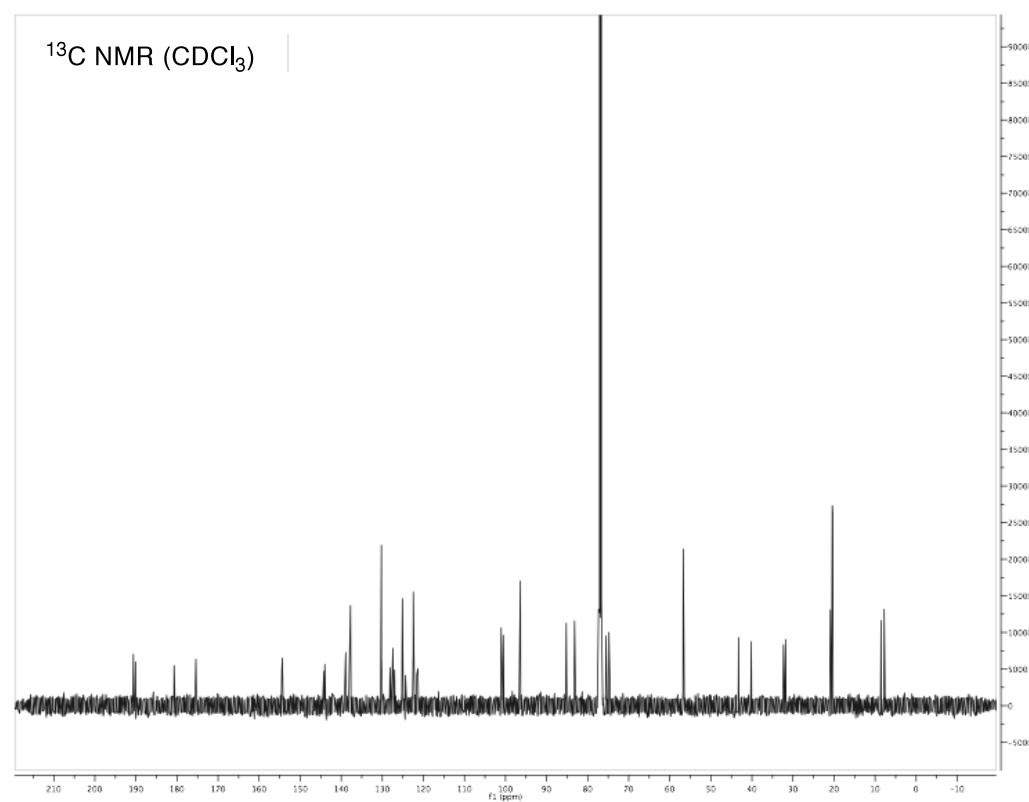

# IR

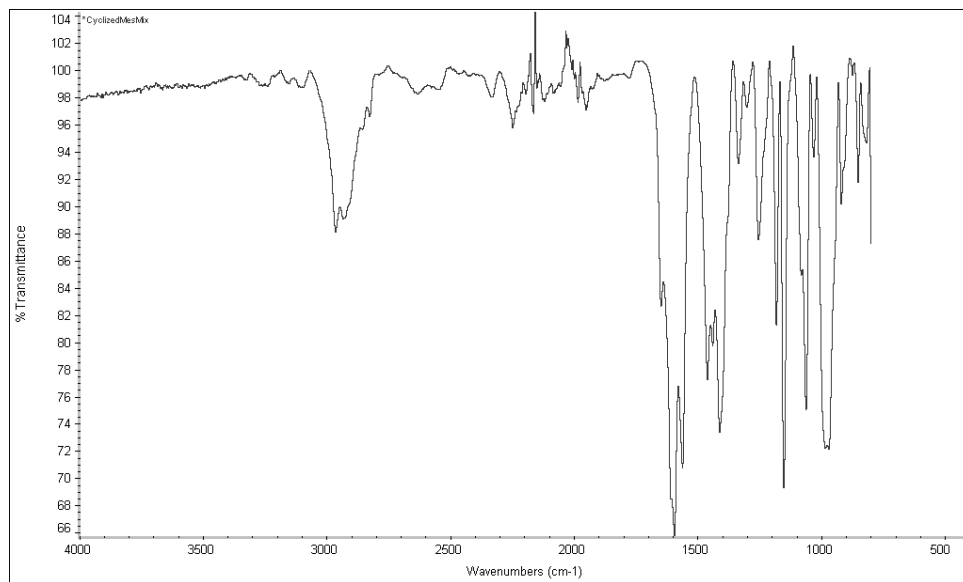

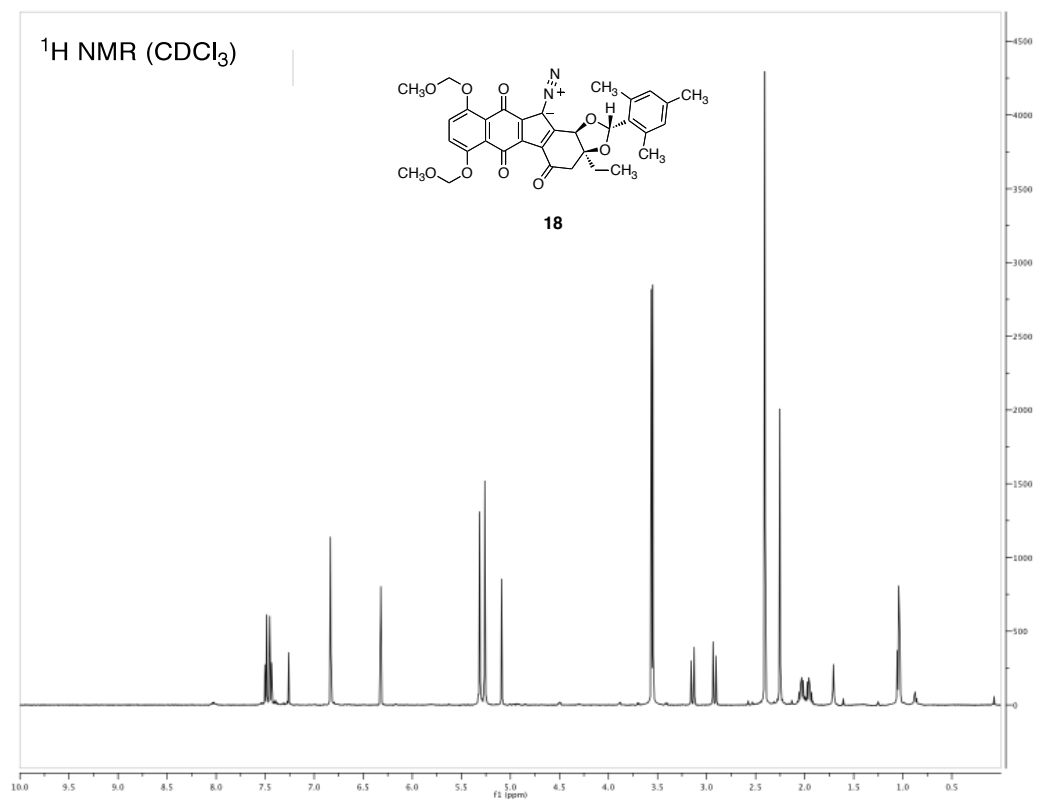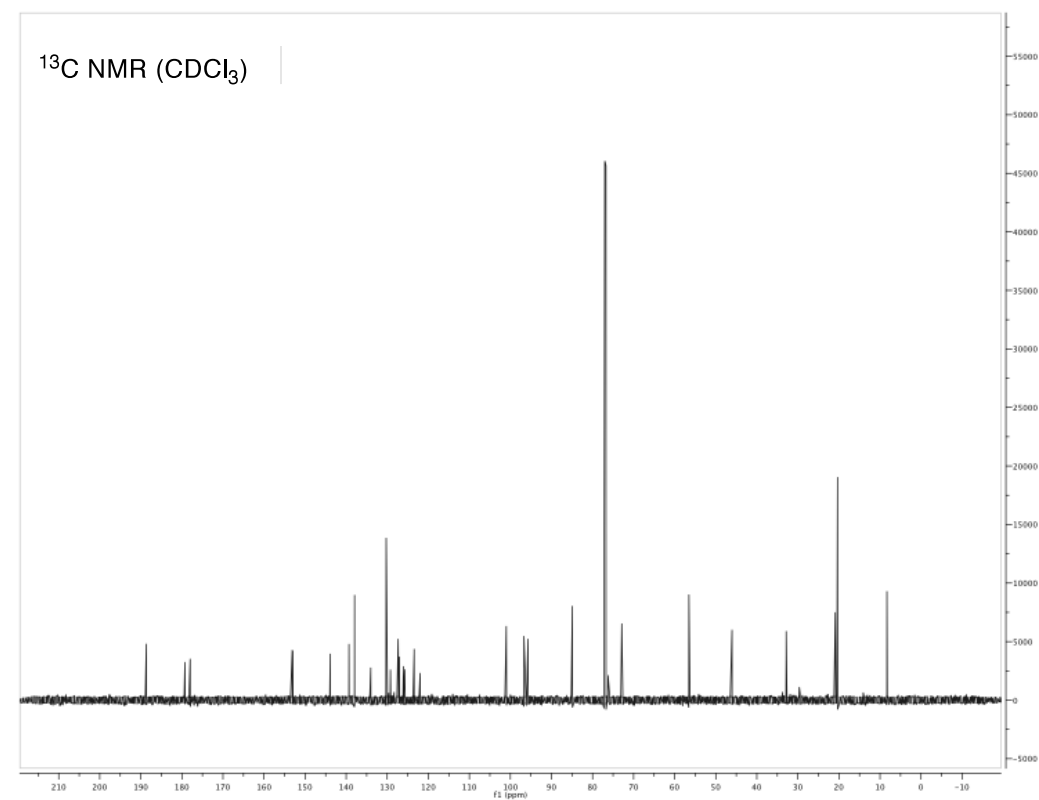

# IR

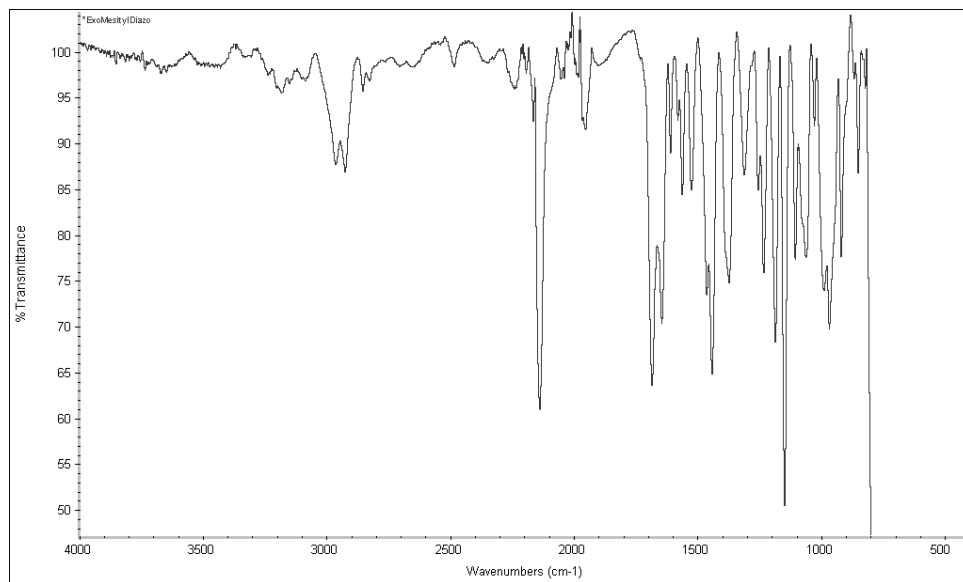

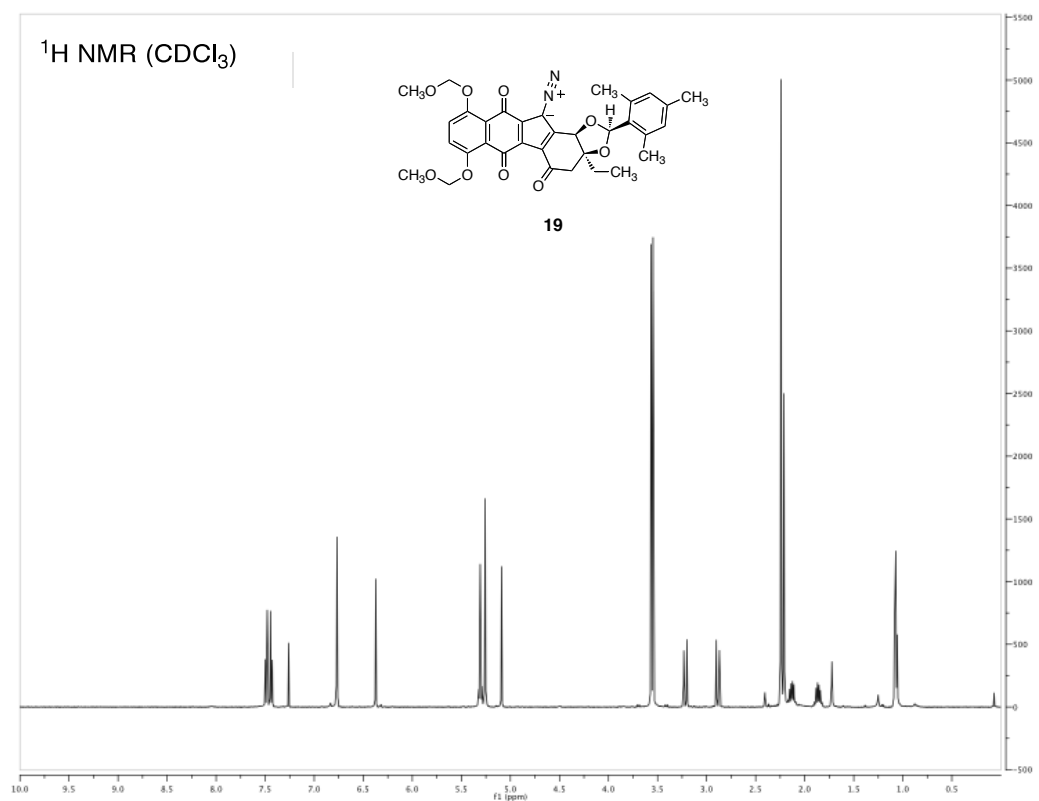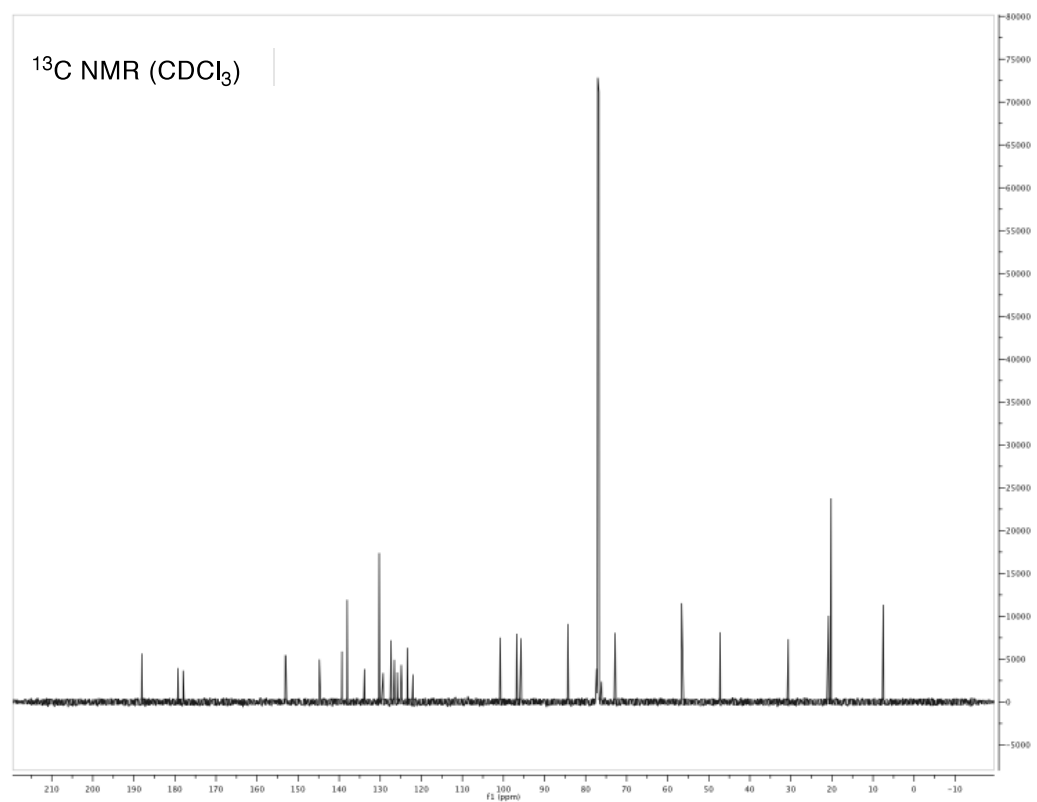

# IR

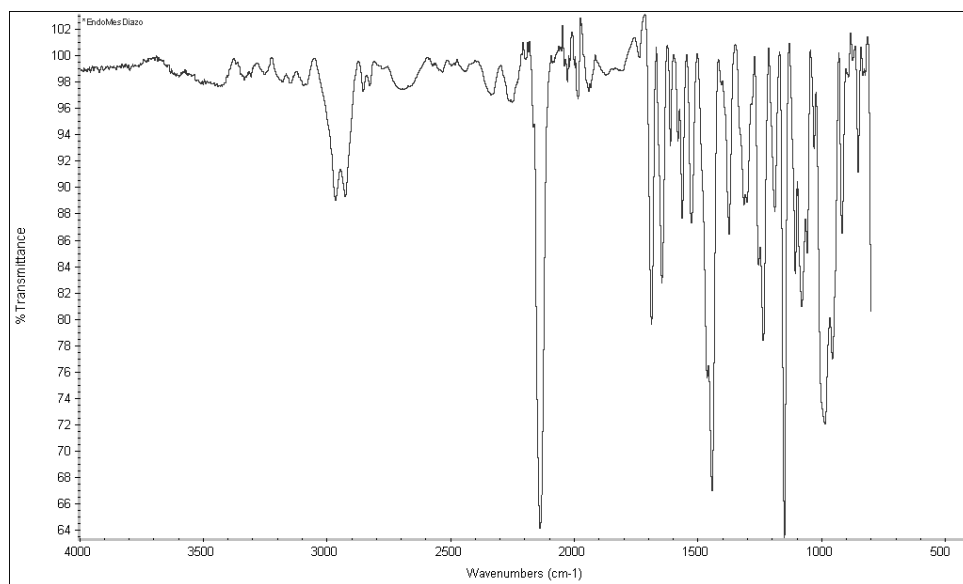



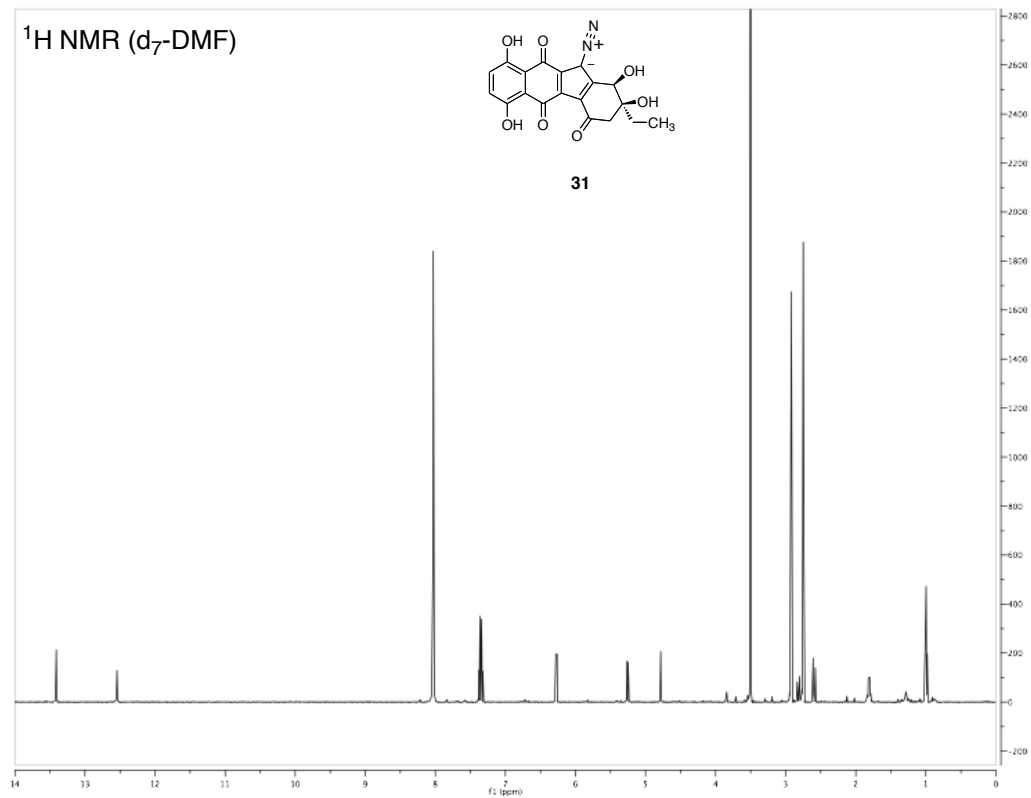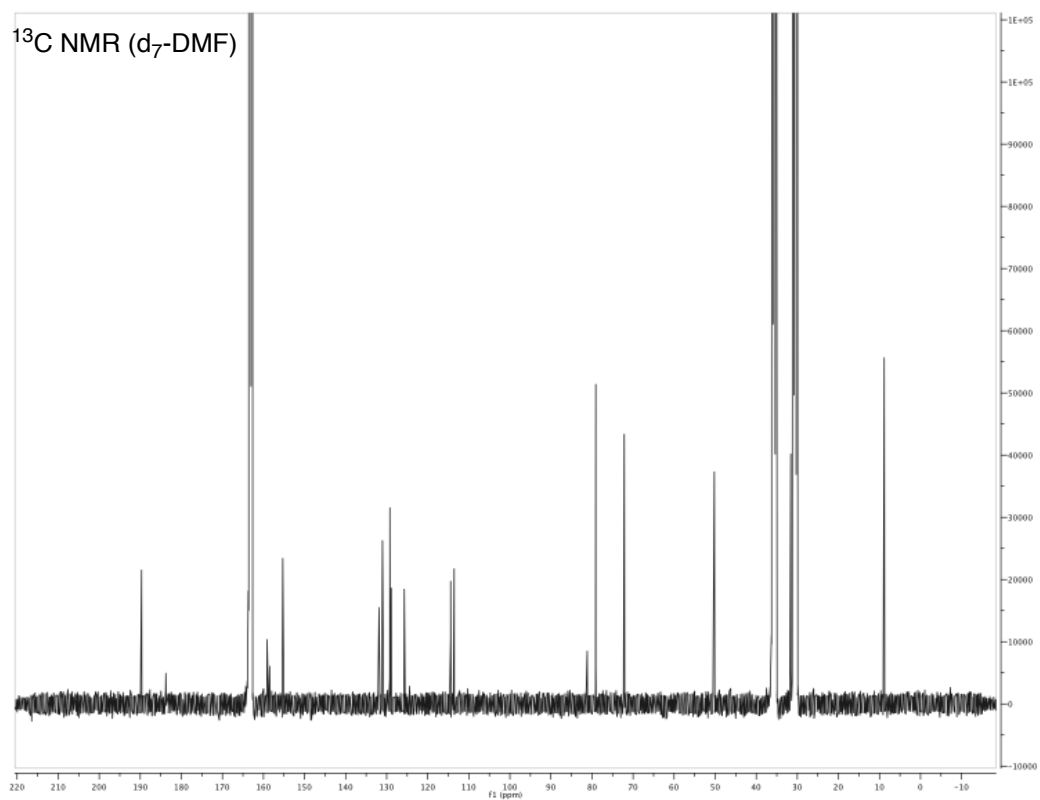

# IR

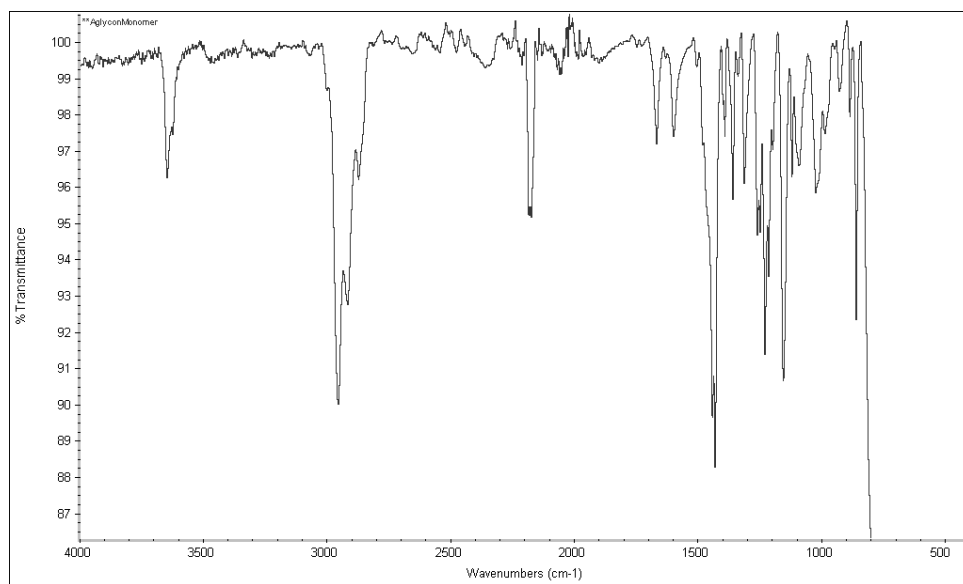

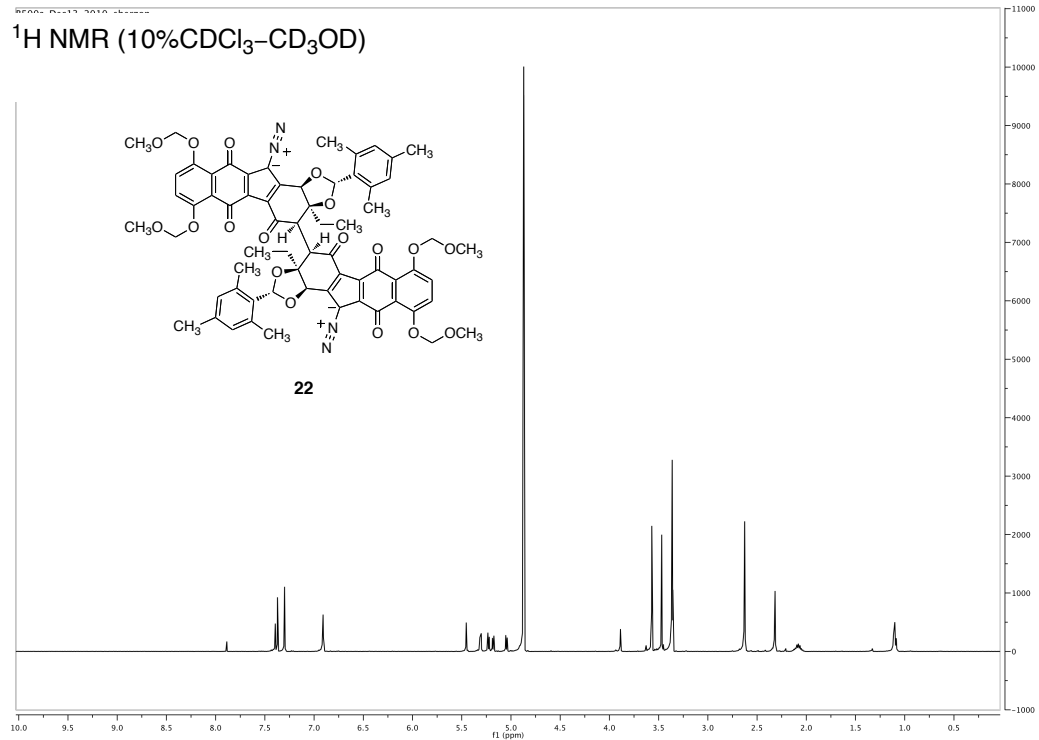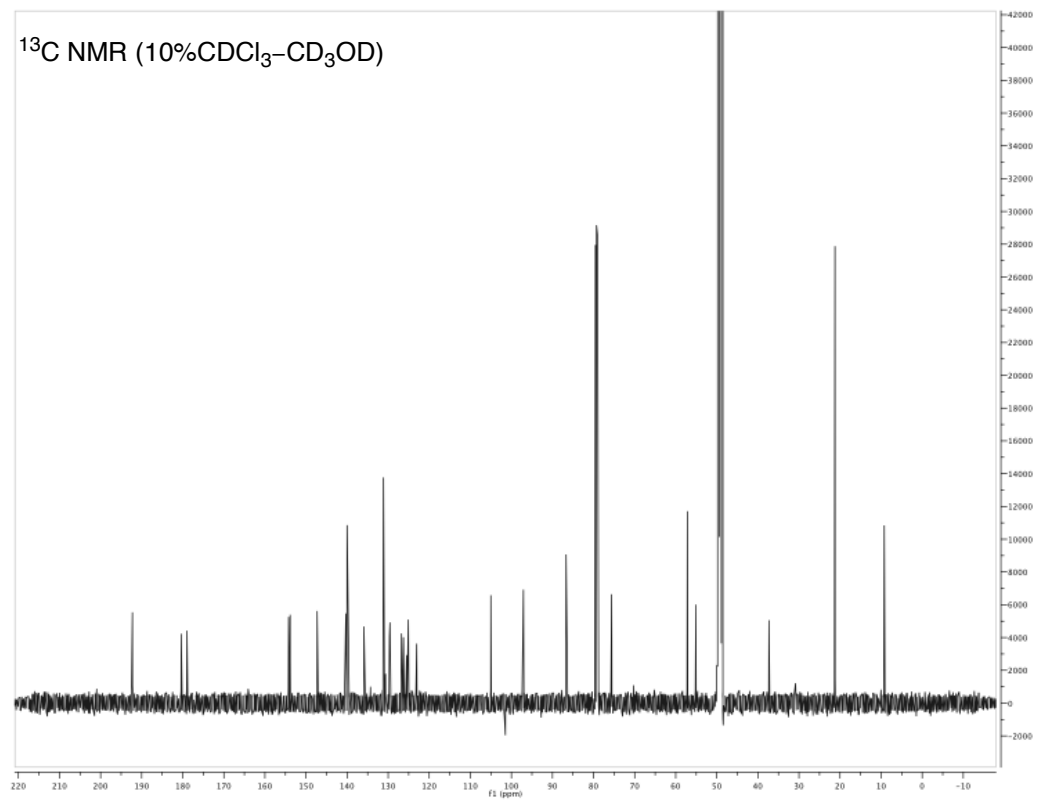

# IR

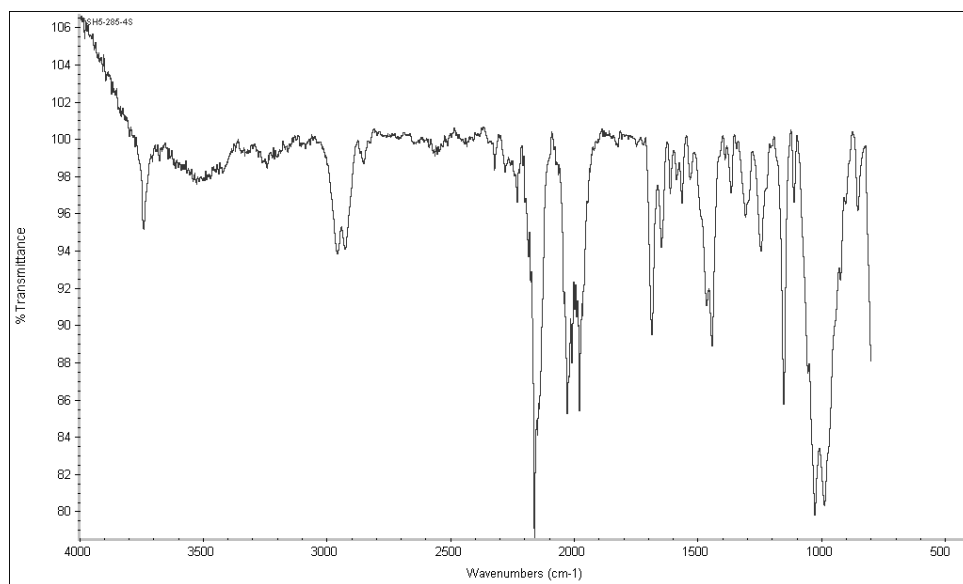

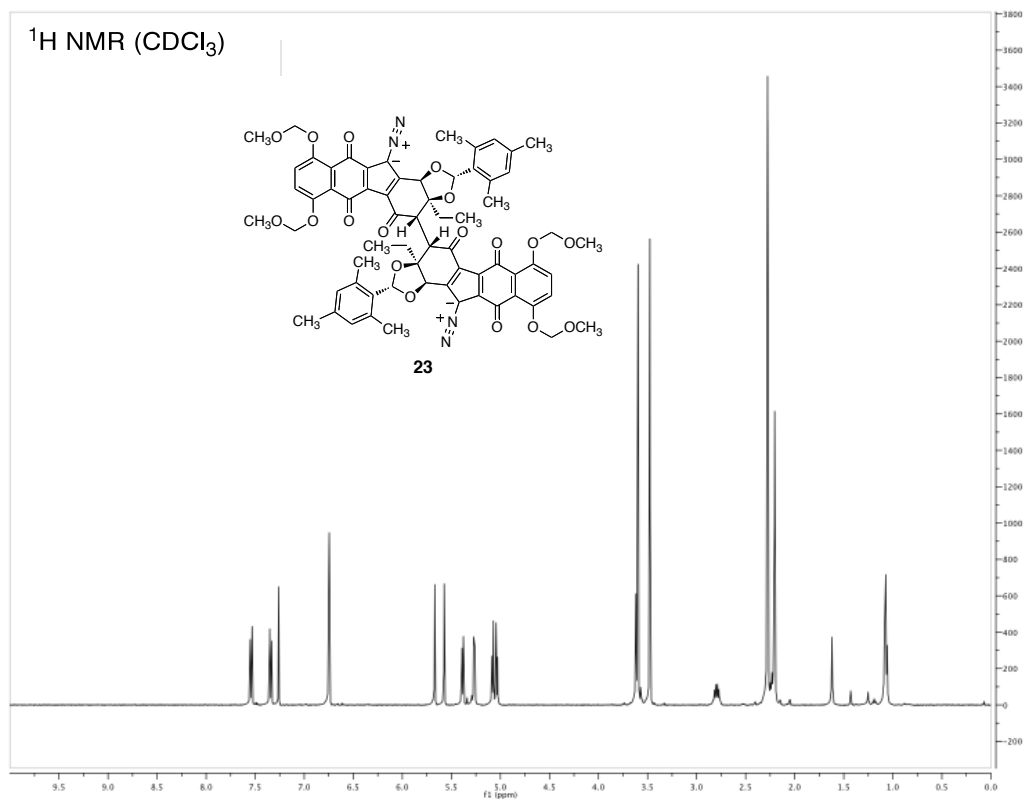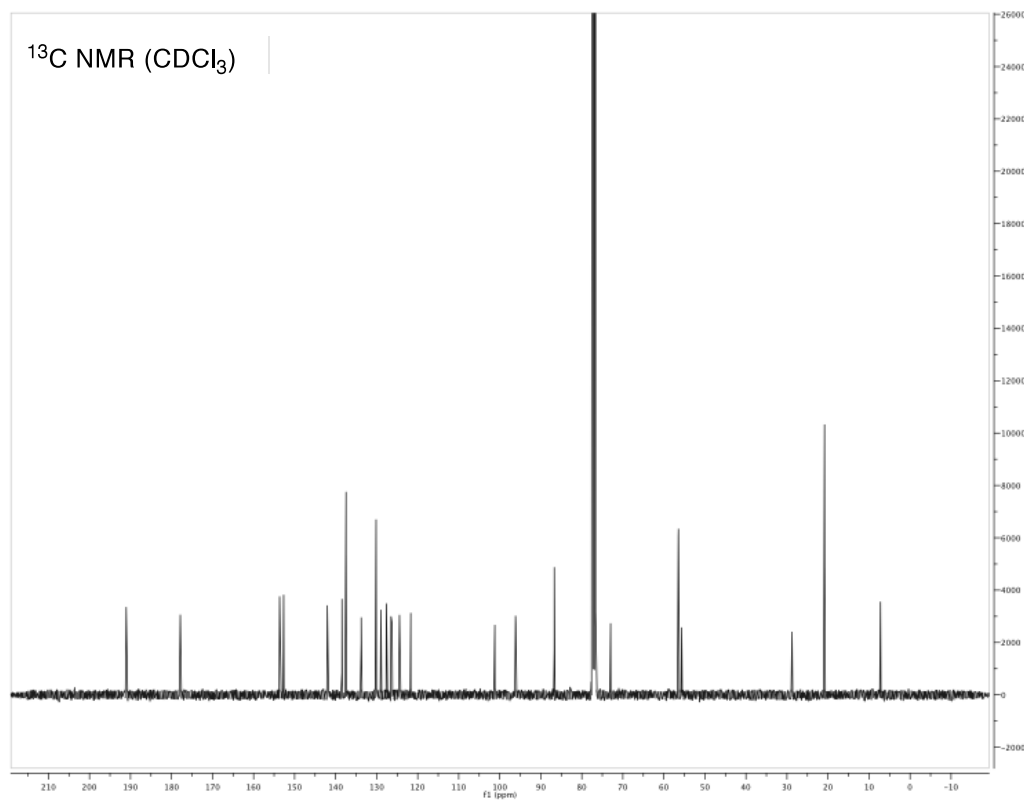

# IR

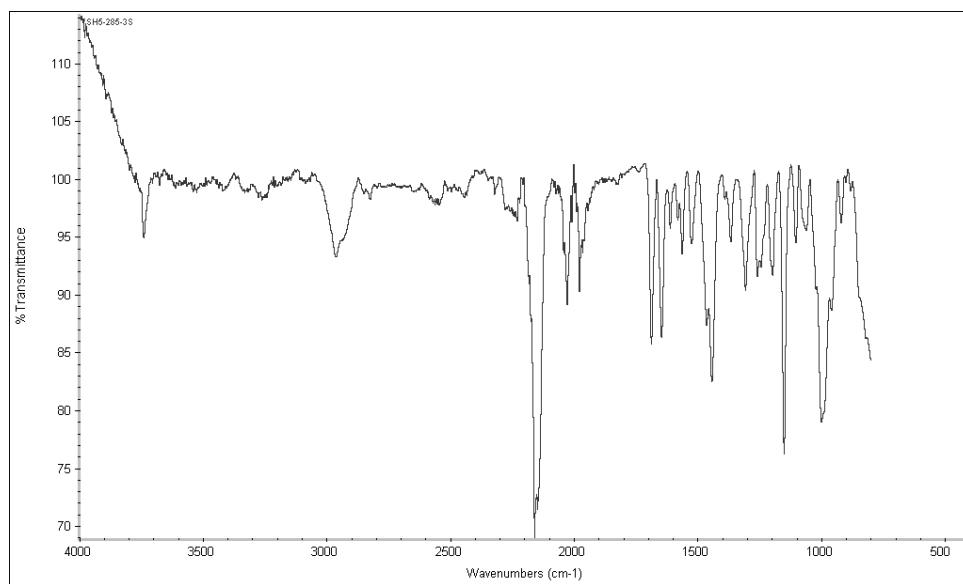



# IR

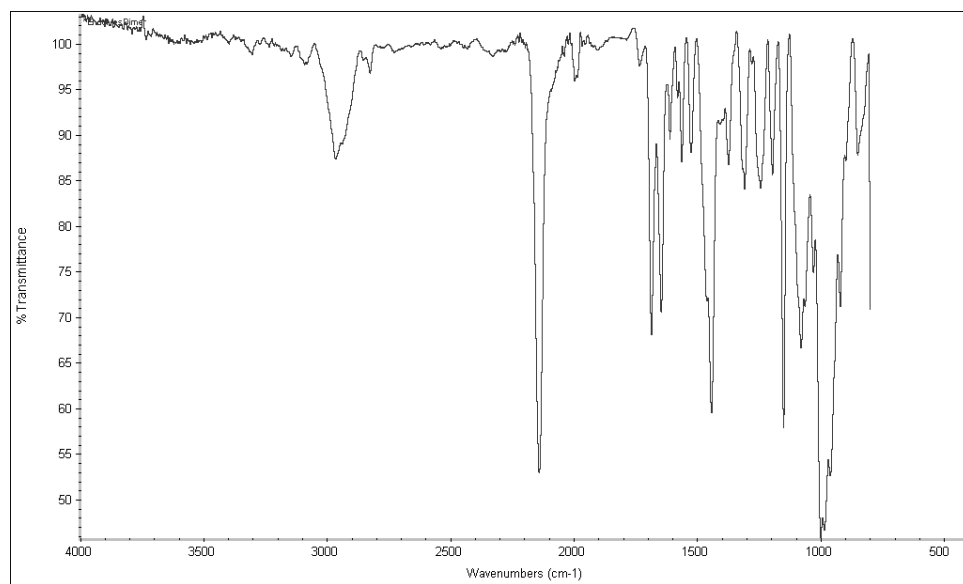



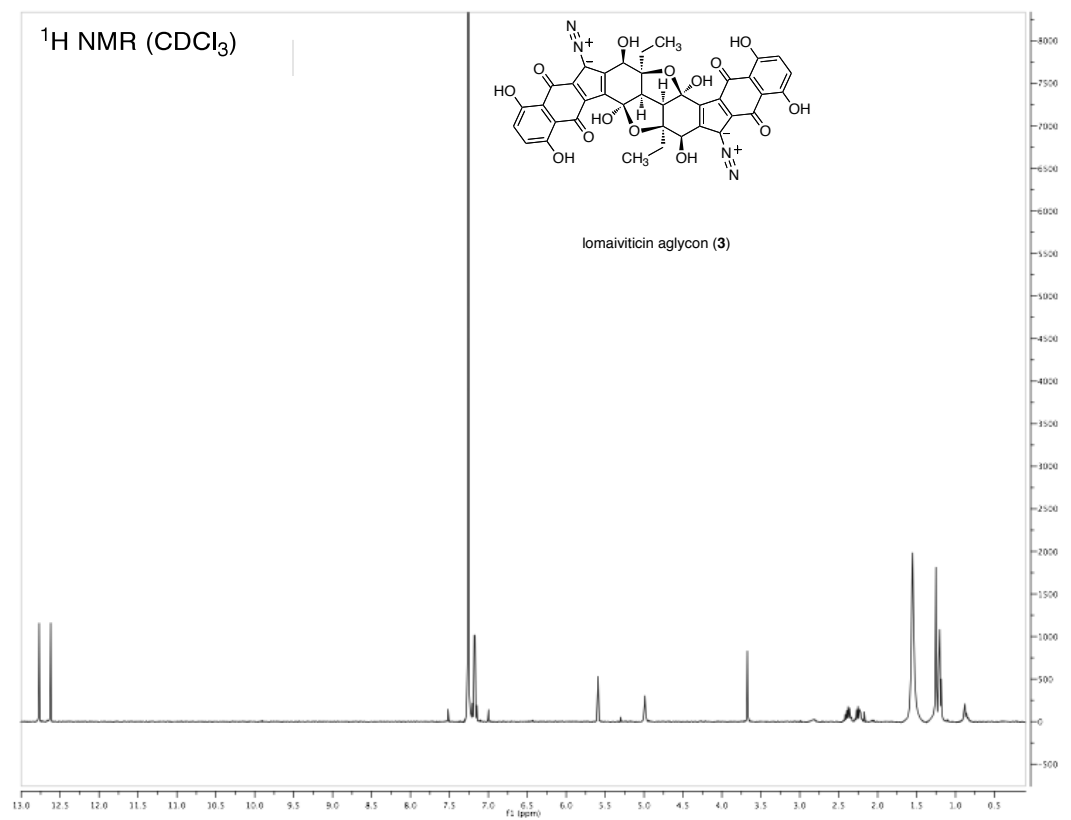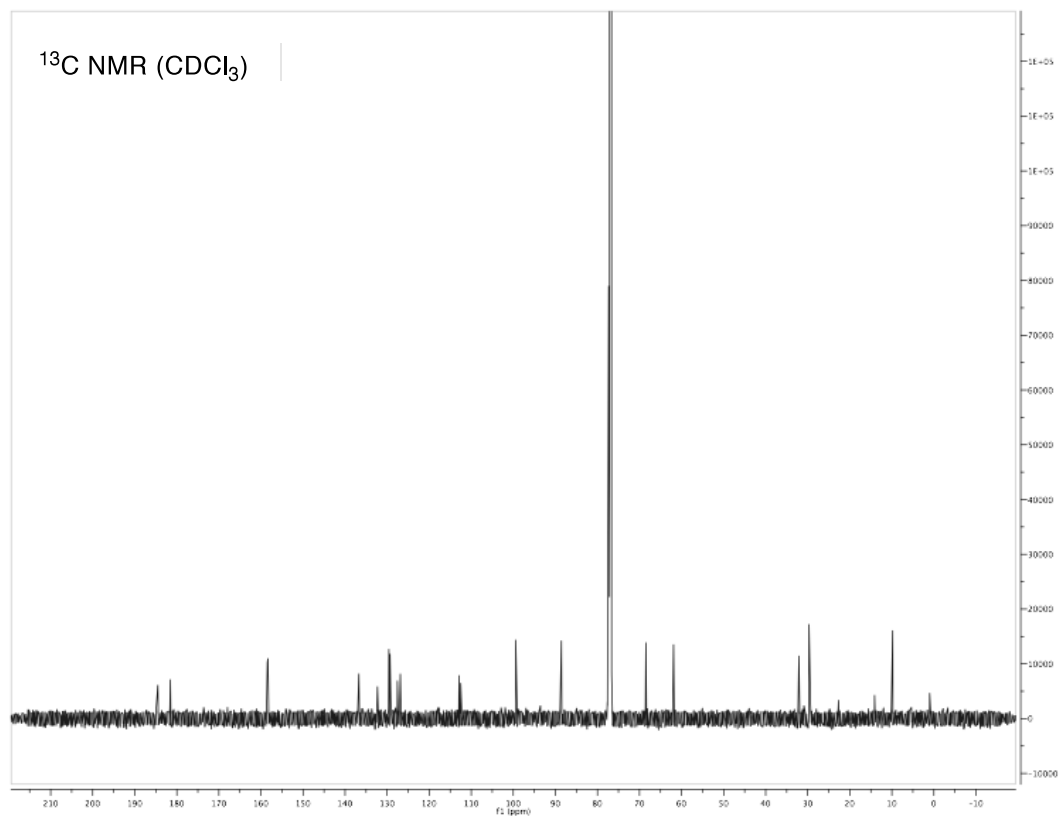

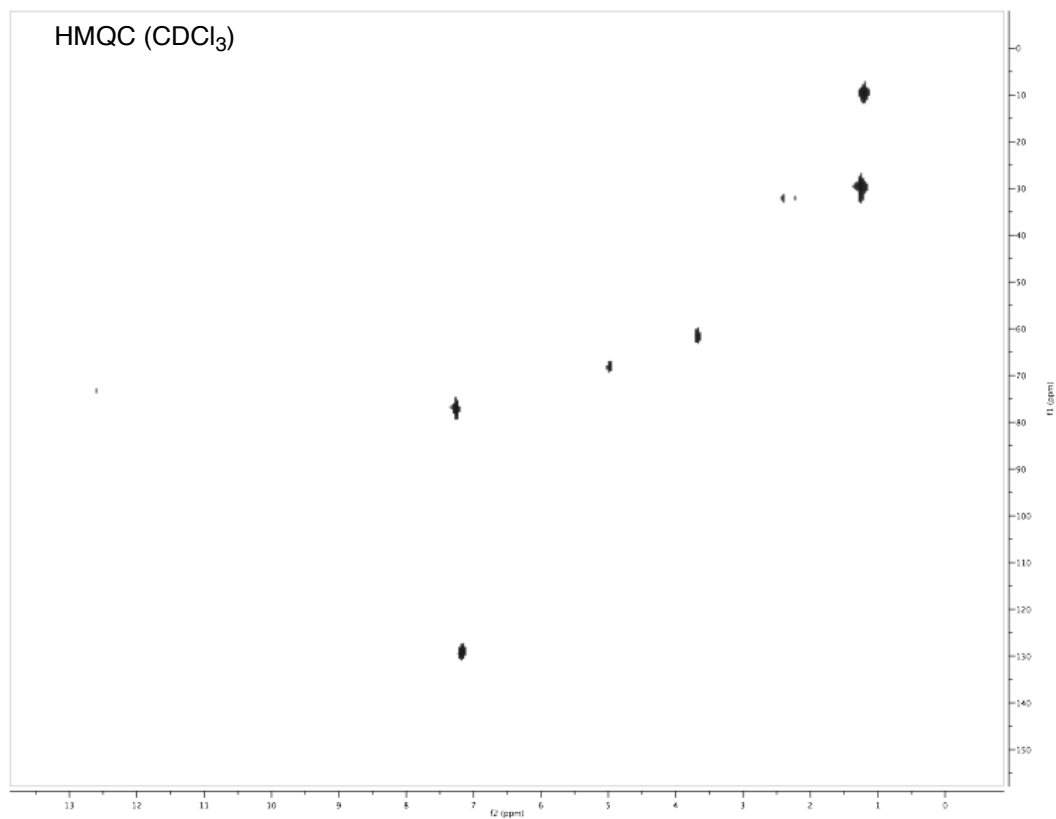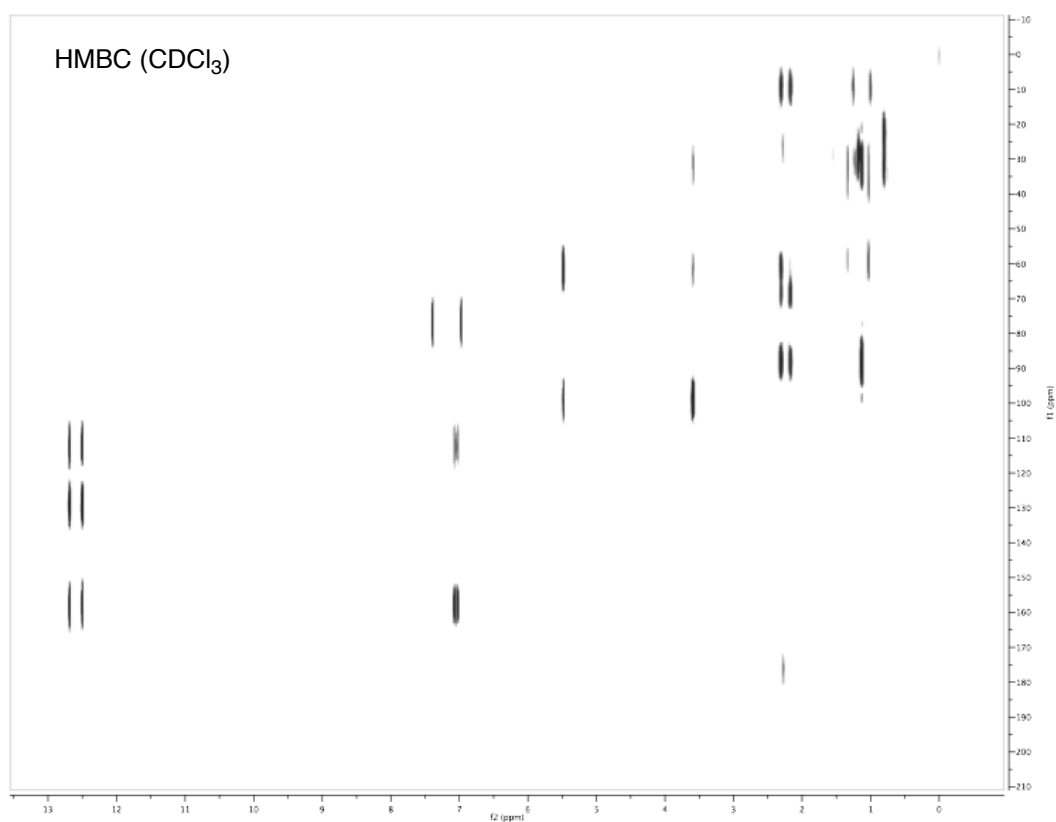

B500a\_Dec31-2010-llu  
DPFGSE\_NOE\_50Hz CDCl3 /opt/topspin llu 1

NOE (CDCl<sub>3</sub>)

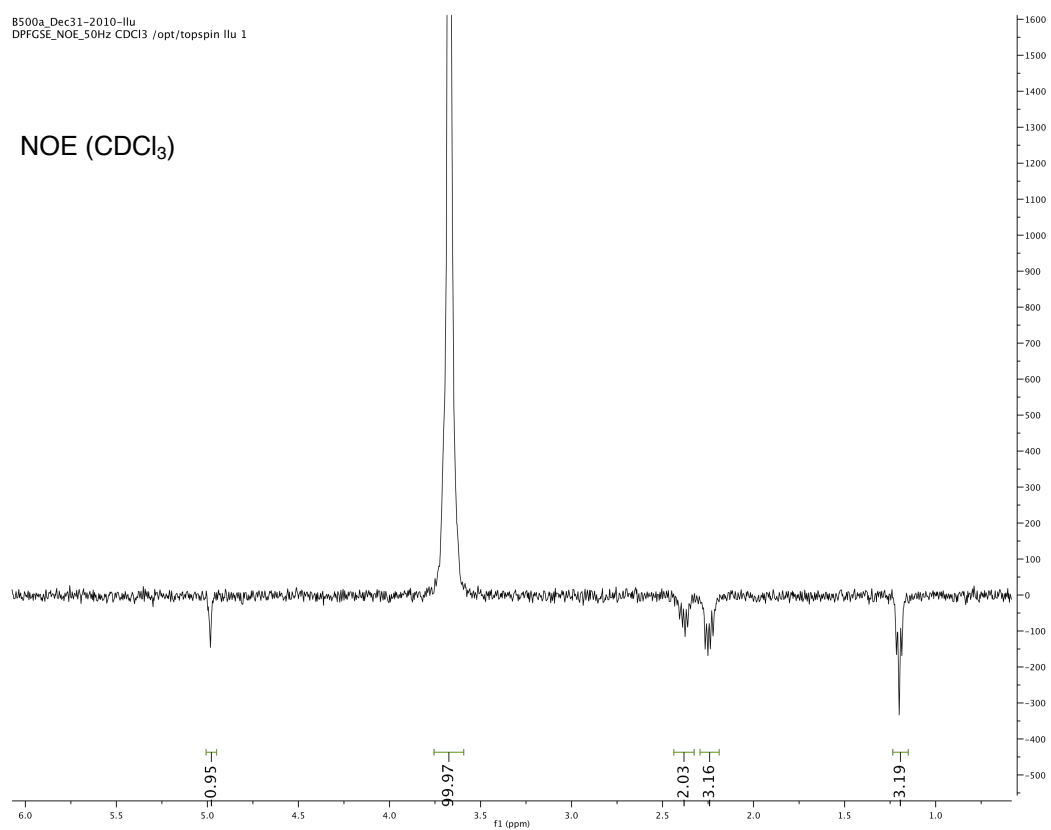

$^1\text{H}$  NMR ( $d_7$ -DMF)

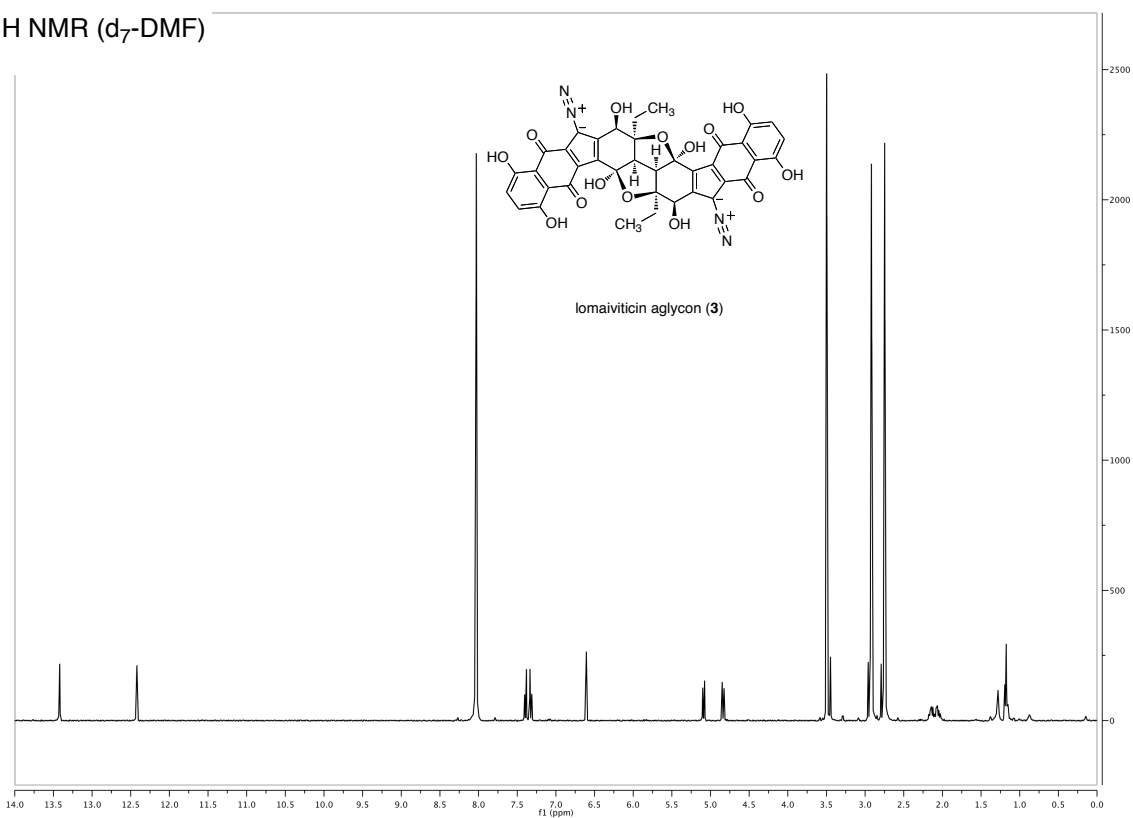

$^{13}\text{C}$  NMR ( $d_7$ -DMF)

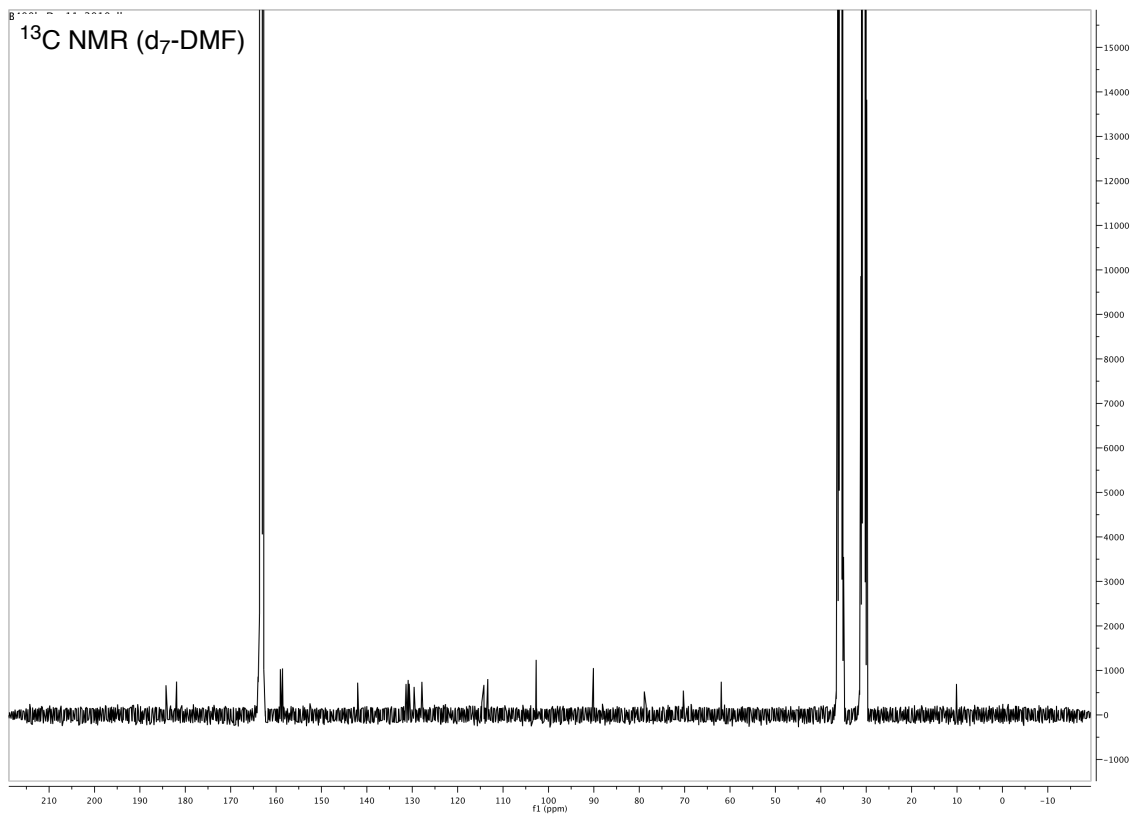

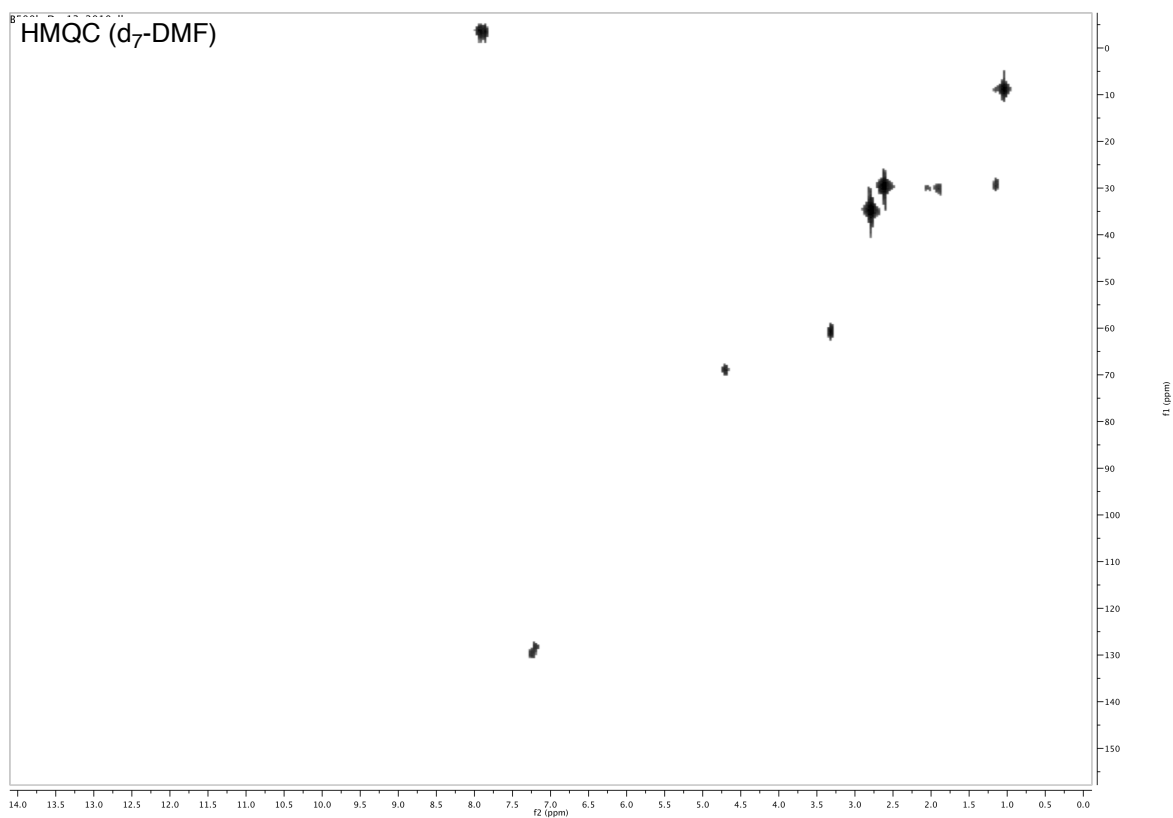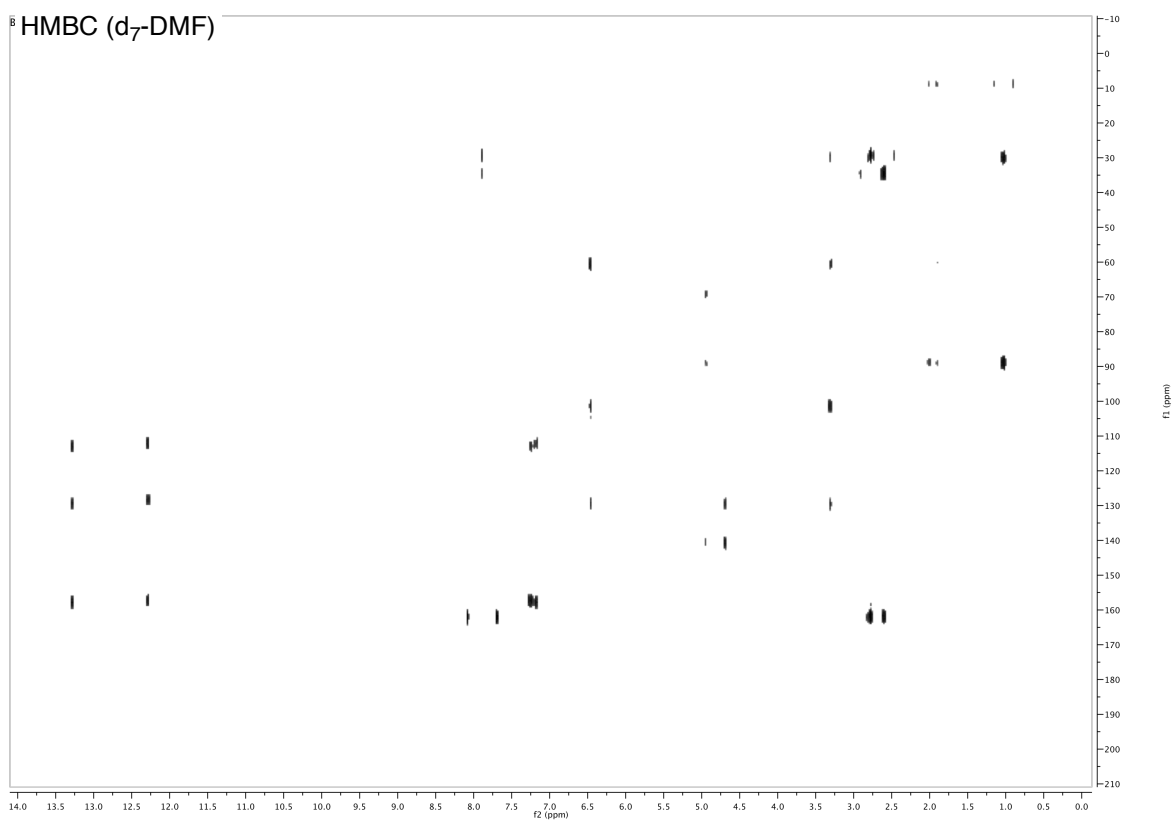

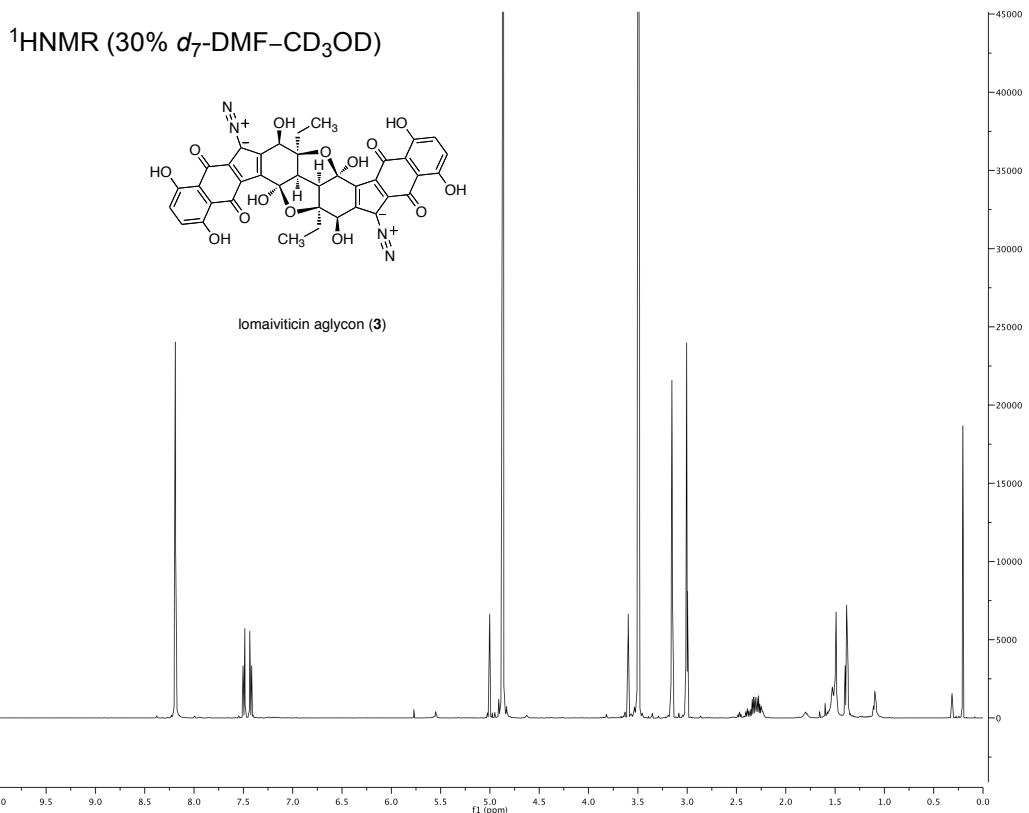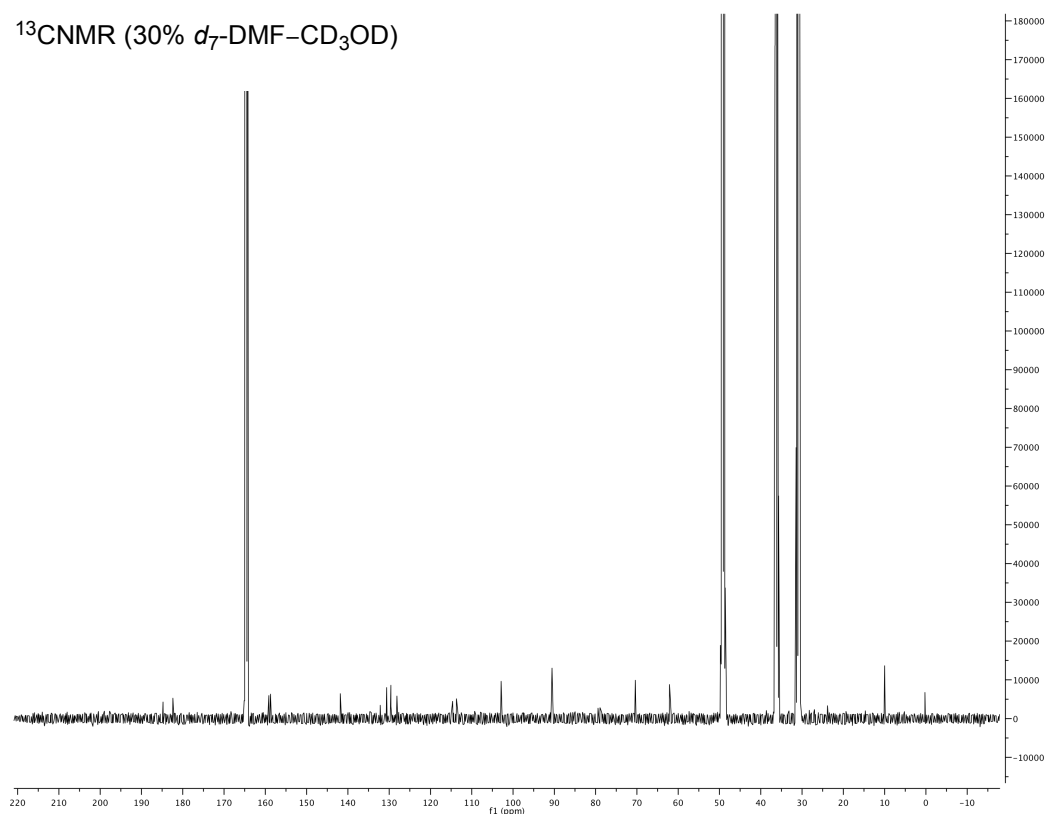

HMQC (30%  $d_7$ -DMF- $CD_3OD$ )

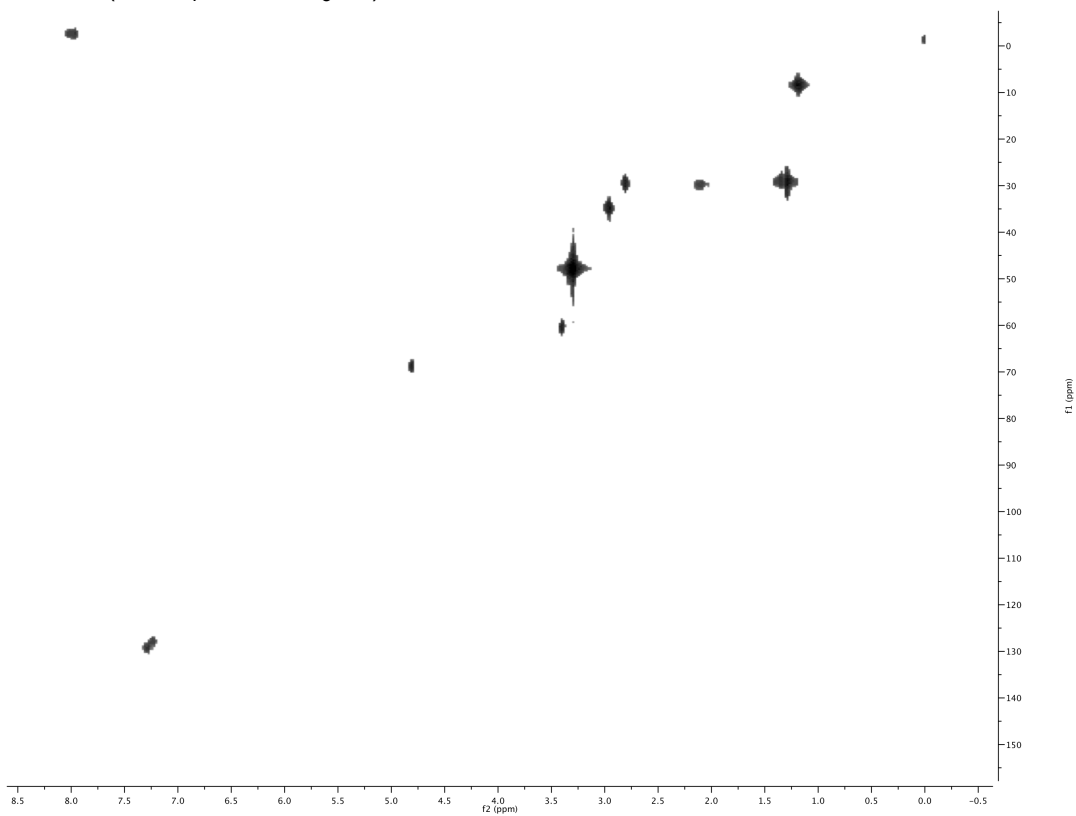

HMBC (30%  $d_7$ -DMF- $CD_3OD$ )

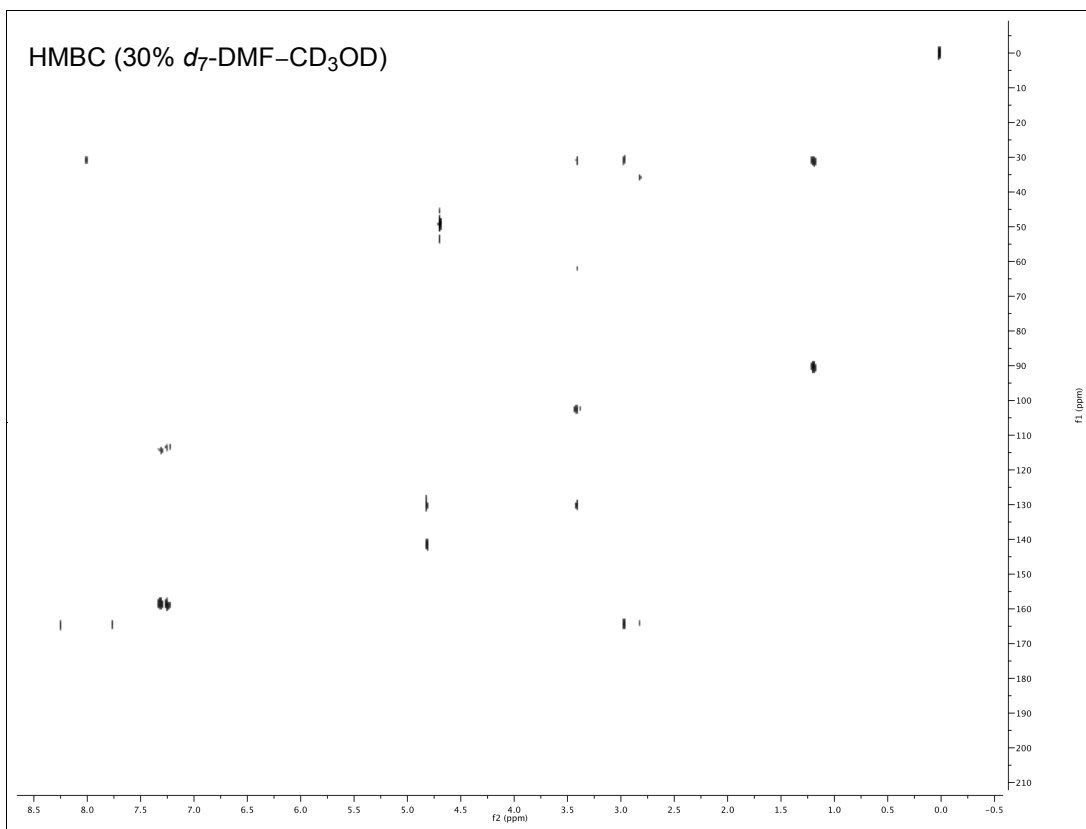

# IR

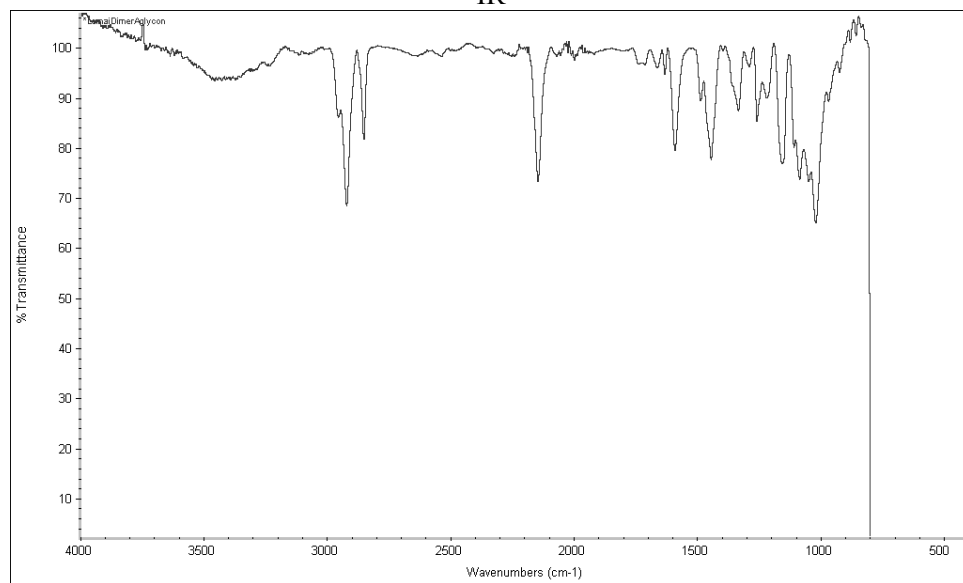



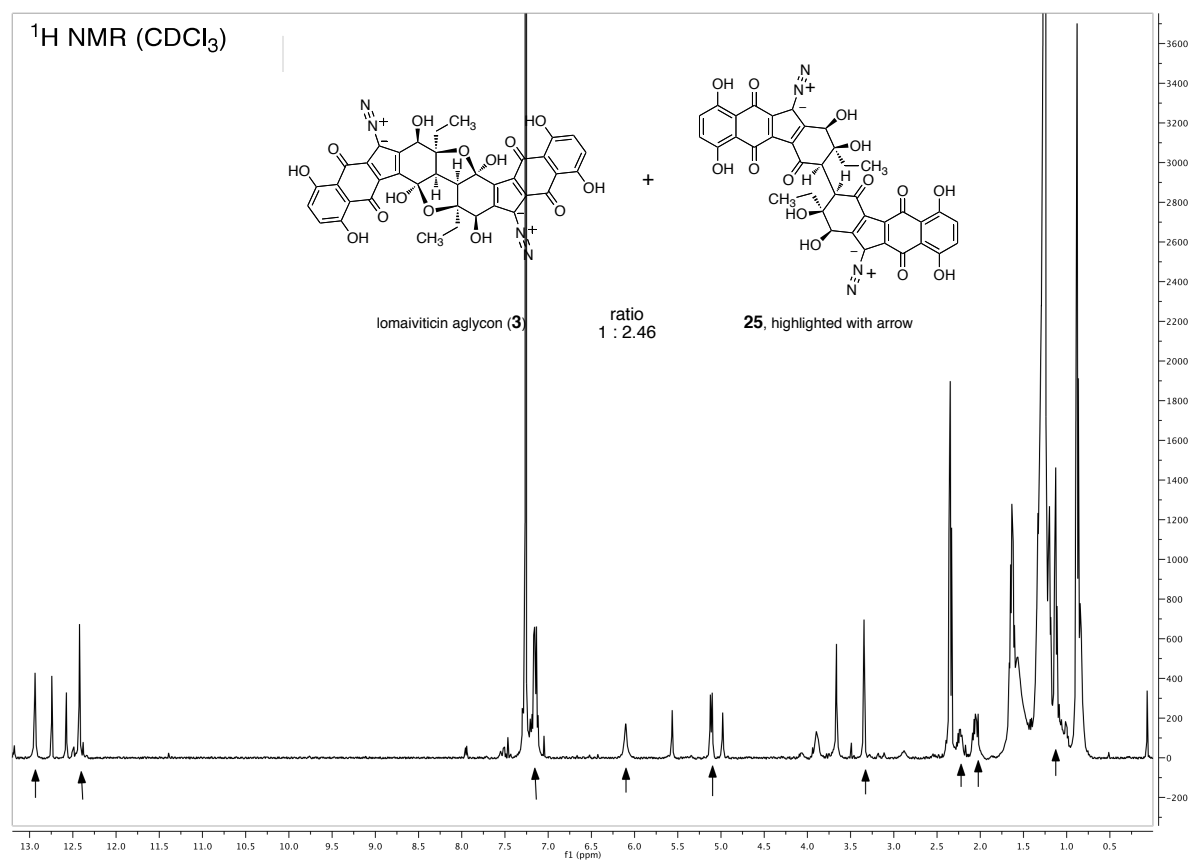

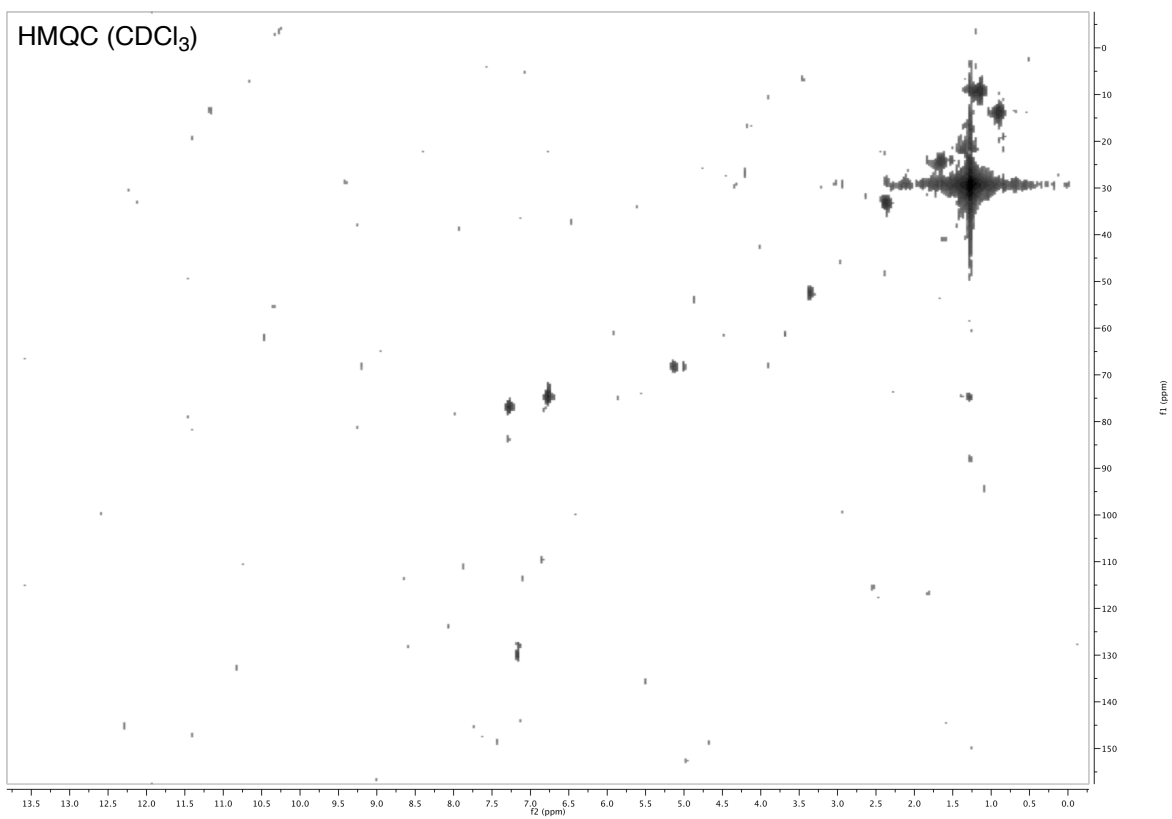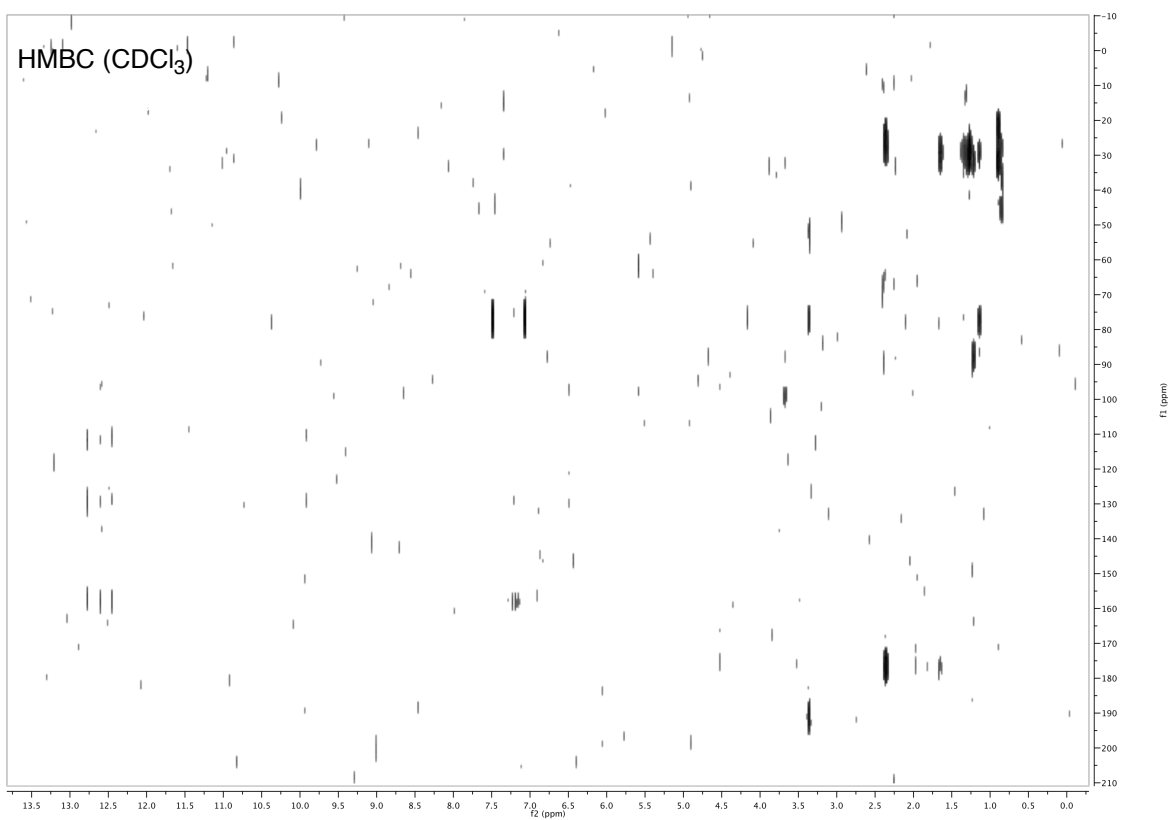

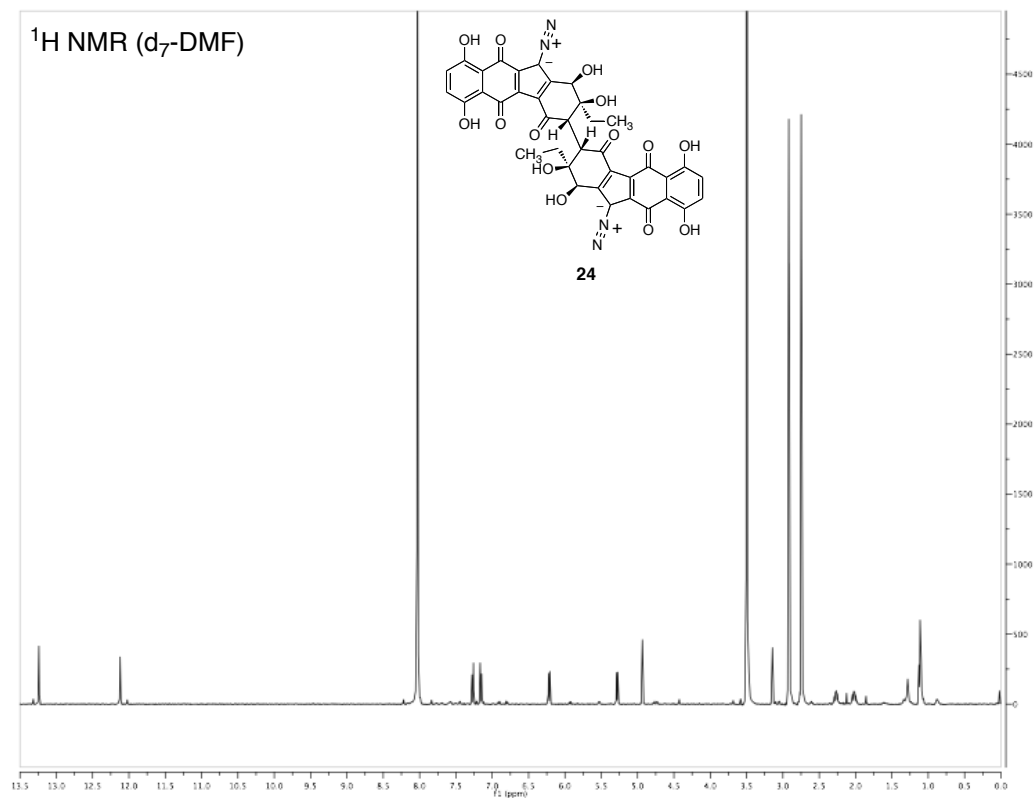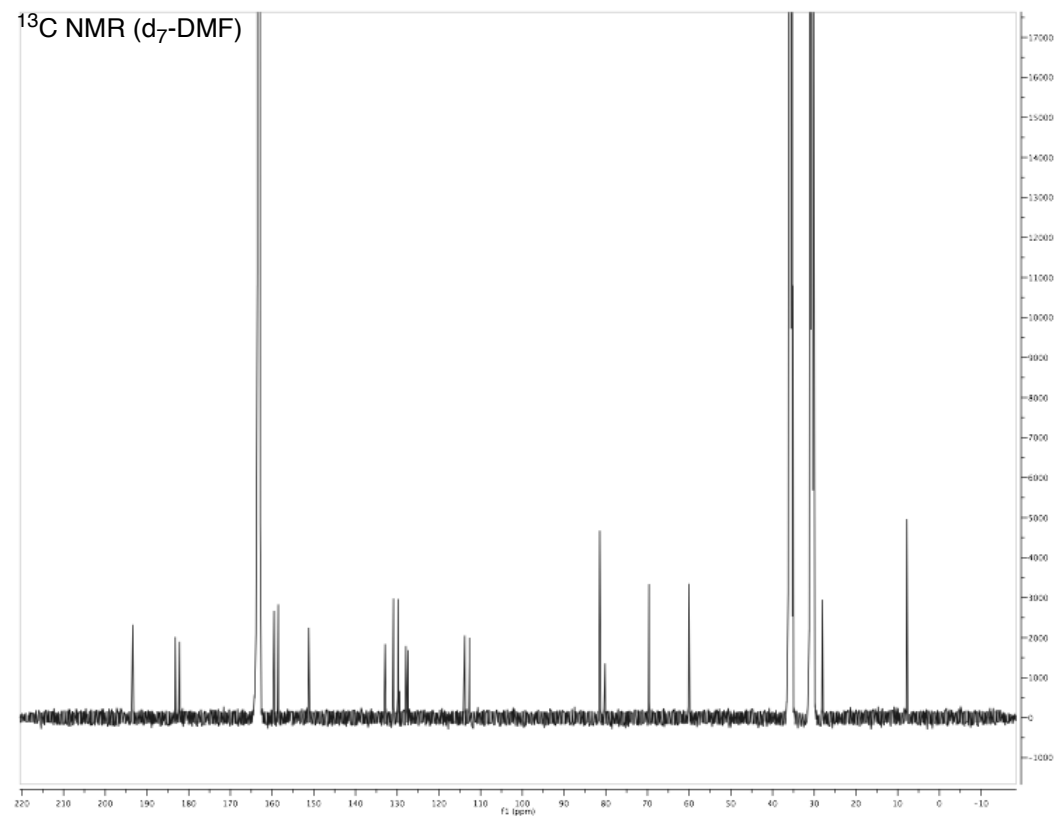

IR

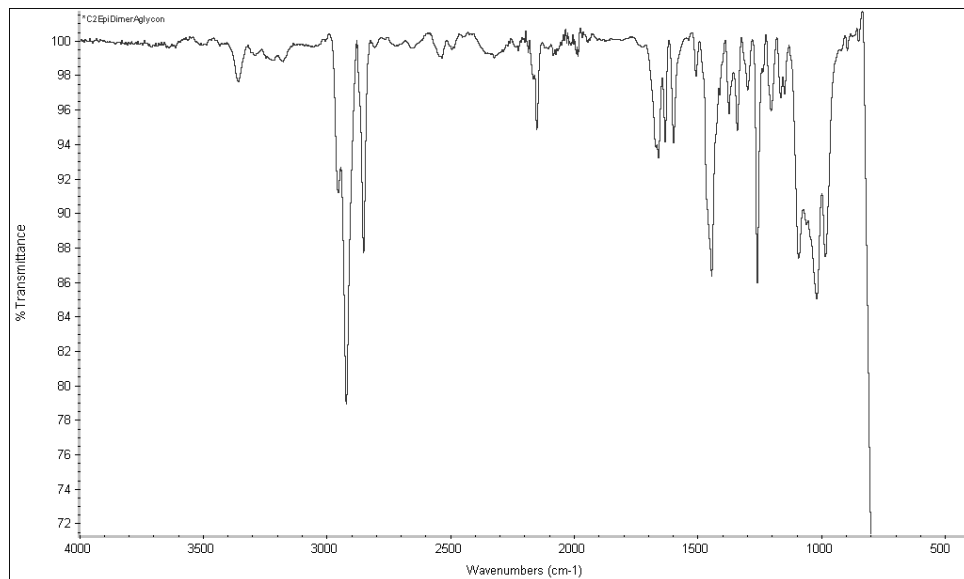

## Bibliography.

1. Still, W. C.; Kahn, M.; Mitra, A. *J. Org. Chem.* **1978**, *43*, 2923.
2. Pangborn, A. B.; Giardello, M. A.; Grubbs, R. H.; Rosen, R. K.; Timmers, F. J. *Organometallics* **1996**, *15*, 1518.
3. Fujita, M.; Hiyama, T. *erythro*-Directed Reduction of a  $\beta$ -Keto Amide: Erythro-1-(3-hydroxy-2-methyl-3-phenylpropanoyl)piperidine. In *Organic Syntheses*; Wiley & Sons: New York, 1993; Vol. 8, p 326.
4. Middleton, W. J. Tris(substituted amino)sulfonium Salts. U.S. Patent 3,940,402, 1976.
5. Bryant, J. R.; Taves, J. E.; Mayer, J. M. *Inorg. Chem.* **2002**, *41*, 2769.
6. Charette, A. B.; Wurz, R. P.; Ollevier, T. *J. Org. Chem.* **2000**, *65*, 9252.
7. Nyffeler, P. T.; Liang, C.-H.; Koeller, K. M.; Wong, C.-H. *J. Am. Chem. Soc.* **2002**, *124*, 10773.
8. Huot, R.; Brassard, P. *Can. J. Chem.* **1974**, *52*, 838.
9. Ji, N.; O'Dowd, H.; Rosen, B. M.; Myers, A. G. *J. Am. Chem. Soc.* **2006**, *128*, 14825.
10. For clarity, synthetic intermediates not described in the manuscript are numbered in the Supporting Information beginning with 27.
11. Gholap, S. L.; Woo, C. M.; Ravikumar, P. C.; Herzon, S. B. *Org. Lett.* **2009**, *11*, 4322.
12. Nicolaou, K. C.; Nold, A. L.; Li, H. *Angew. Chem., Int. Ed. Engl.* **2009**, *48*, 5860.
13. He, H.; Ding, W. D.; Bernan, V. S.; Richardson, A. D.; Ireland, C. M.; Greenstein, M.; Ellestad, G. A.; Carter, G. T. *J. Am. Chem. Soc.* **2001**, *123*, 5362.
